# Supplementary material for: Cell Wall Acetylation in Hybrid Aspen Affects Field Performance, Foliar Phenolic Composition and Resistance to Biological Stress Factors in a Construct-Dependent Fashion
Source: Front Plant Sci. 2020 May 25;11:651. doi: 10.3389/fpls.2020.00651 (PMC7265884; doi:10.3389/fpls.2020.00651)
Supplement: Supplementary file 1 [file Table_1.xlsx]

## Sheet: Tab S1 all lines means
Supplementary material: "Modification of cell wall acetylation affects field performance, phenolic composition of foliage and resistance to biotic stress factors in aspen in a construct-dependent fashion"
By: M. Derba-Maceluch, F. Amini, E.N. Donev, P. M.-A. Pawar, L. Michaud, U. Johansson, B.R. Albrectsen, E. J. Mellerowicz
Table S1. Overview of line means and s.e. after response trait
For continuous data, a one-way ANOVA with "genotype ID" as fixed effect was performed. Mean of each "genotype ID" was compared with WT-mean using Dunnets test (P) and Abs(Dif)-LSD) (fit y by x, means and sd, compare means with Dunnet's). For discrete data, counts are provided and evaluated across all lines and the Persson χ2 provided for the overall ratio; Correspondence analyses were used to com…
					Height-2014 (cm)						Height-2015 (cm)						Height-2016 (cm)						Height-2017 (cm)						Height- final 2018 (cm)
Line	Genotype ID	Promoter	Transgene	N	mean	s.e.	Abs(Dif)-LSD	p		N	mean	s.e.	Abs(Dif)-LSD	p		N	mean	s.e.	Abs(Dif)-LSD	p		N	mean	s.e.	Abs(Dif)-LSD	p		N	mean	s.e.	Abs(Dif)-LSD	p
10	17	35S	RWA-CD	25	83	3.34614	-8.96	0.9926		25	106.76	4.46291	-12.1	0.9999		25	164.36	8.71873	-28.1	1		25	278.84	18.4666	-26.7	0.9825		24	298.375	14.6866	-39.2	1
21	18	35S	RWA-CD	28	81.7857	3.57288	-9.64	0.9996		28	108.357	4.27717	-9.85	0.9911		28	158.464	6.20537	-21.1	1		28	276.571	8.81188	-22.8	0.9275		28	283.679	8.63809	-22.2	0.9052
22	19	35S	RWA-CD	27	56.6296	3.84795	7.457	0.0001		27	59.6667	3.39599	26.97	<.0001		27	63.1111	3.53345	73.9	<.0001		26	64.4231	4.69572	188.3	<.0001		26	55.9615	5.37758	204.5	<.0001
4	20	35S	AnAXE1	28	76.0357	3.25523	-11.8	1		27	99.2593	3.49015	-12.6	1		27	153.926	8.44303	-16.9	0.9829		27	240.074	10.9883	13.22	0.0021		27	244.519	11.1233	16.47	0.0009
8	21	35S	AnAXE1	28	85.6429	3.39242	-5.78	0.7256		28	105.179	4.86485	-13	1		28	156.893	8.67297	-19.5	0.9995		28	269.107	13.6245	-15.3	0.5639		28	281.107	13.7071	-19.6	0.7974
17	22	35S	AnAXE1	28	81.6071	3.22496	-9.82	0.9998		28	102.964	3.98525	-15.2	1		28	160.321	7.49974	-23	1		28	267.893	11.8907	-14.1	0.4949		28	274.143	11.5183	-12.6	0.4129
9	27	35S	HjAXE	28	85.25	3.73622	-6.18	0.7906		28	104.321	4.9559	-13.9	1		28	153.464	8.55383	-16.1	0.9715		28	257.143	14.0873	-3.34	0.0966		28	260.036	15.0494	1.476	0.0366
13	28	35S	HjAXE	28	81.7857	2.74795	-9.64	0.9996		28	105.929	3.19388	-12.3	1		28	147.643	5.37341	-10.3	0.5962		28	247.857	10.1154	5.949	0.0132		28	257.036	9.89702	4.476	0.0188
22	29	35S	HjAXE	28	81.9286	3.317	-9.5	0.9993		28	112.536	4.05142	-5.67	0.5704		28	157.357	6.3156	-20	0.9998		28	241.25	9.03105	12.56	0.0024		28	250.107	9.16809	11.4	0.0033
WT	0	none	none	56	77.8393	2.87948	-11.1	1		56	102.518	3.25975	-12.8	1		55	165.018	5.86036	-22.7	1		54	296.352	8.33967	-35.2	1		54	304.296	8.4687	-35.4	1
25	33	WP	GUS	28	84.4643	3.94019	-6.96	0.8972		28	109.286	4.55416	-8.92	0.9618		28	169.214	7.47666	-23.5	1		28	294.607	12.4557	-40.8	1		28	299.321	12.9737	-37.8	1
27	34	WP	GUS	28	77.1429	5.84923	-12.9	1		28	100.179	6.16185	-13.4	1		28	153.964	11.789	-16.6	0.9814		28	276.75	16.8227	-22.9	0.9325		28	284.929	16.9465	-23.4	0.9415
11	15	WP	RWA-ABCD	28	84.3214	3.00311	-7.1	0.9122		28	107.643	3.67107	-10.6	0.9981		28	167.429	5.83966	-25.3	1		28	294.143	9.9509	-40.3	1		28	301.964	9.13124	-40.5	1
15	16	WP	RWA-ABCD	28	80.8214	3.54788	-10.6	1		27	88.5556	2.86463	-1.92	0.1345		27	107.222	5.45098	29.78	<.0001		27	170.481	7.50316	82.81	<.0001		27	172.963	7.4674	88.03	<.0001
1	23	WP	AnAXE1	28	81.5357	4.11459	-9.89	0.9998		28	104.643	4.3626	-13.6	1		28	158.25	7.92819	-20.9	1		28	273.893	13.7943	-20.1	0.8262		28	281.357	13.2535	-19.8	0.8096
5	24	WP	AnAXE1	28	82.7857	4.19888	-8.64	0.993		27	116.667	3.9689	-1.74	0.1231		27	178.852	8.54112	-14.2	0.888		27	300.815	12.1861	-38.6	1		27	308.444	12.2858	-39.2	1
8	25	WP	AnAXE1	28	87.75	2.83899	-3.68	0.3609		28	106.036	3.95226	-12.2	1		28	161.536	6.89691	-24.2	1		28	283.929	9.73225	-30.1	0.9995		28	291.5	9.70525	-30	0.9994
10	26	WP	AnAXE1	28	85.9643	2.71069	-5.46	0.6689		28	111.786	3.60128	-6.42	0.6879		28	154.893	8.13304	-17.5	0.9926		27	275.889	9.76305	-22.6	0.9143		27	282.926	9.45991	-21.9	0.8877
11	30	WP	HjAXE	28	75.4286	4.56158	-11.2	1		25	49.52	5.17498	36.69	<.0001		18	62.7778	7.24752	69.87	<.0001		18	93.7222	8.35832	152.9	<.0001		18	85.7222	11.1495	168.6	<.0001
14B	31	WP	HjAXE	28	93.2857	3.39384	1.86	0.0136		28	115.643	3.75726	-2.57	0.1833		28	178.714	6.2212	-14	0.8864		28	299.286	10.3896	-39.6	1		28	299.286	14.4957	-37.8	1
14C	32	WP	HjAXE	28	86.25	3.8602	-5.18	0.6172		28	109.821	5.65219	-8.39	0.9278		28	169.571	8.51616	-23.1	1		28	290.357	12.6279	-36.6	1		28	296.929	12.5961	-35.4	1
					Diameter-2014 (mm)						Diameter-2015 (mm)						Diameter-2016 (mm)						Diameter-2017 (mm)						Diameter-final 2018 (mm)
Line	Genotype ID	Promoter	Transgene	N	mean	s.e.	Abs(Dif)-LSD	p		N	mean	s.e.	Abs(Dif)-LSD	p		N	mean	s.e.	Abs(Dif)-LSD	p		N	mean	s.e.	Abs(Dif)-LSD	p		N	mean	s.e.	Abs(Dif)-LSD	p
10	17	35S	RWA-CD	25	5.12	0.145144	-0.43	1		25	106.76	4.46291	-12.1	0.9999		25	18.44	1.04735	-3.67	1		25	31.96	2.1083	-4.31	1		24	33.2917	1.70409	-5.68	1
21	18	35S	RWA-CD	28	5.25	0.121987	-0.28	0.919		28	108.357	4.27717	-9.85	0.9911		28	18.0357	0.92078	-3.35	1		28	32.1429	1.41582	-4.28	1		28	32.1429	1.41582	-4.23	1
22	19	35S	RWA-CD	26	4.19231	0.124273	0.265	0.0002		27	59.6667	3.39599	26.97	<.0001		27	6.11111	0.209009	8.528	<.0001		26	7.46154	0.351834	20.27	<.0001		26	7	0.526235	20.77	<.0001
4	20	35S	AnAXE1	28	4.82143	0.178571	-0.35	0.9971		27	99.2593	3.49015	-12.6	1		27	17.4444	1.1452	-2.81	1		27	28.9259	1.53025	-1.13	0.2379		27	28.9259	1.53025	-1.08	0.2262
8	21	35S	AnAXE1	28	5.21429	0.107363	-0.32	0.9787		28	105.179	4.86485	-13	1		28	17.1786	1.26099	-2.5	0.9988		28	30.5357	1.78507	-2.67	0.8511		28	30.5357	1.78507	-2.63	0.8373
17	22	35S	AnAXE1	28	5.07143	0.162068	-0.46	1		28	102.964	3.98525	-15.2	1		28	17.3929	0.940476	-2.71	0.9999		28	29.6786	1.52497	-1.81	0.4911		28	29.8214	1.53535	-1.91	0.5353
9	27	35S	HjAXE	28	5.25	0.189855	-0.28	0.919		28	104.321	4.9559	-13.9	1		28	17.9286	1.28784	-3.25	1		28	29.3929	1.77902	-1.53	0.375		28	29.3929	1.77902	-1.48	0.3593
13	28	35S	HjAXE	28	4.89286	0.0939898	-0.42	1		28	105.929	3.19388	-12.3	1		28	15.6786	0.898343	-1	0.3666		28	26.1071	1.28106	1.757	0.0018		28	26.1071	1.28106	1.801	0.0016
22	29	35S	HjAXE	28	5.10714	0.165386	-0.42	1		28	112.536	4.05142	-5.67	0.5704		28	16.8571	0.893413	-2.17	0.9794		28	27.25	1.2865	0.614	0.0175		28	27.25	1.2865	0.659	0.0161
WT	0	none	none	56	5	0.111075	-0.43	1		56	102.518	3.25975	-12.8	1		55	18.3273	0.771572	-2.99	1		54	33.3704	1.0432	-4.55	1		54	33.4074	1.04025	-4.54	1
25	33	WP	GUS	28	5.28571	0.124479	-0.24	0.8032		28	109.286	4.55416	-8.92	0.9618		28	18.2143	0.897317	-3.53	1		28	32.8214	1.44846	-4.96	1		28	32.6429	1.39084	-4.73	1
27	34	WP	GUS	28	5.07143	0.170034	-0.46	1		28	100.179	6.16185	-13.4	1		28	16.4286	1.17111	-1.75	0.8406		28	30	1.83946	-2.14	0.6335		28	30	1.83946	-2.09	0.6151
11	15	WP	RWA-ABCD	28	5.14286	0.17604	-0.39	0.9999		28	107.643	3.67107	-10.6	0.9981		28	18.9643	0.820508	-3.01	1		28	34.0714	1.29092	-4.81	1		28	34.0714	1.29092	-4.83	1
15	16	WP	RWA-ABCD	28	5.28571	0.161484	-0.24	0.8032		27	88.5556	2.86463	-1.92	0.1345		27	13.2963	0.703704	1.343	0.001		27	21.7037	1.21577	6.094	<.0001		27	21.7407	1.21199	6.101	<.0001
1	23	WP	AnAXE1	28	5.07143	0.125236	-0.46	1		28	104.643	4.3626	-13.6	1		28	17.1786	0.997422	-2.5	0.9988		28	30.6786	1.70438	-2.81	0.8947		28	30.6786	1.70438	-2.77	0.8833
5	24	WP	AnAXE1	28	5	0.16265	-0.53	1		27	116.667	3.9689	-1.74	0.1231		27	19.9259	1.18144	-2.09	0.9599		27	35.3333	1.95024	-3.61	0.9951		27	35.3333	1.95024	-3.64	0.996
8	25	WP	AnAXE1	28	5.5	0.096225	-0.03	0.0804		28	106.036	3.95226	-12.2	1		28	18.6071	0.975004	-3.36	1		28	32.6429	1.36782	-4.78	1		28	32.6429	1.36782	-4.73	1
10	26	WP	AnAXE1	28	5.21429	0.139511	-0.32	0.9787		28	111.786	3.60128	-6.42	0.6879		28	17.2143	1.07196	-2.53	0.9992		27	31.7037	1.37314	-3.91	0.9994		27	31.7037	1.37314	-3.86	0.9991
11	30	WP	HjAXE	28	5.07143	0.114186	-0.46	1		25	49.52	5.17498	36.69	<.0001		18	6.94444	0.481502	7.121	<.0001		18	9.72222	0.819714	17.21	<.0001		18	9.5	0.940206	17.48	<.0001
14B	31	WP	HjAXE	28	5.46429	0.140691	-0.07	0.1366		28	115.643	3.75726	-2.57	0.1833		28	19.6429	1.06807	-2.33	0.9936		28	34.1786	1.57111	-4.7	1		28	33.5714	1.89989	-5.33	1
14C	32	WP	HjAXE	28	5.39286	0.129501	-0.14	0.336		28	109.821	5.65219	-8.39	0.9278		28	19.0357	1.06468	-2.94	1		28	33.3571	1.57545	-5.49	1		28	33.3571	1.57545	-5.45	1
					Volume-2014 (cm3)						Volume-2015 (cm3)						Volume- 2016 (cm3)						Volume-2017 (cm3)						Volume-final 2018 (cm3)
Line	Genotype ID	Promoter	Transgene	N	mean	s.e.	Abs(Dif)-LSD	p		N	mean	s.e.	Abs(Dif)-LSD	p		N	mean	s.e.	Abs(Dif)-LSD	p		N	mean	s.e.	Abs(Dif)-LSD	p		N	mean	s.e.	Abs(Dif)-LSD	p
10	17	35S	RWA-CD	28	5.36389	0.569622	-1.76	1		28	22.7906	3.05597	-9.85	1		28	156.403	23.5798	-63	1		28	835.957	115.607	-250	0.9995		28	854.977	117.032	-248	0.9989
21	18	35S	RWA-CD	28	6.15861	0.449059	-1.09	0.9807		28	25.7825	2.71452	-9.35	1		28	155.639	19.0415	-62.5	1		28	829.28	87.368	-243	0.9989		28	848.208	88.1024	-241	0.9977
22	19	35S	RWA-CD	28	2.6319	0.304841	0.972	<0.0001		28	4.15237	0.414696	8.81	<.0001		28	6.46382	0.723836	86.7	<.0001		28	10.5378	1.85181	575.5	<.0001		28	9.27356	1.6421	598	<.0001
4	20	35S	AnAXE1	28	5.05213	0.377242	-1.45	1		28	20.8697	2.78342	-7.9	0.9997		28	151.104	25.7742	-58	0.9992		28	597.467	81.9174	-11.25	0.0659		28	607.208	82.9784	-0.085	0.0501
8	21	35S	AnAXE1	28	6.33028	0.445347	-0.92	0.8862		28	24.8945	3.29542	-10.2	1		28	163.734	31.8612	-70.5	1		28	807.828	126.778	-221.5	0.9906		28	841.235	130.451	-234	0.9954
17	22	35S	AnAXE1	28	5.8632	0.507073	-1.39	1		28	23.0577	2.70722	-10.1	1		28	151.045	19.0958	-58	0.9992		28	726.16	86.0569	-140	0.6525		28	746.831	87.5066	-139.5	0.6333
9	27	35S	HjAXE	28	6.75558	0.666951	-0.5	0.3644		28	24.5899	3.05928	-10.55	1		28	172.816	29.4493	-79.5	1		28	731.291	103.393	-145	0.6878		28	743.08	104.357	-136	0.6076
13	28	35S	HjAXE	28	5.25109	0.321207	-1.65	1		28	24.5231	2.94542	-10.6	1		28	112.352	15.7074	-19.2	0.2845		28	512.309	66.1178	73.9	0.0063		28	528.657	67.1042	78.45	0.0058
22	29	35S	HjAXE	28	6.03693	0.477763	-1.22	0.9975		28	28.5207	2.89819	-6.6	0.9786		28	138.144	20.2709	-44.95	0.9341		28	532.736	64.2195	53.45	0.0117		28	551.483	66.1197	55.65	0.0113
WT	0	none	none	56	5.42842	0.385829	-1.49	1		56	24.0396	2.03252	-9.05	1		56	176.36	18.7334	-68	1		56	940.033	77.9913	-289	1		56	967.418	80.1323	-294	1
25	33	WP	GUS	28	6.31747	0.491025	-0.94	0.8971		28	26.523	2.58156	-8.6	1		28	169.42	18.6384	-76.5	1		28	932.727	85.7813	-346.5	1		28	934.465	81.9711	-327.5	1
27	34	WP	GUS	28	5.8904	0.607657	-1.36	0.9999		28	21.0491	2.51229	-8.1	0.9999		28	151.646	23.5572	-58.5	0.9994		28	827.809	105.643	-241.5	0.9986		28	849.661	107.329	-242.5	0.998
11	15	WP	RWA-ABCD	28	6.25103	0.605823	-1	0.9433		28	24.6722	2.94343	-10.45	1		28	173.505	18.5731	-80.5	1		28	977.906	101.033	-316	1		28	999.46	100.926	-328.5	1
15	16	WP	RWA-ABCD	28	6.3285	0.510304	-0.92	0.8877		28	16.5493	1.80631	-3.585	0.4777		28	57.4571	8.3398	35.71	0.0005		28	242.143	32.7884	344.05	<.0001		28	245.823	32.8656	361.3	<.0001
1	23	WP	AnAXE1	28	5.67555	0.459899	-1.58	1		28	22.0891	2.84481	-9.15	1		28	149.803	20.5325	-56.5	0.9985		28	818.958	104.884	-233	0.9965		28	835.198	105.435	-228	0.9922
5	24	WP	AnAXE1	28	5.84442	0.493837	-1.41	1		28	34.9938	5.40364	-0.125	0.0551		28	219.844	37.2403	-39.7	0.8364		28	1115.56	168.105	-178.5	0.8835		28	1144.95	174.803	-183	0.8888
8	25	WP	AnAXE1	28	7.05818	0.375917	-0.19	0.1204		28	27.9111	3.56569	-7.2	0.9955		28	172.945	25.2084	-80	1		28	882.536	103.446	-296.5	1		28	904.355	105.602	-297	1
10	26	WP	AnAXE1	28	6.43971	0.470018	-0.81	0.7705		28	28.5583	3.61519	-6.55	0.9768		28	147.71	17.686	-54.5	0.9963		28	781.581	90.1103	-195.5	0.9464		28	798.846	90.8821	-191.5	0.9239
11	30	WP	HjAXE	28	5.32398	0.478593	-1.72	1		28	4.02013	0.703012	8.94	<.0001		28	6.83361	2.10042	86.35	<.0001		28	20.5744	5.65306	565.5	<.0001		28	20.3369	5.88497	587	<.0001
14B	31	WP	HjAXE	28	7.64982	0.560013	0.397	<0.0058		28	31.5632	4.22759	-3.555	0.4707		28	211.128	31.4434	-48.4	0.9709		28	1032.85	122.765	-261	0.9999		28	1049.74	126.208	-278	1
14C	32	WP	HjAXE	28	6.91333	0.546801	-0.34	0.2133		28	28.8666	3.20342	-6.25	0.9575		28	191.926	21.1536	-67.5	1		28	963.239	93.0749	-330.5	1		28	983.298	94.4756	-344.5	1
					weight of 1 leaf (g)						Apical Dominance 2017						Branching 2017						Chlorophyll 2017						Condensed tannins (mg/g DW)
Line	Genotype ID	Promoter	Transgene	N	mean	s.e.	Abs(Dif)-LSD	p		N	mean	s.e.	Abs(Dif)-LSD	p		N	mean	s.e.	Abs(Dif)-LSD	p		N	mean	s.e.	Abs(Dif)-LSD	p		N	mean	s.e.	Abs(Dif)-LSD	p
10	17	35S	RWA-CD	14	0.0912298	0.0036078	-0.01	0.9976		14	7.07143	0.578595	-1.31	0.9992		14	30.2857	0.714286	-2.64	0.9594		14	12.131	0.190632	-0.34	0.4524		14	106.574	8.14213	-17.4	1
21	18	35S	RWA-CD	14	0.0826751	0.0021615	-0.02	1		14	6.71429	0.558929	-1.67	1		14	28.8571	1.13804	-4.07	1		14	12.1349	0.303873	-0.34	0.444		14	101.649	5.42961	-12.5	0.9311
22	19	35S	RWA-CD	13	0.0446292	0.0058063	0.022	<.0001		13	4	0	0.569	0.0025		13	23.5385	1.92692	-0.01	0.0511		13	11.4568	0.573746	-1.04	1		11	57.7451	6.59467	29.39	<.0001
4	20	35S	AnAXE1	13	0.0779286	0.0033831	-0.01	0.9773		14	6.78571	0.566254	-1.6	1		14	28.1429	1.25294	-4.5	1		14	9.98651	0.285288	0.326	0.0023		14	130.304	9.66804	-5.07	0.2617
8	21	35S	AnAXE1	14	0.0861201	0.0032135	-0.02	1		14	7.14286	0.533052	-1.24	0.9963		14	29.1429	1.09874	-3.78	1		14	11.6214	0.240621	-0.85	1		14	130.166	5.80521	-5.21	0.2716
17	22	35S	AnAXE1	14	0.0811412	0.003831	-0.01	1		14	7.64286	0.357143	-0.74	0.641		14	28.2857	1.1972	-4.64	1		14	11.2095	0.297627	-0.9	1		14	141.199	5.55028	5.826	0.0041
9	27	35S	HjAXE	16	0.0770209	0.0036045	-0.01	0.896		15	5.6	0.688684	-0.94	0.8908		15	28.3333	1.18187	-4.49	1		15	10.7493	0.319276	-0.41	0.6375		15	104.138	5.13144	-14.5	0.9933
13	28	35S	HjAXE	15	0.0742321	0.0027196	-0.01	0.5732		14	6.64286	0.550795	-1.74	1		14	29.5714	0.970523	-3.36	0.9998		14	9.26627	0.285038	1.046	<.0001		14	94.477	3.61968	-5.35	0.2822
22	29	35S	HjAXE	14	0.0705911	0.003072	-0.003	0.1991		14	6.35714	0.598599	-1.74	1		14	30.2857	0.714286	-2.64	0.9594		14	9.05159	0.245861	1.261	<.0001		14	103.706	3.36138	-14.6	0.9907
WT	0	none	none	27	0.0853405	0.0020323	-0.01	1		28	6.5	0.41627	-1.54	1		28	28.2857	0.861979	-3.79	1		28	11.3913	0.182233	-0.88	1		27	112.25	3.02139	-19.1	1
25	33	WP	GUS	14	0.0817076	0.0034417	-0.01	1		15	7.26667	0.419372	-1.07	0.97		15	27.8	1.49666	-4.05	1		15	10.8926	0.210571	-0.56	0.9146		14	105.073	6.33073	-15.9	0.9988
27	34	WP	GUS	14	0.0810692	0.0030616	-0.01	1		14	7.64286	0.225006	-0.74	0.641		14	29.8571	0.906976	-3.07	0.9966		14	10.8571	0.200627	-0.55	0.8817		14	104.486	5.20958	-15.4	0.9969
11	15	WP	RWA-ABCD	14	0.0804846	0.0026393	-0.01	0.9998		14	7.14286	0.49009	-1.24	0.9963		14	28.2857	1.1972	-4.64	1		14	11.2575	0.216938	-0.95	1		14	123.599	3.87127	-11.8	0.8865
15	16	WP	RWA-ABCD	14	0.0545586	0.0022771	0.013	<.0001		14	3.64286	0.439869	0.974	0.0002		14	30.2857	0.714286	-2.64	0.9594		14	10.6921	0.193341	-0.38	0.5411		13	159.629	6.47758	23.68	<.0001
1	23	WP	AnAXE1	14	0.0832799	0.0031985	-0.02	1		14	6.35714	0.607708	-1.74	1		14	28.1429	1.25294	-4.5	1		13	11.4132	0.308298	-1.08	1		14	113.273	4.29205	-22.1	1
5	24	WP	AnAXE1	13	0.087156	0.0033334	-0.02	1		14	6.35714	0.651348	-1.74	1		14	30.2857	0.714286	-2.64	0.9594		14	11.5298	0.198755	-0.94	1		14	116.441	7.26094	-18.9	1
8	25	WP	AnAXE1	13	0.0839724	0.002884	-0.02	1		13	5.38462	0.780684	-0.82	0.7116		13	29	1.06217	-4.05	1		13	11.3085	0.27056	-1.02	1		13	127.242	7.47799	-8.71	0.5761
10	26	WP	AnAXE1	14	0.0766886	0.0020894	-0.01	0.8988		14	7.71429	0.163363	-0.67	0.5479		14	29.5714	0.970523	-3.36	0.9998		14	11.3774	0.313528	-1.07	1		14	117.349	7.5987	-18	1
11	30	WP	HjAXE	13	0.0559346	0.0187425	0.011	<.0001		14	3.85714	0.0970523	0.76	0.0007		14	15.7143	2.84475	7.93	<.0001		13	6.42949	0.618171	3.855	<.0001		13	93.0835	10.4341	-4.53	0.2184
14B	31	WP	HjAXE	14	0.0851671	0.0036817	-0.02	1		14	7	0.480384	-1.38	0.9999		14	28.2857	1.28571	-4.64	1		14	11.431	0.158879	-1.04	1		14	102.282	4.195	-13.2	0.9585
14C	32	WP	HjAXE	14	0.0834012	0.002293	-0.02	1		14	6.78571	0.493681	-1.6	1		14	29.5714	0.970523	-3.36	0.9998		14	11.4563	0.226535	-1.01	1		14	110.122	8.57145	-21	1
					Hare (0/1)			Model χ2=55.048 ***			Multiple hare (0/1)			Model χ2=49.243***			Injury (0/1)			Model χ2=107.363 ***			Multiple injury (0/1)			. Model χ2=176.408***			Survival Rate (0/1)			Model χ2=113,98 ***
Line	Genotype ID	Promoter	Transgene	N	N(no)	N(yes)	F(All): 0,62	c1	p<0,05	N	N(no)	N(yes)	F(All): 0,898	c1	p<0,05	N	N(no)	N(yes)	F(All): 0,659	c1	p<0,05	N	N(no)	N(yes)	F(All): 0,865	c1	p<0,05	N	N(no)	N(yes)	F(All): 0,04	c1	p<0,05
10	17	35S	RWA-CD	28	20	8	0.714286	-0.194		28	27	1	0.964286	-0.2197		28	18	10	0.892857	0.034		28	26	2	0.928571	-0.185		28	4	24	0.142857	0.501
21	18	35S	RWA-CD	28	20	8	0.714286	-0.194		28	27	1	0.964286	-0.2197		28	19	9	0.785714	-0.041		28	28	0	1	-0.395		28	0	28	0	-0.21
22	19	35S	RWA-CD	28	12	16	0.428571	0.3947		28	17	11	0.607143	0.959	*	28	4	24	0.821429	1.089	*	28	12	16	0.428571	1.279	*	28	4	24	0.142857	0.501
4	20	35S	AnAXE1	28	19	9	0.678571	-0.1204		28	27	1	0.964286	-0.2197		28	25	3	0.785714	-0.493		28	28	0	1	-0.395		28	1	27	0.0357143	-0.032
8	21	35S	AnAXE1	28	17	11	0.607143	0.0268		28	26	2	0.928571	-0.1018		28	22	6	0.821429	-0.267		28	26	2	0.928571	-0.185		28	0	28	0	-0.21
17	22	35S	AnAXE1	28	24	4	0.857143	-0.4883		28	28	0	1	-0.3375		28	23	5	0.714286	-0.342		28	27	1	0.964286	-0.29		28	0	28	0	-0.21
9	27	35S	HjAXE	28	18	10	0.642857	-0.0468		28	26	2	0.928571	-0.1018		28	22	6	0.428571	-0.267		28	25	3	0.892857	-0.081		28	0	28	0	-0.21
13	28	35S	HjAXE	28	20	8	0.714286	-0.194		28	26	2	0.928571	-0.1018		28	23	5	0.642857	-0.342		28	26	2	0.928571	-0.185		28	0	28	0	-0.21
22	29	35S	HjAXE	28	17	11	0.607143	0.0268		28	26	2	0.928571	-0.1018		28	20	8	0.785714	-0.116		28	27	1	0.964286	-0.29		28	0	28	0	-0.21
WT	0	none	none	56	34	22	0.607143	0.0268		56	50	6	0.892857	0.0161		56	36	20	0.642857	0.034		56	50	6	0.892857	-0.081		56	2	54	0.0357143	-0.032
25	33	WP	GUS	28	18	10	0.642857	-0.0468		28	26	2	0.928571	-0.1018		28	20	8	0.714286	-0.116		28	24	4	0.857143	0.024		28	0	28	0	-0.21
27	34	WP	GUS	28	16	12	0.571429	0.1003		28	23	5	0.821429	0.2518		28	19	9	0.678571	-0.041		28	24	4	0.857143	0.024		28	0	28	0	-0.21
11	15	WP	RWA-ABCD	28	20	8	0.714286	-0.194		28	26	2	0.928571	-0.1018		28	19	9	0.678571	-0.041		28	27	1	0.964286	-0.29		28	0	28	0	-0.21
15	16	WP	RWA-ABCD	28	8	20	0.285714	0.689	*	28	23	5	0.821429	0.2518		28	12	16	0.142857	0.486		28	21	7	0.75	0.338		28	1	27	0.0357143	-0.032
1	23	WP	AnAXE1	28	16	12	0.571429	0.1003		28	24	4	0.857143	0.1339		28	18	10	0.642857	0.034		28	26	2	0.928571	-0.185		28	0	28	0	-0.21
5	24	WP	AnAXE1	28	17	11	0.607143	0.0268		28	27	1	0.964286	-0.2197		28	22	6	0.740741	-0.267		28	26	2	0.928571	-0.185		28	1	27	0.0357143	-0.032
8	25	WP	AnAXE1	28	16	12	0.571429	0.1003		28	27	1	0.964286	-0.2197		28	23	5	0.678571	-0.342		28	27	1	0.964286	-0.29		28	0	28	0	-0.21
10	26	WP	AnAXE1	28	19	9	0.678571	-0.1204		28	26	2	0.928571	-0.1018		28	20	8	0.678571	-0.116		28	26	2	0.928571	-0.185		28	1	27	0.0357143	-0.032
11	30	WP	HjAXE	28	8	20	0.285714	0.689	*	28	21	7	0.75	0.4875		28	2	26	0.821429	1.24	*	28	6	22	0.214286	1.907	*	28	11	17	0.392857	1.744	*
14B	31	WP	HjAXE	28	26	2	0.928571	-0.6355	*	28	26	2	0.928571	-0.1018		28	20	8	0.714286	-0.116		28	26	2	0.928571	-0.185		28	1	27	0.0357143	-0.032
14C	32	WP	HjAXE	28	17	11	0.607143	0.0268		28	24	4	0.857143	0.1339		28	19	9	0.0714286	-0.041		28	25	3	0.892857	-0.081		28	0	28	0	-0.21
					Chewing 2017 (damage%)						Chlorosis (0/1)			Model χ2=65.509 ***			Necrosis (0/1)			Model χ2=223.241***			HR (0/1)			Model χ2=31.201*
Line	Genotype ID	Promoter	Transgene	N	mean	s.e.	Abs(Dif)-LSD	p		N	N(no)	N(yes)	F(All): 0.948	c1	p<0,05	N	N(no)	N(yes)	F(All): 0.926	c1	p<0,05	N	N(no)	N(yes)	F(All): 0.824	c1	p<0,05
10	17	35S	RWA-CD	23	6	0.992063	-5.38	1		22	22	0	1	-0.235		22	22	0	1	-0.283		22	19	3	0.863636	-0.1047
21	18	35S	RWA-CD	28	6.60714	1.06575	-4.78	1		28	26	2	0.928571	0.086		28	28	0	1	-0.283		28	20	8	0.714286	0.2873
22	19	35S	RWA-CD	14	23.6429	5.01383	11.08	<.0001		12	12	0	1	-0.235		12	11	1	0.916667	0.036		13	12	1	0.923077	-0.2607
4	20	35S	AnAXE1	27	20.7037	2.30496	9.27	<.0001		27	26	1	0.962963	-0.069		27	24	3	0.888889	0.142		27	23	4	0.851852	-0.0738
8	21	35S	AnAXE1	27	11.3333	1.38469	-0.1	0.0583		26	23	3	0.884615	0.283		26	25	1	0.961538	-0.136		27	26	1	0.962963	-0.3654
17	22	35S	AnAXE1	28	11.7143	1.62313	0.329	0.0293		28	26	2	0.928571	0.086		28	28	0	1	-0.283		28	22	6	0.785714	0.0998
9	27	35S	HjAXE	27	7.7037	1.10143	-3.73	0.9984		26	23	3	0.884615	0.283		26	23	3	0.884615	0.158		26	24	2	0.923077	-0.2607
13	28	35S	HjAXE	28	6.14286	0.866353	-5.24	1		28	24	4	0.857143	0.406		28	12	16	0.428571	1.9	*	28	26	2	0.928571	-0.2751
22	29	35S	HjAXE	27	8.14815	1.2807	-3.29	0.9759		27	26	1	0.962963	-0.069		27	12	15	0.444444	1.839	*	27	24	3	0.888889	-0.171
WT	0	none	none	54	5.07407	0.439054	-3.5	0.9999		54	54	0	1	-0.235		54	53	1	0.981481	-0.212		54	47	7	0.87037	-0.1224
25	33	WP	GUS	27	5.88889	0.804782	-5.04	1		27	26	1	0.962963	-0.069		27	27	0	1	-0.283		27	22	5	0.814815	0.0234
27	34	WP	GUS	26	4.92308	0.826341	-4.12	1		26	26	0	1	-0.235		26	26	0	1	-0.283		26	25	1	0.961538	-0.3616
11	15	WP	RWA-ABCD	28	6.03571	0.720967	-5.14	1		28	26	2	0.928571	0.086		28	28	0	1	-0.283		28	20	8	0.714286	0.2873
15	16	WP	RWA-ABCD	26	8.65385	1.64358	-2.83	0.873		24	24	0	1	-0.235		24	24	0	1	-0.283		24	16	8	0.666667	0.4122
1	23	WP	AnAXE1	26	6.65385	0.679236	-4.83	1		25	25	0	1	-0.235		25	25	0	1	-0.283		25	22	3	0.88	-0.1476
5	24	WP	AnAXE1	26	4.57692	0.480938	-3.78	0.9985		26	26	0	1	-0.235		26	26	0	1	-0.283		26	21	5	0.807692	0.0421
8	25	WP	AnAXE1	28	5.03571	0.901912	-4.14	1		28	25	3	0.892857	0.246		28	28	0	1	-0.283		28	21	7	0.75	0.1935
10	26	WP	AnAXE1	27	6.33333	0.727952	-5.1	1		27	27	0	1	-0.235		27	27	0	1	-0.283		27	19	8	0.703704	0.315
11	30	WP	HjAXE	11	2.63636	0.491246	-3.47	0.8128		10	5	5	0.5	2.01	*	10	10	0	1	-0.283		10	9	1	0.9	-0.2001
14B	31	WP	HjAXE	27	5.2963	0.551648	-4.44	1		27	27	0	1	-0.235		27	26	1	0.962963	-0.141		27	19	8	0.703704	0.315
14C	32	WP	HjAXE	28	8.25	2.15388	-3.14	0.9596		28	26	2	0.928571	0.086		28	28	0	1	-0.283		28	21	7	0.75	0.1935
					Gall organisms (0/1)			Model χ2=21.19 n.s.			Aphids (0/1)			Model χ2=36.288*			Rust (0/1)			Model χ2=50.542***			Venturia (0/1)			Model χ2= n.s.		N	Miners (0/1)		Model χ2=20.289 n.s.
Line	Genotype ID	Promoter	Transgene	N	N(no)	N(yes)	F(All): 0.872	c1	p<0,05	N	N(no)	N(yes)	F(All): 0.673	c1	p<0,05	N	N(no)	N(yes)	F(All): 0.191	c1	p<0,05	N	N(no)	N(yes)	F(All): 0.959	c1	p<0,05		N(no)	N(yes)	F(All): 0,92	c1	p<0,05
10	17	35S	RWA-CD	22	19	3	0.863636	0.026		22	14	8	0.636364	0.0787		23	2	21	0.0869565	-0.2641		22	21	1	0.954545	0.0201		23	19	4	1	0.3543
21	18	35S	RWA-CD	28	26	2	0.928571	-0.1686		28	20	8	0.714286	-0.0874		28	3	25	0.107143	-0.2128		28	27	1	0.964286	-0.0287		28	24	4	0.925926	0.2389
22	19	35S	RWA-CD	13	12	1	0.923077	-0.1521		12	11	1	0.916667	-0.5189		14	7	7	0.5	0.7872		12	11	1	0.916667	0.2102		13	12	1	1	-0.0061
4	20	35S	AnAXE1	27	24	3	0.888889	-0.0497		27	22	5	0.814815	-0.3018		27	9	18	0.333333	0.363		27	26	1	0.962963	-0.0221		27	27	0	1	-0.292
8	21	35S	AnAXE1	26	23	3	0.884615	-0.0369		26	14	12	0.538462	0.2875		27	3	24	0.111111	-0.2027		27	26	1	0.962963	-0.0221		27	25	2	0.892857	-0.0167
17	22	35S	AnAXE1	28	22	6	0.785714	0.2594		28	16	12	0.571429	0.2172		28	4	24	0.142857	-0.1219		28	27	1	0.964286	-0.0287		28	28	0	0.928571	-0.292
9	27	35S	HjAXE	26	25	1	0.961538	-0.2674		26	16	10	0.615385	0.1235		27	8	19	0.296296	0.2687		26	24	2	0.923077	0.178		26	26	0	0.916667	-0.292
13	28	35S	HjAXE	28	26	2	0.928571	-0.1686		28	18	10	0.642857	0.0649		28	14	14	0.5	0.7872	*	28	27	1	0.964286	-0.0287		28	25	3	0.961538	0.1062
22	29	35S	HjAXE	28	21	7	0.75	0.3664		27	25	2	0.925926	-0.5387		27	7	20	0.259259	0.1744		27	27	0	1	-0.2079		28	27	1	0.884615	-0.1593
WT	0	none	none	54	49	5	0.907407	-0.1052		54	35	19	0.648148	0.0536		54	7	47	0.12963	-0.1555		54	51	3	0.944444	0.0708		54	47	7	0.826087	0.1898
25	33	WP	GUS	27	23	4	0.851852	0.0613		27	16	11	0.592593	0.172		28	3	25	0.107143	-0.2128		27	27	0	1	-0.2079		27	27	0	0.925926	-0.292
27	34	WP	GUS	26	22	4	0.846154	0.0783		26	18	8	0.692308	-0.0406		27	5	22	0.185185	-0.0141		26	25	1	0.961538	-0.015		27	23	4	0.928571	0.2586
11	15	WP	RWA-ABCD	28	24	4	0.857143	0.0454		28	20	8	0.714286	-0.0874		28	3	25	0.107143	-0.2128		28	26	2	0.928571	0.1505		28	26	2	0.857143	-0.0265
15	16	WP	RWA-ABCD	24	22	2	0.916667	-0.1329		24	22	2	0.916667	-0.5189		24	5	19	0.208333	0.0448		24	24	0	1	-0.2079		24	22	2	0.923077	0.0177
1	23	WP	AnAXE1	25	20	5	0.8	0.2166		25	18	7	0.72	-0.0996		25	3	22	0.12	-0.18		25	21	4	0.84	0.5948		26	24	2	0.0833333	-0.0061
5	24	WP	AnAXE1	26	24	2	0.923077	-0.1521		26	16	10	0.615385	0.1235		26	4	22	0.153846	-0.0939		26	25	1	0.961538	-0.015		26	23	3	1	0.1368
8	25	WP	AnAXE1	28	24	4	0.857143	0.0454		28	17	11	0.607143	0.141		28	4	24	0.142857	-0.1219		28	28	0	1	-0.2079		28	26	2	0.851852	-0.0265
10	26	WP	AnAXE1	27	25	2	0.925926	-0.1607		27	17	10	0.62963	0.0931		27	3	24	0.111111	-0.2027		27	25	2	0.925926	0.1637		27	24	3	0.928571	0.1209
11	30	WP	HjAXE	10	10	0	1	-0.3826		10	9	1	0.9	-0.4834		10	5	5	0.5	0.7872		10	10	0	1	-0.2079		10	10	0	0.928571	-0.292
14B	31	WP	HjAXE	27	24	3	0.888889	-0.0497		27	12	15	0.444444	0.4879		27	3	24	0.111111	-0.2027		27	26	1	0.962963	-0.0221		27	25	2	0.888889	-0.0167
14C	32	WP	HjAXE	28	20	8	0.714286	0.4735		28	17	11	0.607143	0.141		28	5	23	0.178571	-0.0309		28	28	0	1	-0.2079		28	26	2	1	-0.0265
				Acetyl-salicin (p.a.)						Acetyl-salicortin (p.a.)						Acetyl-tremulacin (p.a.)						Arachidonic acid (p.a.)						Benzoic acid (p.a.)						Caffeic acid (p.a.)
Line	Genotype ID	Promoter	Transgene	N	mean	s.e.	Abs(Dif)-LSD	p		N	mean	s.e.	Abs(Dif)-LSD	p		N	mean	s.e.	Abs(Dif)-LSD	p		N	mean	s.e.	Abs(Dif)-LSD	p		N	mean	s.e.	Abs(Dif)-LSD	p		N	mean	s.e.	Abs(Dif)-LSD	p
10	17	35S	RWA-CD	4	572.25	178.597	-7946	1		4	463076	43234.6	-100000	0.9805		4	1755.75	569.185	-10000	1		4	5614	236.337	168.4	0.0197		4	9050.25	1737.22	-5281	1		4	607604	38589.3	-100000	0.9999
21	18	35S	RWA-CD	4	755.75	79.2037	-7806	1		4	453018	29601	-200000	0.9953		4	2608.25	490.112	-10000	1		4	5759.75	169.18	22.65	0.0444		4	9743	801.871	-4588	1		4	623489	18522.2	-100000	0.9888
22	19	35S	RWA-CD	3	643.667	346.725	-8557	1		4	1.3772e+06	129679	800000	<.0001		4	27994.8	4853.99	12876	<.0001		4	5838	271.592	-55.6	0.0666		4	23740	2443.26	9409	<.0001		4	600299	79412	-100000	1
4	20	35S	AnAXE1	3	634	76.2168	-8566	1		4	423448	25892.3	-200000	1		4	10847.8	2663.78	-4271	0.4557		4	6482.75	97.3998	-700	0.7357		4	10611.5	884.721	-3720	0.9894		4	612949	33529	-100000	0.9992
8	21	35S	AnAXE1	4	1033	282.298	-7529	1		4	416044	11084.3	-200000	1		4	7671.5	1766.74	-7448	0.962		4	6811.25	642.507	-1029	0.9968		4	9746	1138.27	-4585	1		4	602813	35217.2	-100000	1
17	22	35S	AnAXE1	4	891	137.915	-7671	1		4	372396	40576.6	-200000	1		4	14201.5	3631.51	-918	0.0878		4	5960	344.128	-178	0.12		4	7661	463.346	-4387	1		4	585944	23164.6	-100000	1
9	27	35S	HjAXE	5	610	107.326	-7543	1		5	404505	64427.8	-200000	1		5	4197.2	792.324	-10000	1		5	5706.4	163.501	150.6	0.0209		5	7497.4	655.901	-3940	0.9995		5	615278	28407.5	-100000	0.9971
13	28	35S	HjAXE	3	753	303.308	-8447	1		4	334218	21608	-200000	0.9996		4	1165	286.853	-9968	1		4	5794.5	192.006	-12.1	0.0533		4	6618.75	742.003	-3345	0.9458		4	629636	20813.7	-100000	0.9678
22	29	35S	HjAXE	3	232.333	38.9416	-8245	1		4	240682	4750.27	-70000	0.3884		4	1041	271.874	-9844	1		4	6342.75	233.818	-560	0.517		4	6247.25	853.205	-2974	0.8494		4	656680	13543.5	-70000	0.6659
WT	0	none	none	4	594	152.978	-7968	1		4	387394	27261.6	-200000	1		4	3158.25	916.007	-10000	1		4	7235.25	448.624	-1453	1		4	8802.5	508.017	-5529	1		4	573803	27784.7	-200000	1
25	33	WP	GUS	4	540.25	194.418	-7914	1		4	418816	37116	-200000	1		4	3150.5	1111.98	-10000	1		4	5966.75	421.838	-184	0.1238		4	7236.5	792.991	-3963	0.9977		4	571970	43691.9	-100000	1
27	34	WP	GUS	4	738	81.0802	-7824	1		4	421032	16708.5	-200000	1		4	2570.75	565.609	-10000	1		4	6059.75	233.952	-277	0.1863		4	8252.75	980.326	-4979	1		4	584838	48332.9	-100000	1
11	15	WP	RWA-ABCD	4	1268.25	382.966	-7294	1		4	340410	24379	-200000	0.9999		4	1674.5	331.188	-10000	1		4	5573.25	344.333	209.2	0.0156		4	6826	620.138	-3552	0.9758		4	570823	43376.8	-100000	1
15	16	WP	RWA-ABCD	4	826.5	128.582	-7735	1		4	248684	16868.9	-80000	0.4625		4	1649	533.404	-10000	1		4	5906.25	247.05	-124	0.0932		4	8495.5	779.35	-5222	1		4	510566	24374	-90000	0.9179
1	23	WP	AnAXE1	4	948.5	115.144	-7613	1		4	434657	62162.3	-200000	0.9999		4	4756.75	1285.66	-10000	1		4	6055.25	78.3968	-273	0.1828		4	8271.75	444.509	-4998	1		4	588145	22713.7	-100000	1
5	24	WP	AnAXE1	4	541	126.363	-7915	1		4	343960	19829.1	-200000	1		4	1525	271.259	-10000	1		4	6560.5	475.166	-778	0.8453		4	8228	1112.45	-4954	1		4	540531	31493.7	-100000	0.9999
8	25	WP	AnAXE1	3	1090	200.904	-8110	1		3	435658	51626.5	-200000	1		3	2641	848.251	-10000	1		3	6350.67	826.273	-685	0.6317		3	10091	2056.96	-4683	0.9999		3	579177	20780.4	-200000	1
10	26	WP	AnAXE1	4	729.5	235.23	-7832	1		4	425314	20753.6	-200000	1		4	3758.5	548.972	-10000	1		4	6906.25	370.628	-1124	0.9999		4	7196	768.832	-3922	0.997		4	548968	37921.6	-100000	1
11	30	WP	HjAXE	3	17710.7	11539.2	8510	<.0001		4	583772	108753	-20000	0.0993		4	21696.2	10584.9	6577	0.0003		4	6236.5	240.454	-454	0.3679		4	14365.5	3584.31	34.06	0.0477		4	619276	43174.8	-100000	0.9955
14B	31	WP	HjAXE	4	927.25	328.151	-7635	1		4	428128	36246.2	-200000	1		4	2528.5	531.217	-10000	1		4	5704	474.89	78.4	0.0328		4	8132	881.216	-4858	1		4	584488	13810.6	-100000	1
14C	32	WP	HjAXE	4	926	300.52	-7636	1		4	456328	55009	-100000	0.9921		4	3371.5	842.371	-10000	1		4	6512.75	143.247	-730	0.7803		4	7483	1071.24	-4209	0.9997		4	569387	30016.7	-100000	1
				Catechin (p.a.)						Cholic acid (p.a)						Cinnamoyl-salicin (p.a.)						Cinnamoyl-salicortin (p.a.)						HCH-Ac-salicortin (p.a.)						HCH-salicortin (p.a.)
Line	Genotype ID	Promoter	Transgene	N	mean	s.e.	Abs(Dif)-LSD	p		N	mean	s.e.	Abs(Dif)-LSD	p		N	mean	s.e.	Abs(Dif)-LSD	p		N	mean	s.e.	Abs(Dif)-LSD	p		N	mean	s.e.	Abs(Dif)-LSD	p			mean	s.e.	Abs(Dif)-LSD	p
10	17	35S	RWA-CD	4	18347889	806081	-4000000	1		4	987140	35333.2	-100000	1		4	12371	1634.81	-10000	1		4	17989.8	2359.48	-70000	1		4	36215	3033.47	-20000	0.8271		4	2.02731e+06	181591	-1000000	1
21	18	35S	RWA-CD	4	17867752	1.03029e+06	-4000000	1		4	1.0154e+06	28146.8	-100000	1		4	11823	887.372	-10000	1		4	22971.2	2106.17	-70000	1		4	24889.2	1333.46	-30000	1		4	2027109	51843.5	-1000000	1
22	19	35S	RWA-CD	4	12494362	1.95392e+06	1000000	0.0031		4	1.04951e+06	65030.1	-100000	0.9964		4	47484.8	1831.92	22840	<.0001		4	313472	27580.1	200000	<.0001		4	81412.2	16306.2	29493	<.0001		4	3.62052e+06	372457	300000	0.0074
4	20	35S	AnAXE1	4	21868231	265287	-1000000	0.3616		4	1.05105e+06	41061.1	-100000	0.9947		4	9837.5	692.769	-10000	1		4	19650.8	1749.88	-70000	1		4	25159.2	5581.21	-30000	1		4	2697569	184312	-600000	0.5513
8	21	35S	AnAXE1	4	19835211	1.24859e+06	-3000000	0.9994		4	1.02638e+06	50043.1	-100000	1		4	13472.8	557.371	-10000	1		4	26074	2450.44	-70000	1		4	12406	1649.99	-20000	0.9906		4	1.80993e+06	191077	-1000000	1
17	22	35S	AnAXE1	4	19849496	1.00285e+06	-3000000	0.9993		4	998278	49779.9	-100000	1		4	12522.5	2147.24	-10000	1		4	26442.2	7542.79	-70000	1		4	7897.75	2234.16	-20000	0.8269		4	1317785	191244	-1000000	0.9835
9	27	35S	HjAXE	5	19060419	807091	-4000000	1		5	999406	17843.8	-100000	1		5	13874.2	1896.26	-10000	1		5	25487.2	8368.74	-60000	1		5	23906	2403.65	-30000	1		5	1871044	163316	-1000000	1
13	28	35S	HjAXE	4	18482938	457519	-4000000	1		4	1.0061e+06	28949.5	-100000	1		4	8132	440.335	-9162	0.9974		4	12230	2050.91	-70000	1		4	23367.8	3328.81	-30000	1		4	1.57398e+06	124568	-1000000	1
22	29	35S	HjAXE	4	20492476	255086	-3000000	0.9451		4	1.04376e+06	28644.4	-100000	0.9994		4	8187.5	203.506	-9217	0.9979		4	9649	1187.57	-60000	1		4	19500.8	3784.28	-30000	1		4	1.25754e+06	202555	-900000	0.9565
WT	0	none	none	4	18648679	374529	-5000000	1		4	1007541	25447.6	-100000	1		4	11807.5	927.102	-10000	1		4	18967.5	3736.14	-70000	1		4	22058	2472.9	-30000	1		4	1.81995e+06	125727	-1000000	1
25	33	WP	GUS	4	19046302	612435	-4000000	1		4	1.02107e+06	43525	-100000	1		4	14963.8	1426.93	-9681	0.9996		4	19851.8	3096.92	-70000	1		4	22961.5	3619.68	-30000	1		4	1.75833e+06	127295	-1000000	1
27	34	WP	GUS	4	18829227	818744	-4000000	1		4	1022908	22097.7	-100000	1		4	12967.5	732.36	-10000	1		4	18844.5	986.219	-70000	1		4	28862.2	3284.12	-20000	0.9999		4	1.86983e+06	232336	-1000000	1
11	15	WP	RWA-ABCD	4	18313916	589275	-4000000	1		4	1.001e+06	22218.5	-100000	1		4	10148.2	480.207	-10000	1		4	16728.2	638.221	-70000	1		4	18813.5	1647.15	-30000	1		4	1784555	198411	-1000000	1
15	16	WP	RWA-ABCD	4	20366134	463266	-3000000	0.9687		4	987028	18311.7	-100000	1		4	14046	1442.67	-10000	1		4	21832	3609.01	-70000	1		4	21211.8	5762.69	-30000	1		4	1.50268e+06	140688	-1000000	0.9999
1	23	WP	AnAXE1	4	19342299	101775	-4000000	1		4	1011874	30322.4	-100000	1		4	13770.2	1679.95	-10000	1		4	25035.8	5398.68	-70000	1		4	24489.5	2562.36	-30000	1		4	2.09066e+06	150066	-1000000	1
5	24	WP	AnAXE1	4	20682994	225248	-3000000	0.8925		4	1.0311e+06	36833.3	-100000	1		4	11637	1291.44	-10000	1		4	17528.2	1855.03	-70000	1		4	22603.2	1683.96	-30000	1		4	1.90554e+06	111716	-1000000	1
8	25	WP	AnAXE1	3	19634073	193372	-4000000	1		3	987378	14436.9	-100000	1		3	12501.3	2573.72	-10000	1		3	22131.7	4738.25	-80000	1		3	25737.7	2995.61	-30000	1		3	1973281	161282	-1000000	1
10	26	WP	AnAXE1	4	18729084	805316	-5000000	1		4	1.01651e+06	11376.3	-100000	1		4	13917.5	930.167	-10000	1		4	25275.8	2103.86	-70000	1		4	23429.5	3640.44	-30000	1		4	1617963	170979	-1000000	1
11	30	WP	HjAXE	4	11587801	3.49573e+06	2000000	0.0004		4	1003709	22916.8	-100000	1		4	31099.5	12389.1	6455	0.0005		4	162748	71324.2	71033	<.0001		4	91454	23710.3	39534	<.0001		4	4.44028e+06	1.35518e+06	1000000	<.0001
14B	31	WP	HjAXE	4	18485956	611379	-4000000	1		4	1003993	24060.3	-100000	1		4	14524.5	1091.46	-10000	1		4	22088.8	1700.37	-70000	1		4	25951.2	1755.01	-30000	1		4	1.73558e+06	73124.9	-1000000	1
14C	32	WP	HjAXE	4	18280209	866527	-4000000	1		4	997519	32315.8	-100000	1		4	14775.2	2182.19	-9869	0.9998		4	27853.5	6356.5	-60000	1		4	24289.2	5611.04	-30000	1		4	1.6451e+06	243009	-1000000	1
				HCH-Tremulacin (p.a.)						OH-tremuloidin (p.a.)						p-coumaric acid (p.a.)						Phenylalanine (p.a.)						Salicin (p.a.)
Line	Genotype ID	Promoter	Transgene	N	mean	s.e.	Abs(Dif)-LSD	p		N	mean	s.e.	Abs(Dif)-LSD	p		N	mean	s.e.	Abs(Dif)-LSD	p		N	mean	s.e.	Abs(Dif)-LSD	p		N	mean	s.e.	Abs(Dif)-LSD	p
10	17	35S	RWA-CD	4	751026	55024.7	-500000	1		4	290484	27650.7	-100000	1		4	70856.2	4003.86	-20000	0.9927		4	73638	963.655	-5974	1		4	4.38652e+06	511813	-3000000	0.8865
21	18	35S	RWA-CD	4	807814	23608.7	-500000	1		4	326266	10856	-100000	1		4	74339.2	3559.03	-30000	1		4	75330.8	1801.33	-4281	0.9925		4	4880917	410782	-3000000	0.981
22	19	35S	RWA-CD	4	1.75858e+06	132488	300000	0.0003		4	688786	74686.4	200000	<.0001		4	44438	4893.61	4476	0.0161		4	73962	2579.96	-5650	1		4	10759684	1452042	-1000000	0.2636
4	20	35S	AnAXE1	4	1.15776e+06	126544	-300000	0.7367		4	424831	15669.9	-20000	0.1427		4	98133.2	6976.84	-10000	0.6953		4	75187.5	1495.64	-4424	0.9966		4	6.67589e+06	1.16969e+06	-5000000	1
8	21	35S	AnAXE1	4	779756	75158.2	-500000	1		4	358371	26321.1	-90000	0.9258		4	94491	11702.5	-20000	0.9132		4	74223	1119.61	-5389	1		4	5.91283e+06	1.06192e+06	-5000000	1
17	22	35S	AnAXE1	4	766838	49033.4	-500000	1		4	353913	31114.4	-90000	0.9571		4	159311	23397.1	46307	<.0001		4	70749.5	1443.46	-3661	0.9224		4	10287741	2.24248e+06	-2000000	0.417
9	27	35S	HjAXE	5	911190	87114.2	-500000	1		5	427973	51574.1	-10000	0.0902		5	70252.4	3960.97	-20000	0.9788		5	73331.2	1165.91	-5921	1		5	6.90436e+06	1.18397e+06	-5000000	1
13	28	35S	HjAXE	4	625832	68575.3	-400000	0.9459		4	345894	52109.5	-100000	0.9884		4	63684	3932.22	-10000	0.6882		4	71752.8	1179.6	-4664	0.9994		4	3.85905e+06	143037	-2000000	0.6886
22	29	35S	HjAXE	4	517150	83198.5	-200000	0.5912		4	432753	25751.4	-10000	0.1006		4	75449.5	1309.78	-30000	1		4	73193.8	762.998	-6105	1		4	5530706	876374	-4000000	0.9999
WT	0	none	none	4	856067	36552.1	-600000	1		4	295890	10348.2	-200000	1		4	80959	7636.74	-30000	1		4	73350.2	828.699	-6262	1		4	6744223	1.65062e+06	-5000000	1
25	33	WP	GUS	4	847601	71097.9	-600000	1		4	308935	29832.6	-100000	1		4	89364	11065.8	-20000	0.9991		4	74224.8	1220.53	-5387	1		4	7106864	1.7968e+06	-5000000	1
27	34	WP	GUS	4	861491	92758.2	-600000	1		4	282827	7051.06	-100000	1		4	76932.8	3177.12	-30000	1		4	72975.2	354.113	-5887	1		4	5.11662e+06	1.11442e+06	-4000000	0.995
11	15	WP	RWA-ABCD	4	727966	86114.9	-500000	0.9999		4	258894	20419.9	-100000	0.9996		4	73472	5027.01	-20000	0.9998		4	74231.2	2494.67	-5381	1		4	3.89883e+06	324597	-3000000	0.7054
15	16	WP	RWA-ABCD	4	767398	64458.4	-500000	1		4	362380	33011.2	-80000	0.8886		4	78727.8	2537.42	-30000	1		4	74704	801.526	-4908	0.9999		4	4501696	710629	-3000000	0.9178
1	23	WP	AnAXE1	4	973558	115401	-500000	1		4	343292	35658.7	-100000	0.9932		4	75626.8	5462.62	-30000	1		4	75912	1642.46	-3700	0.9301		4	5.90367e+06	1.3904e+06	-5000000	1
5	24	WP	AnAXE1	4	771543	56458.3	-500000	1		4	282712	14403.9	-100000	1		4	82318.8	2637.71	-30000	1		4	75017	906.073	-4595	0.9989		4	3.51073e+06	119809	-2000000	0.54
8	25	WP	AnAXE1	3	869477	100382	-600000	1		3	317331	36833.4	-100000	1		3	66883.3	4881.91	-20000	0.933		3	74013.7	1965.95	-6100	1		3	5759091	1.20294e+06	-5000000	1
10	26	WP	AnAXE1	4	793988	48172.1	-500000	1		4	309372	21821.8	-100000	1		4	77065.8	2602.16	-30000	1		4	75213.2	1224.28	-4399	0.9961		4	7194132	1.7363e+06	-5000000	1
11	30	WP	HjAXE	4	2.55759e+06	515610	1000000	<.0001		4	421478	56591.4	-30000	0.1644		4	56409.8	7078.42	-7496	0.2406		4	73314.5	1656.85	-6226	1		4	13071333	2.27196e+06	1000000	0.0112
14B	31	WP	HjAXE	4	739224	34917.8	-500000	1		4	282355	15353.7	-100000	1		4	80378.2	4950.47	-30000	1		4	73467.5	1198.16	-6144	1		4	4621610	713474	-3000000	0.9443
14C	32	WP	HjAXE	4	807124	98095.2	-500000	1		4	289049	44252.1	-100000	1		4	81997.2	4074.27	-30000	1		4	72845.5	2193.95	-5757	1		4	7330384	1.04701e+06	-5000000	1
				Salicortin (p.a.)						Salicoyl-tremuloidin (p.a.)							Salicylic acid (p.a.)					Tremulacin (p.a.)						Tremuloidin (p.a.)
Line	Genotype ID	Promoter	Transgene	N	mean	s.e.	Abs(Dif)-LSD	p		N	mean	s.e.	Abs(Dif)-LSD	p		N	mean	s.e.	Abs(Dif)-LSD	p		N	mean	s.e.	Abs(Dif)-LSD	p		N	mean	s.e.	Abs(Dif)-LSD	p
10	17	35S	RWA-CD	4	30879527	2.11074e+06	-10000000	0.9972		4	2837.5	772.943	-5902	1		4	1.17376e+06	46521.6	-200000	1		4	35370372	2.48623e+06	-20000000	1		4	1.28659e+06	145386	-3000000	0.9686
21	18	35S	RWA-CD	4	32537079	892425	-8000000	0.9319		4	3947.75	588.195	-4792	0.9999		4	1.23027e+06	12076.1	-100000	0.994		4	39103848	1.80945e+06	-10000000	1		4	1.54902e+06	158150	-3000000	0.993
22	19	35S	RWA-CD	4	60007784	1.45042e+06	20000000	<.0001		4	17279.5	1030.8	8540	<.0001		4	1.49694e+06	30597.2	200000	<.0001		4	97218759	1.29064e+06	40000000	<.0001		4	6.62712e+06	481326	-1000000	0.2789
4	20	35S	AnAXE1	4	30364714	928467	-10000000	0.9995		4	3484.25	396.393	-5255	1		4	1.19599e+06	33989.9	-100000	1		4	40938149	1.64168e+06	-10000000	0.9961		4	2.6366e+06	861377	-4000000	1
8	21	35S	AnAXE1	4	31491292	998094	-9000000	0.9875		4	3747.25	467.689	-4992	1		4	1.15103e+06	19199.1	-100000	1		4	40920287	458100	-10000000	0.9962		4	2.27075e+06	566739	-4000000	1
17	22	35S	AnAXE1	4	21677056	3.32751e+06	-9000000	0.9675		4	3323.75	878.44	-5416	1		4	1118880	24274.7	-100000	0.9676		4	35570129	2.75572e+06	-20000000	1		4	7026540	2.82059e+06	-900000	0.1712
9	27	35S	HjAXE	5	30036139	3.29887e+06	-10000000	0.9997		5	2376.4	943.314	-5566	1		5	1.13936e+06	30159.2	-100000	0.9993		5	40509797	3.54225e+06	-10000000	0.9971		5	2.98597e+06	702266	-4000000	1
13	28	35S	HjAXE	4	27241408	763970	-10000000	1		4	1156	117.773	-4659	0.9997		4	1057349	35507.9	-40000	0.2703		4	31508932	1.14911e+06	-10000000	0.9999		4	1.08712e+06	52501.5	-3000000	0.9289
22	29	35S	HjAXE	4	24262976	1.28567e+06	-10000000	1		4	484.5	27.2075	-3988	0.9807		4	1.04689e+06	13294.5	-30000	0.186		4	29276388	2.7994e+06	-10000000	0.9865		4	1695964	464081	-3000000	0.9977
WT	0	none	none	4	26846382	1.86338e+06	-10000000	1		4	2618	356.688	-6121	1		4	1.17953e+06	18682.7	-200000	1		4	35456250	2.69388e+06	-20000000	1		4	3.06262e+06	1.09323e+06	-5000000	1
25	33	WP	GUS	4	26789272	1.86055e+06	-10000000	1		4	4032.25	682.648	-4707	0.9998		4	1216103	54021.4	-100000	0.9999		4	35933664	1.90495e+06	-20000000	1		4	3.36538e+06	1.33631e+06	-5000000	1
27	34	WP	GUS	4	29079595	511659	-10000000	1		4	3098.75	203.293	-5641	1		4	1.21374e+06	48681.2	-100000	1		4	39288576	1.16887e+06	-10000000	1		4	2142464	548279	-4000000	1
11	15	WP	RWA-ABCD	4	28567139	600609	-10000000	1		4	2471	221.824	-5974	1		4	1.14148e+06	52748.4	-100000	0.9998		4	33571152	1.46858e+06	-20000000	1		4	1.19733e+06	99775.9	-3000000	0.9534
15	16	WP	RWA-ABCD	4	28276953	2143427	-10000000	1		4	1979.75	260.942	-5483	1		4	953504	25166.6	62145	0.0018		4	37848291	3.0621e+06	-20000000	1		4	1.46897e+06	228976	-3000000	0.9882
1	23	WP	AnAXE1	4	31066775	2.61036e+06	-10000000	0.9953		4	3983.5	920.766	-4756	0.9999		4	1.1799e+06	43420.9	-200000	1		4	41145071	3.50151e+06	-10000000	0.9941		4	2.36986e+06	621900	-4000000	1
5	24	WP	AnAXE1	4	28702592	822440	-10000000	1		4	2259	450.934	-5762	1		4	1142891	12019.4	-100000	0.9999		4	34722829	1.649e+06	-20000000	1		4	1.13155e+06	62100	-3000000	0.9396
8	25	WP	AnAXE1	3	30906895	1.45782e+06	-10000000	0.9988		3	3664.33	1348.44	-5566	1		3	1173812	22958	-200000	1		3	39663010	2.45745e+06	-20000000	1		3	2.12943e+06	440191	-4000000	1
10	26	WP	AnAXE1	4	29746237	1.55158e+06	-10000000	1		4	4147.25	1176.41	-4592	0.9995		4	1201020	36610.7	-100000	1		4	41200815	1.52411e+06	-10000000	0.9935		4	3366577	1016156	-5000000	1
11	30	WP	HjAXE	4	44450537	12553732	4000000	0.0055		4	15237	5725.3	6498	<.0001		4	1403917	90731.1	60507	0.002		4	72940109	17022262	20000000	<.0001		4	8.97272e+06	3.37084e+06	1000000	0.0075
14B	31	WP	HjAXE	4	31337086	907875	-9000000	0.9911		4	3927.75	1023.76	-4812	0.9999		4	1.16843e+06	20543.5	-200000	1		4	39331016	1.76393e+06	-10000000	1		4	1.57016e+06	138778	-3000000	0.9939
14C	32	WP	HjAXE	4	29865682	2.30943e+06	-10000000	0.9999		4	4110	1073.31	-4629	0.9997		4	1.15309e+06	41067.6	-100000	1		4	40796852	2.74002e+06	-10000000	0.9971		4	2.99722e+06	707059	-5000000	1

## Sheet: TabS2 wo abberant lines means
Supplementary material: "Modification of cell wall acetylation affects field performance, phenolic composition of foliage and resistance to biotic stress factors in aspen in a construct-dependent fashion"
By: M. Derba-Maceluch, F. Amini, E.N. Donev, P. M.-A. Pawar, L. Michaud, U. Johansson, B.R. Albrectsen, E. J. Mellerowicz
Table S2. Overview of line means and s.e. after response trait for selected lines (omitting lines with abnormalities and construct WP:RWA-ABCD).
For continuous data, a one-way ANOVA with "line" as fixed effect was performed. Mean of each "line" was compared with WT-mean using Dunnets test (P) and Abs(Dif)-LSD) (fit y by x, means and sd, compare means with Dunnett's). Contrast was used to compare all lines with a given construct to WT. For discrete data, counts are provided and evaluated across all lines and the Persson χ2 provided for the…
					Height-2014 (cm)						Height-2015 (cm)						Height-2016 (cm)						Height-2017 (cm)						Height- final 2018 (cm)
Line	Genotype ID	Promoter	Transgene	N	mean	s.e.	Abs(Dif)-LSD	p	contrast	N	mean	s.e.	Abs(Dif)-LSD	p	contrast	N	mean	s.e.	Abs(Dif)-LSD	p	contrast	N	mean	s.e.	Abs(Dif)-LSD	p	contrast	N	mean	s.e.	Abs(Dif)-LSD	p	contrast
10	17	35S	RWA-CD	25	83	3.34614	-8.62	0.9817		25	106.76	4.46291	-12.1	0.9996		25	164.36	8.71873	-28.9	1		25	278.84	18.4666	-28.1	0.9767		24	298.375	14.6866	-40.6	1
21	18	35S	RWA-CD	28	81.7857	3.57288	-9.32	0.9982		28	108.357	4.27717	-9.92	0.9834		28	158.464	6.20537	-21.9	0.9999		28	276.571	8.81188	-24.2	0.919		28	283.679	8.63809	-23.5	0.896
4	20	35S	AnAXE1	28	76.0357	3.25523	-11.5	1		27	99.2593	3.49015	-12.7	1		27	153.926	8.44303	-17.7	0.9764		27	240.074	10.9883	11.79	0.0038	0.001	27	244.519	11.1233	15.12	0.0017	0.001
8	21	35S	AnAXE1	28	85.6429	3.39242	-5.46	0.656		28	105.179	4.86485	-13.1	1		28	156.893	8.67297	-20.4	0.9988		28	269.107	13.6245	-16.7	0.5786		28	281.107	13.7071	-20.9	0.7934
17	22	35S	AnAXE1	28	81.6071	3.22496	-9.5	0.9989		28	102.964	3.98525	-15.3	1		28	160.321	7.49974	-23.8	1		28	267.893	11.8907	-15.5	0.5139		28	274.143	11.5183	-14	0.4338
9	27	35S	HjAXE	28	85.25	3.73622	-5.85	0.7244		28	104.321	4.9559	-14	1		28	153.464	8.55383	-16.9	0.9633		28	257.143	14.0873	-4.74	0.1179	<.0001	28	260.036	15.0494	0.138	0.0487	<.0001
13	28	35S	HjAXE	28	81.7857	2.74795	-9.32	0.9982		28	105.929	3.19388	-12.3	1		28	147.643	5.37341	-11.1	0.6034		28	247.857	10.1154	4.544	0.0197		28	257.036	9.89702	3.138	0.0267
22	29	35S	HjAXE	28	81.9286	3.317	-9.17	0.9973		28	112.536	4.05142	-5.74	0.5441		28	157.357	6.3156	-20.8	0.9994		28	241.25	9.03105	11.15	0.0043		28	250.107	9.16809	10.07	0.0056
WT	0	none	none	56	77.8393	2.87948	-10.8	1		56	102.518	3.25975	-12.9	1		55	165.018	5.86036	-23.4	1		54	296.352	8.33967	-36.3	1		54	304.296	8.4687	-36.5	1
25	33	WP	GUS	28	84.4643	3.94019	-6.64	0.8456		28	109.286	4.55416	-8.99	0.9435		28	169.214	7.47666	-24.3	1		28	294.607	12.4557	-42.2	1		28	299.321	12.9737	-39.1	1
27	34	WP	GUS	28	77.1429	5.84923	-12.6	1		28	100.179	6.16185	-13.4	1		28	153.964	11.789	-17.4	0.9746		28	276.75	16.8227	-24.3	0.924		28	284.929	16.9465	-24.8	0.9322
1	23	WP	AnAXE1	28	81.5357	4.11459	-9.57	0.9991	0.0384	28	104.643	4.3626	-13.6	1		28	158.25	7.92819	-21.7	0.9999		28	273.893	13.7943	-21.5	0.822		28	281.357	13.2535	-21.2	0.8048
5	24	WP	AnAXE1	28	82.7857	4.19888	-8.32	0.9823		27	116.667	3.9689	-1.8	0.1227		27	178.852	8.54112	-15	0.8778		27	300.815	12.1861	-40	1		27	308.444	12.2858	-40.5	1
8	25	WP	AnAXE1	28	87.75	2.83899	-3.35	0.3088		28	106.036	3.95226	-12.2	0.9999		28	161.536	6.89691	-25	1		28	283.929	9.73225	-31.5	0.9989		28	291.5	9.70525	-31.3	0.9986
10	26	WP	AnAXE1	28	85.9643	2.71069	-5.14	0.5986		28	111.786	3.60128	-6.49	0.6567		28	154.893	8.13304	-18.4	0.9885		27	275.889	9.76305	-24	0.9061		27	282.926	9.45991	-23.3	0.879
14B	31	WP	HjAXE	28	93.2857	3.39384	2.183	0.0108	0.0014	28	115.643	3.75726	-2.63	0.18	0.0208	28	178.714	6.2212	-14.8	0.8762		28	299.286	10.3896	-41	1		28	299.286	14.4957	-39.1	1
14C	32	WP	HjAXE	28	86.25	3.8602	-4.85	0.5477		28	109.821	5.65219	-8.45	0.9032		28	169.571	8.51616	-23.9	1		28	290.357	12.6279	-38	1		28	296.929	12.5961	-36.8	1
					Diameter-2014 (mm)						Diameter-2015 (mm)						Diameter-2016 (mm)						Diameter-2017 (mm)						Diameter-final 2018 (mm)
Line	Genotype ID	Promoter	Transgene	N	mean	s.e.	Abs(Dif)-LSD	p	contrast	N	mean	s.e.	Abs(Dif)-LSD	p	contrast	N	mean	s.e.	Abs(Dif)-LSD	p	contrast	N	mean	s.e.	Abs(Dif)-LSD	p	contrast	N	mean	s.e.	Abs(Dif)-LSD	p	contrast
10	17	35S	RWA-CD	25	5.12	0.145144	-0.42	0.9999		25	9	0.420317	-1.39	1		25	18.44	1.04735	-3.82	1		25	31.96	2.1083	-4.49	0.9999		24	33.2917	1.70409	-5.85	1
21	18	35S	RWA-CD	28	5.25	0.121987	-0.27	0.8797		28	9	0.388322	-1.33	1		28	18.0357	0.92078	-3.49	1		28	32.1429	1.41582	-4.45	1		28	32.1429	1.41582	-4.4	0.9999
4	20	35S	AnAXE1	28	4.82143	0.178571	-0.34	0.9921		27	8.59259	0.393173	-1.3	1		27	17.4444	1.1452	-2.95	0.9999		27	28.9259	1.53025	-1.31	0.264	0.0127	27	28.9259	1.53025	-1.25	0.2494	0.0126
8	21	35S	AnAXE1	28	5.21429	0.107363	-0.31	0.9598		28	8.82143	0.433558	-1.51	1		28	17.1786	1.26099	-2.64	0.9977		28	30.5357	1.78507	-2.85	0.8445		28	30.5357	1.78507	-2.79	0.8292
17	22	35S	AnAXE1	28	5.07143	0.162068	-0.45	1		28	8.67857	0.40517	-1.37	1		28	17.3929	0.940476	-2.85	0.9998		28	29.6786	1.52497	-1.99	0.5088		28	29.8214	1.53535	-2.08	0.5469
9	27	35S	HjAXE	28	5.25	0.189855	-0.27	0.8797		28	8.78571	0.425252	-1.47	1		28	17.9286	1.28784	-3.39	1		28	29.3929	1.77902	-1.7	0.3984	<.0001	28	29.3929	1.77902	-1.65	0.3799	<.0001
13	28	35S	HjAXE	28	4.89286	0.0939898	-0.41	1		28	8.89286	0.415759	-1.44	1		28	15.6786	0.898343	-1.14	0.4003		28	26.1071	1.28106	1.581	0.0033		28	26.1071	1.28106	1.639	0.0029
22	29	35S	HjAXE	28	5.10714	0.165386	-0.41	1		28	9.32143	0.408422	-1.01	0.9943		28	16.8571	0.893413	-2.32	0.9745		28	27.25	1.2865	0.438	0.0252		28	27.25	1.2865	0.496	0.0229
WT	0	none	none	56	5	0.111075	-0.43	1		56	8.82143	0.292889	-1.23	1		55	18.3273	0.771572	-3.11	1		54	33.3704	1.0432	-4.7	1		54	33.4074	1.04025	-4.68	1
25	33	WP	GUS	28	5.17857	0.145965	-0.34	0.9921		28	9.10714	0.386064	-1.22	1		28	18.2143	0.897317	-3.67	1		28	32.8214	1.44846	-5.13	1		28	32.6429	1.39084	-4.9	1
27	34	WP	GUS	28	5.07143	0.170034	-0.45	1		28	8.14286	0.41695	-0.83	0.9209		28	16.4286	1.17111	-1.89	0.8409		28	30	1.83946	-2.31	0.6419		28	30	1.83946	-2.25	0.6214
1	23	WP	AnAXE1	28	5.07143	0.125236	-0.45	1		28	8.42857	0.365252	-1.12	0.9996		28	17.1786	0.997422	-2.64	0.9977		28	30.6786	1.70438	-2.99	0.8863		28	30.6786	1.70438	-2.93	0.8734
5	24	WP	AnAXE1	28	5	0.16265	-0.52	1		27	10.1111	0.545203	-0.24	0.1659		27	19.9259	1.18144	-2.23	0.9542		27	35.3333	1.95024	-3.79	0.9921		27	35.3333	1.95024	-3.8	0.9932
8	25	WP	AnAXE1	28	5.5	0.096225	-0.02	0.0706		28	9.39286	0.446442	-0.94	0.9797		28	18.6071	0.975004	-3.51	1		28	32.6429	1.36782	-4.95	1		28	32.6429	1.36782	-4.9	1
10	26	WP	AnAXE1	28	5.21429	0.139511	-0.31	0.9598		28	9.28571	0.439026	-1.04	0.9974		28	17.2143	1.07196	-2.67	0.9984		27	31.7037	1.37314	-4.08	0.9986		27	31.7037	1.37314	-4.03	0.9981
14B	31	WP	HjAXE	28	5.46429	0.140691	-0.06	0.12	0.0035	28	9.60714	0.452329	-0.72	0.8052		28	19.6429	1.06807	-2.47	0.9907		28	34.1786	1.57111	-4.87	1		28	33.5714	1.89989	-5.5	1
14C	32	WP	HjAXE	28	5.39286	0.129501	-0.13	0.2983		28	9.32143	0.433558	-1.01	0.9943		28	19.0357	1.06468	-3.08	1		28	33.3571	1.57545	-5.67	1		28	33.3571	1.57545	-5.61	1
0					Volume-2014 (cm3)						Volume-2015 (cm3)						Volume- 2016 (cm3)						Volume-2017 (cm3)						Volume-final 2018 (cm3)
Line	Genotype ID	Promoter	Transgene	N	mean	s.e.	Abs(Dif)-LSD	p	contrast	N	mean	s.e.	Abs(Dif)-LSD	p	contrast	N	mean	s.e.	Abs(Dif)-LSD	p	contrast	N	mean	s.e.	Abs(Dif)-LSD	p	contrast	N	mean	s.e.	Abs(Dif)-LSD	p	contrast
10	17	35S	RWA-CD	28	5.36389	0.569622	-1.73	1		28	22.7906	3.05597	-10.35	1		28	156.403	23.5798	-68.5	0.9999		28	835.957	115.607	-268	0.9991		28	854.977	117.032	-267	0.9983
21	18	35S	RWA-CD	28	6.15861	0.449059	-1.065	0.9627		28	25.7825	2.71452	-9.85	1		28	155.639	19.0415	-67.5	0.9999		28	829.28	87.368	-261.5	0.9982		28	848.208	88.1024	-260	0.9967
4	20	35S	AnAXE1	28	5.05213	0.377242	-1.42	1		28	20.8697	2.78342	-8.45	0.9993		28	151.104	25.7742	-63	0.9988		28	597.467	81.9174	-29.65	0.0955	0.0161	28	607.208	82.9784	-19.2	0.076	0.0153
8	21	35S	AnAXE1	28	6.33028	0.445347	-0.895	0.84		28	24.8945	3.29542	-10.75	1		28	163.734	31.8612	-75.5	1		28	807.828	126.778	-240	0.9887		28	841.235	130.451	-253	0.9941
17	22	35S	AnAXE1	28	5.8632	0.507073	-1.36	0.9998		28	23.0577	2.70722	-10.65	1		28	151.045	19.0958	-63	0.9988		28	726.16	86.0569	-158.5	0.6876		28	746.831	87.5066	-159	0.6718
9	27	35S	HjAXE	28	6.75558	0.666951	-0.47	0.3229		28	24.5899	3.05928	-11.05	1		28	172.816	29.4493	-85	1		28	731.291	103.393	-163.5	0.7192	0.0003	28	743.08	104.357	-155	0.6486	0.0002
13	28	35S	HjAXE	28	5.25109	0.321207	-1.62	1		28	24.5231	2.94542	-11.1	1		28	112.352	15.7074	-24.35	0.3508		28	512.309	66.1178	55.5	0.0126		28	528.657	67.1042	59.35	0.0118
22	29	35S	HjAXE	28	6.03693	0.477763	-1.185	0.9928		28	28.5207	2.89819	-7.15	0.9759		28	138.144	20.2709	-50	0.94		28	532.736	64.2195	35.06	0.0215		28	551.483	66.1197	36.5	0.0211
WT	0	none	none	56	5.42842	0.385829	-1.465	1		56	24.0396	2.03252	-9.5	1		56	176.36	18.7334	-72	1		56	940.033	77.9913	-304	1		56	967.418	80.1323	-310	1
25	33	WP	GUS	28	6.31747	0.491025	-0.905	0.8527		28	26.523	2.58156	-9.1	1		28	169.42	18.6384	-81.5	1		28	932.727	85.7813	-365	1		28	934.465	81.9711	-346.5	1
27	34	WP	GUS	28	5.8904	0.607657	-1.335	0.9997		28	21.0491	2.51229	-8.6	0.9997		28	151.646	23.5572	-63.5	0.9991		28	827.809	105.643	-260	0.9979		28	849.661	107.329	-261.5	0.9971
1	23	WP	AnAXE1	28	5.67555	0.459899	-1.55	1		28	22.0891	2.84481	-9.65	1		28	149.803	20.5325	-62	0.998		28	818.958	104.884	-251	0.9953		28	835.198	105.435	-247	0.9906
5	24	WP	AnAXE1	28	5.84442	0.493837	-1.38	0.9999		28	34.9938	5.40364	-0.655	0.0795		28	219.844	37.2403	-44.85	0.858		28	1115.56	168.105	-196.5	0.891		28	1144.95	174.803	-202	0.8964
8	25	WP	AnAXE1	28	7.05818	0.375917	-0.165	0.105		28	27.9111	3.56569	-7.75	0.9939		28	172.945	25.2084	-85	1		28	882.536	103.446	-314.5	1		28	904.355	105.602	-316.5	1
10	26	WP	AnAXE1	28	6.43971	0.470018	-0.785	0.7135		28	28.5583	3.61519	-7.1	0.9741		28	147.71	17.686	-59.5	0.9954		28	781.581	90.1103	-214	0.9468		28	798.846	90.8821	-211	0.9272
14B	31	WP	HjAXE	28	7.64982	0.560013	0.426	0.0051	0.0002	28	31.5632	4.22759	-4.085	0.5144		28	211.128	31.4434	-53.5	0.9716		28	1032.85	122.765	-279.5	0.9998		28	1049.74	126.208	-297	1
14C	32	WP	HjAXE	28	6.91333	0.546801	-0.31	0.187		28	28.8666	3.20342	-6.8	0.9556		28	191.926	21.1536	-73	1		28	963.239	93.0749	-349	1		28	983.298	94.4756	-363.5	1
					Weight of 1 leaf (g)						Apical Dominance 2017						Branching 2017						Chlorophyll 2017						Condensed tannins (mg/g DW)
Line	Genotype ID	Promoter	Transgene	N	mean	s.e.	Abs(Dif)-LSD	p	contrast	N	mean	s.e.	Abs(Dif)-LSD	p	contrast	N	mean	s.e.	Abs(Dif)-LSD	p	contrast	N	mean	s.e.	Abs(Dif)-LSD	p	contrast	N	mean	s.e.	Abs(Dif)-LSD	p	contrast
10	17	35S	RWA-CD	14	0.0912298	0.0036078	-0.01	0.7913		14	7.07143	0.578595	-1.38	0.9983		14	30.2857	0.714286	-1.97	0.8315		14	12.131	0.190632	-0.19	0.2241	0.0044	14	106.574	8.14213	-16.5	0.9996
21	18	35S	RWA-CD	14	0.0826751	0.0021615	-0.01	0.9999		14	6.71429	0.558929	-1.74	1		14	28.8571	1.13804	-3.4	1		14	12.1349	0.303873	-0.18	0.218		14	101.649	5.42961	-11.6	0.8743
4	20	35S	AnAXE1	13	0.0779286	0.0033831	-0.004	0.5192		14	6.78571	0.566254	-1.67	1		14	28.1429	1.25294	-3.83	1		14	9.98651	0.285288	0.478	0.0002		14	130.304	9.66804	-4.13	0.2011	0.0002
8	21	35S	AnAXE1	14	0.0861201	0.0032135	-0.01	1		14	7.14286	0.533052	-1.31	0.9942		14	29.1429	1.09874	-3.11	1		14	11.6214	0.240621	-0.7	0.9998		14	130.166	5.80521	-4.26	0.2094
17	22	35S	AnAXE1	14	0.0811412	0.003831	-0.01	0.9802		14	7.64286	0.357143	-0.81	0.658		14	28.2857	1.1972	-3.97	1		14	11.2095	0.297627	-0.75	1		14	141.199	5.55028	6.769	0.0026
9	27	35S	HjAXE	16	0.0770209	0.0036045	-0.002	0.2626	<.0001	15	5.6	0.688684	-1.01	0.8875		15	28.3333	1.18187	-3.83	1		15	10.7493	0.319276	-0.26	0.3783	<.0001	15	104.138	5.13144	-13.6	0.9798	0.0431
13	28	35S	HjAXE	15	0.0742321	0.0027196	0.0001	0.0462		14	6.64286	0.550795	-1.81	1		14	29.5714	0.970523	-2.68	0.995		14	9.26627	0.285038	1.198	<.0001		14	94.477	3.61968	-4.41	0.2182
22	29	35S	HjAXE	14	0.0705911	0.003072	0.003	0.0024		14	6.35714	0.598599	-1.81	1		14	30.2857	0.714286	-1.97	0.8315		14	9.05159	0.245861	1.413	<.0001		14	103.706	3.36138	-13.6	0.974
WT	0	none	none	27	0.0853405	0.0020323	-0.01	1		28	6.5	0.41627	-1.6	1		28	28.2857	0.861979	-3.24	1		28	11.3913	0.182233	-0.76	1		27	112.25	3.02139	-18.3	1
25	33	WP	GUS	14	0.0817076	0.0034417	-0.01	0.995		15	7.26667	0.419372	-1.14	0.9646		15	27.8	1.49666	-3.39	1		15	10.8926	0.210571	-0.41	0.7367	0.0447	14	105.073	6.33073	-15	0.9949
27	34	WP	GUS	14	0.0810692	0.0030616	-0.01	0.9771		14	7.64286	0.225006	-0.81	0.658		14	29.8571	0.906976	-2.4	0.9681		14	10.8571	0.200627	-0.39	0.6778		14	104.486	5.20958	-14.4	0.9889
1	23	WP	AnAXE1	14	0.0832799	0.0031985	-0.01	1		14	6.35714	0.607708	-1.81	1		14	28.1429	1.25294	-3.83	1		13	11.4132	0.308298	-0.93	1		14	113.273	4.29205	-21.2	1
5	24	WP	AnAXE1	13	0.087156	0.0033334	-0.01	1		14	6.35714	0.651348	-1.81	1		14	30.2857	0.714286	-1.97	0.8315		14	11.5298	0.198755	-0.79	1		14	116.441	7.26094	-18	1
8	25	WP	AnAXE1	13	0.0839724	0.002884	-0.01	1		13	5.38462	0.780684	-0.89	0.7227		13	29	1.06217	-3.35	1		13	11.3085	0.27056	-0.87	1		13	127.242	7.47799	-7.74	0.4804
10	26	WP	AnAXE1	14	0.0766886	0.0020894	-0.003	0.2673		14	7.71429	0.163363	-0.74	0.5718		14	29.5714	0.970523	-2.68	0.995		14	11.3774	0.313528	-0.91	1		14	117.349	7.5987	-17.1	0.9999
14B	31	WP	HjAXE	14	0.0851671	0.0036817	-0.01	1		14	7	0.480384	-1.46	0.9996		14	28.2857	1.28571	-3.97	1		14	11.431	0.158879	-0.89	1		14	102.282	4.195	-12.2	0.9155
14C	32	WP	HjAXE	14	0.0834012	0.002293	-0.01	1		14	6.78571	0.493681	-1.67	1		14	29.5714	0.970523	-2.68	0.995		14	11.4563	0.226535	-0.86	1		14	110.122	8.57145	-20.1	1
					Hare (0/1)			Model χ2=20.203 n.s.			Multiple hare (0/1)		Model χ2=14,231 n.s.				Injury (0/1)			Model χ2=14,296 n.s.			Multiple injury (0/1)			. Model χ2=12.047 n.s.			Survival Rate (0/1)			Model χ2=30.199 *
Line	Genotype ID	Promoter	Transgene	N	N(no)	N(yes)	F(All): 0,663	c1	p<0,05	N	N(no)	N(yes)	F(All): 0,925	c1	p<0,05	N	N(no)	N(yes)	F(All): 0,732	c1	p<0,05	N	N(no)	N(yes)	F(All): 0,93	c1	p<0,05	N	N(no)	N(yes)	F(All): 0,02	c1	p<0,05
10	17	35S	RWA-CD	28	20	8	0.714286	-0.1091		28	27	1	0.964286	-0.1503		28	18	10	0.642857	0.2016		28	26	2	0.928571	-0.0076		28	4	24	0.142857	0.8821	*
21	18	35S	RWA-CD	28	20	8	0.714286	-0.1091		28	27	1	0.964286	-0.1503		28	19	9	0.678571	0.121		28	28	0	1	-0.2815		28	0	28	0	-0.1423
4	20	35S	AnAXE1	28	19	9	0.678571	-0.0336		28	27	1	0.964286	-0.1503		28	25	3	0.892857	-0.3629		28	28	0	1	-0.2815		28	1	27	0.0357143	0.1138
8	21	35S	AnAXE1	28	17	11	0.607143	0.1175		28	26	2	0.928571	-0.015		28	22	6	0.785714	-0.121		28	26	2	0.928571	-0.0076		28	0	28	0	-0.1423
17	22	35S	AnAXE1	28	24	4	0.857143	-0.4113		28	28	0	1	-0.2856		28	23	5	0.821429	-0.2016		28	27	1	0.964286	-0.1445		28	0	28	0	-0.1423
9	27	35S	HjAXE	28	18	10	0.642857	0.042		28	26	2	0.928571	-0.015		28	22	6	0.785714	-0.121		28	25	3	0.892857	0.1293		28	0	28	0	-0.1423
13	28	35S	HjAXE	28	20	8	0.714286	-0.1091		28	26	2	0.928571	-0.015		28	23	5	0.821429	-0.2016		28	26	2	0.928571	-0.0076		28	0	28	0	-0.1423
22	29	35S	HjAXE	28	17	11	0.607143	0.1175		28	26	2	0.928571	-0.015		28	20	8	0.714286	0.0403		28	27	1	0.964286	-0.1445		28	0	28	0	-0.1423
WT	0	none	none	56	34	22	0.607143	0.1175		56	50	6	0.892857	0.1202		56	36	20	0.642857	0.2016		56	50	6	0.892857	0.1293		56	2	54	0.0357143	0.1138
25	33	WP	GUS	28	18	10	0.642857	0.042		28	26	2	0.928571	-0.015		28	20	8	0.714286	0.0403		28	24	4	0.857143	0.2663		28	0	28	0	-0.1423
27	34	WP	GUS	28	16	12	0.571429	0.193		28	23	5	0.821429	0.3908		28	19	9	0.678571	0.121		28	24	4	0.857143	0.2663		28	0	28	0	-0.1423
1	23	WP	AnAXE1	28	16	12	0.571429	0.193		28	24	4	0.857143	0.2555		28	18	10	0.642857	0.2016		28	26	2	0.928571	-0.0076		28	0	28	0	-0.1423
5	24	WP	AnAXE1	28	17	11	0.607143	0.1175		28	27	1	0.964286	-0.1503		28	22	6	0.785714	-0.121		28	26	2	0.928571	-0.0076		28	1	27	0.0357143	0.1138
8	25	WP	AnAXE1	28	16	12	0.571429	0.193		28	27	1	0.964286	-0.1503		28	23	5	0.821429	-0.2016		28	27	1	0.964286	-0.1445		28	0	28	0	-0.1423
10	26	WP	AnAXE1	28	19	9	0.678571	-0.0336		28	26	2	0.928571	-0.015		28	20	8	0.714286	0.0403		28	26	2	0.928571	-0.0076		28	1	27	0.0357143	0.1138
14B	31	WP	HjAXE	28	26	2	0.928571	-0.5624	*	28	26	2	0.928571	-0.015		28	20	8	0.714286	0.0403		28	26	2	0.928571	-0.0076		28	1	27	0.0357143	0.1138
14C	32	WP	HjAXE	28	17	11	0.607143	0.1175		28	24	4	0.857143	0.2555		28	19	9	0.678571	0.121		28	25	3	0.892857	0.1293		28	0	28	0	-0.1423
					Chewing 2017 (damage%)						Chlorosis (0/1)			Model χ2=25.53 n.s.			Necrosis (0/1)			Model χ2=195.269 ***			HR (0/1)			Model χ2=24.295 n.s.
Line	Genotype ID	Promoter	Transgene	Number	mean	s.e.	Abs(Dif)-LSD	p	contrast	N	N(no)	N(yes)	F(All): 0.954	c1	p<0,05	N	N(no)	N(yes)	F(All): 0.92	c1	p<0,05	N	N(no)	N(yes)	F(All): 0.834	c1	p<0,05
10	17	35S	RWA-CD	23	6	0.992063	-3.54	1		22	22	0	1	-0.2192		22	22	0	1	-0.302		22	19	3	0.863636	-0.0804
21	18	35S	RWA-CD	28	6.60714	1.06575	-2.64	0.9846		28	26	2	0.928571	0.1224		28	28	0	1	-0.302		28	20	8	0.714286	0.3206
4	20	35S	AnAXE1	27	20.7037	2.30496	11.4	<.0001	<.0001	27	26	1	0.962963	-0.0421		27	24	3	0.888889	0.101		27	23	4	0.851852	-0.0488
8	21	35S	AnAXE1	27	11.3333	1.38469	2.033	0.0003		26	23	3	0.884615	0.3326		26	25	1	0.961538	-0.162		27	26	1	0.962963	-0.3472
17	22	35S	AnAXE1	28	11.7143	1.62313	2.465	<.0001		28	26	2	0.928571	0.1224		28	28	0	1	-0.302		28	22	6	0.785714	0.1288
9	27	35S	HjAXE	27	7.7037	1.10143	-1.6	0.5753	0.0364	26	23	3	0.884615	0.3326		26	23	3	0.884615	0.116		26	24	2	0.923077	-0.2401
13	28	35S	HjAXE	28	6.14286	0.866353	-3.11	0.9997		28	24	4	0.857143	0.464		28	12	16	0.428571	1.766	*	28	26	2	0.928571	-0.2548
22	29	35S	HjAXE	27	8.14815	1.2807	-1.15	0.3452		27	26	1	0.962963	-0.0421		27	12	15	0.444444	1.709	*	27	24	3	0.888889	-0.1483
WT	0	none	none	54	5.07407	0.439054	-3.45	1		54	54	0	1	-0.2192		54	53	1	0.981481	-0.235		54	47	7	0.87037	-0.0985
25	33	WP	GUS	27	5.88889	0.804782	-3.41	1		27	26	1	0.962963	-0.0421		27	27	0	1	-0.302		27	22	5	0.814815	0.0507
27	34	WP	GUS	26	4.92308	0.826341	-4.13	1		26	26	0	1	-0.2192		26	26	0	1	-0.302		26	25	1	0.961538	-0.3434
1	23	WP	AnAXE1	26	6.65385	0.679236	-2.7	0.9838		25	25	0	1	-0.2192		25	25	0	1	-0.302		25	22	3	0.88	-0.1244
5	24	WP	AnAXE1	26	4.57692	0.480938	-3.78	1		26	26	0	1	-0.2192		26	26	0	1	-0.302		26	21	5	0.807692	0.0698
8	25	WP	AnAXE1	28	5.03571	0.901912	-4.14	1		28	25	3	0.892857	0.2932		28	28	0	1	-0.302		28	21	7	0.75	0.2247
10	26	WP	AnAXE1	27	6.33333	0.727952	-2.97	0.9981		27	27	0	1	-0.2192		27	27	0	1	-0.302		27	19	8	0.703704	0.3491
14B	31	WP	HjAXE	27	5.2963	0.551648	-4	1		27	27	0	1	-0.2192		27	26	1	0.962963	-0.168		27	19	8	0.703704	0.3491
14C	32	WP	HjAXE	28	8.25	2.15388	-1	0.2852		28	26	2	0.928571	0.1224		28	28	0	1	-0.302		28	21	7	0.75	0.2247
					Gallers (0/1)			Model χ2=18.173 n.s.			Aphids (0/1)			Model χ2= 21.83 n.s.			Rust (0/1)			Model χ2=35.598 **			Venturia (0/1)			Model χ2= 15.5 n.s.			Miners (0/1)		Model χ2= 18.98 n.s.
Line	Genotype ID	Promoter	Transgene	N	N(no)	N(yes)	F(All): 0.867	c1	p<0,05	N	N(no)	N(yes)	F(All): 0.648	c1	p<0,05	N	N(no)	N(yes)	F(All): 0.179		p<0,05	N	N(no)	N(yes)	F(All): 0.958	c1	p<0,05	N	N(no)	N(yes)	F(All): 0,92	c1	p<0,05
10	17	35S	RWA-CD	22	19	3	0.863636	0.0097		22	14	8	0.636364	0.0242		23	2	21	0.0869565	-0.2409		22	21	1	0.954545	0.0194		23	19	4	0.826087	0.3438
21	18	35S	RWA-CD	28	26	2	0.928571	-0.1815		28	20	8	0.714286	-0.139		28	3	25	0.107143	-0.1883		28	27	1	0.964286	-0.0294		28	24	4	0.857143	0.2296
4	20	35S	AnAXE1	27	24	3	0.888889	-0.0646		27	22	5	0.814815	-0.3494		27	9	18	0.333333	0.4013		27	26	1	0.962963	-0.0228		27	27	0	1	-0.2957
8	21	35S	AnAXE1	26	23	3	0.884615	-0.052		26	14	12	0.538462	0.2292		27	3	24	0.111111	-0.1779		27	26	1	0.962963	-0.0228		27	25	2	0.925926	-0.0233
17	22	35S	AnAXE1	28	22	6	0.785714	0.2392		28	16	12	0.571429	0.1601		28	4	24	0.142857	-0.0952		28	27	1	0.964286	-0.0294		28	28	0	1	-0.2957
9	27	35S	HjAXE	26	25	1	0.961538	-0.2785		26	16	10	0.615385	0.0681		27	8	19	0.296296	0.3047		26	24	2	0.923077	0.177		26	26	0	1	-0.2957
13	28	35S	HjAXE	28	26	2	0.928571	-0.1815		28	18	10	0.642857	0.0106		28	14	14	0.5	0.8357	*	28	27	1	0.964286	-0.0294		28	25	3	0.892857	0.0983
22	29	35S	HjAXE	28	21	7	0.75	0.3443		27	25	2	0.925926	-0.5821		27	7	20	0.259259	0.2082		27	27	0	1	-0.2083		28	27	1	0.964286	-0.1644
WT	0	none	none	54	49	5	0.907407	-0.1191		54	35	19	0.648148	-0.0005		54	7	47	0.12963	-0.1297		54	51	3	0.944444	0.07		54	47	7	0.87037	0.181
25	33	WP	GUS	27	23	4	0.851852	0.0444		27	16	11	0.592593	0.1158		28	3	25	0.107143	-0.1883		27	27	0	1	-0.2083		27	27	0	1	-0.2957
27	34	WP	GUS	26	22	4	0.846154	0.0612		26	18	8	0.692308	-0.0929		27	5	22	0.185185	0.0151		26	25	1	0.961538	-0.0156		27	23	4	0.851852	0.2491
1	23	WP	AnAXE1	25	20	5	0.8	0.1971		25	18	7	0.72	-0.1509		25	3	22	0.12	-0.1548		25	21	4	0.84	0.5932		26	24	2	0.923077	-0.0128
5	24	WP	AnAXE1	26	24	2	0.923077	-0.1653		26	16	10	0.615385	0.0681		26	4	22	0.153846	-0.0666		26	25	1	0.961538	-0.0156		26	23	3	0.884615	0.1286
8	25	WP	AnAXE1	28	24	4	0.857143	0.0289		28	17	11	0.607143	0.0854		28	4	24	0.142857	-0.0952		28	28	0	1	-0.2083		28	26	2	0.928571	-0.033
10	26	WP	AnAXE1	27	25	2	0.925926	-0.1737		27	17	10	0.62963	0.0383		27	3	24	0.111111	-0.1779		27	25	2	0.925926	0.1628		27	24	3	0.888889	0.1129
14B	31	WP	HjAXE	27	24	3	0.888889	-0.0646		27	12	15	0.444444	0.426		27	3	24	0.111111	-0.1779		27	26	1	0.962963	-0.0228		27	25	2	0.925926	-0.0233
14C	32	WP	HjAXE	28	20	8	0.714286	0.4495		28	17	11	0.607143	0.0854		28	5	23	0.178571	-0.0021		28	28	0	1	-0.2083		28	26	2	0.928571	-0.033
				Acetyl-salicin (p.a.)						Acetyl-salicortin (p.a.)						Acetyl-tremulacin (p.a.)						Arachidonic acid (p.a.)						Benzoic acid (p.a.)						Caffeic acid (p.a.)
Line	Genotype ID	Promoter	Transgene	N	mean	s.e.	Abs(Dif)-LSD	p	contrast	N	mean	s.e.	Abs(Dif)-LSD	p	contrast	N	mean	s.e.	Abs(Dif)-LSD	p	contrast	N	mean	s.e.	Abs(Dif)-LSD	p	contrast	N	mean	s.e.	Abs(Dif)-LSD	p	contrast	N	mean	s.e.	Abs(Dif)-LSD	p	contrast
10	17	35S	RWA-CD	4	572.25	178.597	-776	1		4	463076	43234.6	-90000	0.8024		4	1755.75	569.185	-4241	0.9985		4	5614	236.337	133	0.0254	0.0008	4	9050.25	1737.22	-3793	1		4	607604	38589.3	-90000	0.9972
21	18	35S	RWA-CD	4	755.75	79.2037	-636	0.9999		4	453018	29601	-100000	0.9074		4	2608.25	490.112	-5094	1		4	5759.75	169.18	-12.8	0.0532		4	9743	801.871	-3100	0.9993		4	623489	18522.2	-80000	0.9309
4	20	35S	AnAXE1	3	634	76.2168	-822	1		4	423448	25892.3	-100000	0.9995		4	10847.8	2663.78	2046	0.0025	<.0001	4	6482.75	97.3998	-736	0.7257		4	10611.5	884.721	-2232	0.8415		4	612949	33529	-90000	0.9888
8	21	35S	AnAXE1	4	1033	282.298	-359	0.6308		4	416044	11084.3	-100000	1		4	7671.5	1766.74	-1131	0.1886		4	6811.25	642.507	-1064	0.9941		4	9746	1138.27	-3097	0.9992		4	602813	35217.2	-100000	0.9995
17	22	35S	AnAXE1	4	891	137.915	-501	0.9486		4	372396	40576.6	-100000	1		4	14201.5	3631.51	5399	<.0001		4	5960	344.128	-213	0.1329		4	7661	463.346	-2899	0.9945		4	585944	23164.6	-100000	1
9	27	35S	HjAXE	5	610	107.326	-741	1		5	404505	64427.8	-100000	1		5	4197.2	792.324	-4315	0.9999		5	5706.4	163.501	117	0.0267	0.0027	5	7497.4	655.901	-2528	0.9725		5	615278	28407.5	-80000	0.9722
13	28	35S	HjAXE	3	753	303.308	-703	1		4	334218	21608	-100000	0.979		4	1165	286.853	-3651	0.9637		4	5794.5	192.006	-47.5	0.0629		4	6618.75	742.003	-1857	0.6491		4	629636	20813.7	-70000	0.8626
22	29	35S	HjAXE	3	232.333	38.9416	-500	0.8903		4	240682	4750.27	-10000	0.0951		4	1041	271.874	-3527	0.9444		4	6342.75	233.818	-596	0.5188		4	6247.25	853.205	-1486	0.451		4	656680	13543.5	-50000	0.4231
WT	0	none	none	4	594	152.978	-798	1		4	387394	27261.6	-200000	1		4	3158.25	916.007	-5644	1		4	7235.25	448.624	-1488	1		4	8802.5	508.017	-4041	1		4	573803	27784.7	-100000	1
25	33	WP	GUS	4	540.25	194.418	-744	1		4	418816	37116	-100000	0.9999		4	3150.5	1111.98	-5636	1		4	5966.75	421.838	-220	0.1368	0.0071	4	7236.5	792.991	-2475	0.931		4	571970	43691.9	-100000	1
27	34	WP	GUS	4	738	81.0802	-654	1		4	421032	16708.5	-100000	0.9998		4	2570.75	565.609	-5056	1		4	6059.75	233.952	-313	0.1999		4	8252.75	980.326	-3491	1		4	584838	48332.9	-100000	1
1	23	WP	AnAXE1	4	948.5	115.144	-443	0.8503		4	434657	62162.3	-100000	0.9924		4	4756.75	1285.66	-4045	0.9944		4	6055.25	78.3968	-308	0.1964		4	8271.75	444.509	-3510	1		4	588145	22713.7	-100000	1
5	24	WP	AnAXE1	4	541	126.363	-745	1		4	343960	19829.1	-100000	0.9966		4	1525	271.259	-4011	0.9931		4	6560.5	475.166	-814	0.8312		4	8228	1112.45	-3466	1		4	540531	31493.7	-90000	0.9976
8	25	WP	AnAXE1	3	1090	200.904	-366	0.5745		3	435658	51626.5	-100000	0.9955		3	2641	848.251	-5579	1		3	6350.67	826.273	-723	0.6272		3	10091	2056.96	-3076	0.9918		3	579177	20780.4	-100000	1
10	26	WP	AnAXE1	4	729.5	235.23	-662	1		4	425314	20753.6	-100000	0.9992		4	3758.5	548.972	-5044	1		4	6906.25	370.628	-1159	0.9996		4	7196	768.832	-2434	0.9188		4	548968	37921.6	-100000	0.9999
14B	31	WP	HjAXE	4	927.25	328.151	-464	0.8933		4	428128	36246.2	-100000	0.9982		4	2528.5	531.217	-5014	1		4	5704	474.89	42.98	0.0404	0.0126	4	8132	881.216	-3370	1		4	584488	13810.6	-100000	1
14C	32	WP	HjAXE	4	926	300.52	-466	0.8956		4	456328	55009	-90000	0.8771		4	3371.5	842.371	-5431	1		4	6512.75	143.247	-766	0.7683		4	7483	1071.24	-2721	0.9803		4	569387	30016.7	-100000	1
				Catechin (p.a.)						Cholic acid (p.a)						Cinnamoyl-salicin (p.a.)						Cinnamoyl-salicortin (p.a.)						HCH-Ac-salicortin (p.a.)						HCH-salicortin (p.a.)
Line	Genotype ID	Promoter	Transgene	N	mean	s.e.	Abs(Dif)-LSD	p	contrast	N	mean	s.e.	Abs(Dif)-LSD	p	contrast	N	mean	s.e.	Abs(Dif)-LSD	p	contrast	N	mean	s.e.	Abs(Dif)-LSD	p	contrast	N	mean	s.e.	Abs(Dif)-LSD	p	contrast					p	contrast
10	17	35S	RWA-CD	4	18347889	806081	-3000000	1		4	987140	35333.2	-100000	1		4	12371	1634.81	-5277	1		4	17989.8	2359.48	-20000	1		4	36215	3033.47	675.4	0.0344	0.0362	4	2.02731e+06	181591	-500000	0.9911
21	18	35S	RWA-CD	4	17867752	1.03029e+06	-2000000	0.9976		4	1.0154e+06	28146.8	-100000	1		4	11823	887.372	-5825	1		4	22971.2	2106.17	-10000	0.9996		4	24889.2	1333.46	-10000	0.9998		4	2027109	51843.5	-500000	0.9912
4	20	35S	AnAXE1	4	21868231	265287	200000	0.0288	0.0283	4	1.05105e+06	41061.1	-90000	0.9837		4	9837.5	692.769	-3871	0.9745		4	19650.8	1749.88	-20000	1		4	25159.2	5581.21	-10000	0.9994		4	2697569	184312	200000	0.0062
8	21	35S	AnAXE1	4	19835211	1.24859e+06	-2000000	0.9215		4	1.02638e+06	50043.1	-100000	1		4	13472.8	557.371	-4175	0.994		4	26074	2450.44	-10000	0.922		4	12406	1649.99	-3830	0.3008		4	1.80993e+06	191077	-700000	1
17	22	35S	AnAXE1	4	19849496	1.00285e+06	-2000000	0.9154		4	998278	49779.9	-100000	1		4	12522.5	2147.24	-5126	1		4	26442.2	7542.79	-10000	0.8942		4	7897.75	2234.16	678.7	0.0343		4	1317785	191244	-200000	0.293
9	27	35S	HjAXE	5	19060419	807091	-2000000	1		5	999406	17843.8	-100000	1		5	13874.2	1896.26	-3474	0.9465		5	25487.2	8368.74	-10000	0.9371		5	23906	2403.65	-10000	1		5	1871044	163316	-600000	1
13	28	35S	HjAXE	4	18482938	457519	-3000000	1		4	1.0061e+06	28949.5	-100000	1		4	8132	440.335	-2165	0.4572		4	12230	2050.91	-10000	0.945		4	23367.8	3328.81	-10000	1		4	1.57398e+06	124568	-500000	0.9638
22	29	35S	HjAXE	4	20492476	255086	-1000000	0.4875		4	1.04376e+06	28644.4	-100000	0.997		4	8187.5	203.506	-2221	0.4766		4	9649	1187.57	-8670	0.6987		4	19500.8	3784.28	-10000	0.9999		4	1.25754e+06	202555	-100000	0.1801
WT	0	none	none	4	18648679	374529	-3000000	1		4	1007541	25447.6	-100000	1		4	11807.5	927.102	-5841	1		4	18967.5	3736.14	-20000	1		4	22058	2472.9	-10000	1		4	1.81995e+06	125727	-700000	1
25	33	WP	GUS	4	18485956	611379	-3000000	1		4	1003993	24060.3	-100000	1		4	14524.5	1091.46	-3124	0.8089		4	22088.8	1700.37	-10000	1		4	25951.2	1755.01	-9588	0.9933		4	1.73558e+06	73124.9	-600000	1
27	34	WP	GUS	4	18280209	866527	-3000000	1		4	997519	32315.8	-100000	1		4	14775.2	2182.19	-2873	0.7203		4	27853.5	6356.5	-9102	0.7505		4	24289.2	5611.04	-10000	1		4	1.6451e+06	243009	-500000	0.9983
1	23	WP	AnAXE1	4	19342299	101775	-2000000	0.9993		4	1011874	30322.4	-100000	1		4	13770.2	1679.95	-3878	0.9752		4	25035.8	5398.68	-10000	0.9744		4	24489.5	2562.36	-10000	1		4	2.09066e+06	150066	-400000	0.9297
5	24	WP	AnAXE1	4	20682994	225248	-1000000	0.3643		4	1.0311e+06	36833.3	-100000	1		4	11637	1291.44	-5670	1		4	17528.2	1855.03	-20000	1		4	22603.2	1683.96	-10000	1		4	1.90554e+06	111716	-600000	1
8	25	WP	AnAXE1	3	19634073	193372	-2000000	0.9893		3	987378	14436.9	-100000	1		3	12501.3	2573.72	-5615	1		3	22131.7	4738.25	-20000	1		3	25737.7	2995.61	-10000	0.9982		3	1973281	161282	-600000	0.9998
10	26	WP	AnAXE1	4	18729084	805316	-3000000	1		4	1.01651e+06	11376.3	-100000	1		4	13917.5	930.167	-3731	0.9572		4	25275.8	2103.86	-10000	0.9656		4	23429.5	3640.44	-10000	1		4	1617963	170979	-500000	0.993
14B	31	WP	HjAXE	4	19046302	612435	-3000000	1		4	1.02107e+06	43525	-100000	1		4	14963.8	1426.93	-2684	0.6492		4	19851.8	3096.92	-20000	1		4	22961.5	3619.68	-10000	1		4	1.75833e+06	127295	-600000	1
14C	32	WP	HjAXE	4	18829227	818744	-3000000	1		4	1022908	22097.7	-100000	1		4	12967.5	732.36	-4681	0.9999		4	18844.5	986.219	-20000	1		4	28862.2	3284.12	-6677	0.7276		4	1.86983e+06	232336	-600000	1
				HCH-Tremulacin (p.a.)						OH-tremuloidin (p.a.)						p-coumaric acid (p.a.)						Phenylalanine (p.a.)						Salicin (p.a.)
Line	Genotype ID	Promoter	Transgene	N	mean	s.e.	Abs(Dif)-LSD	p	contrast	N	mean	s.e.	Abs(Dif)-LSD	p	contrast	N	mean	s.e.	Abs(Dif)-LSD	p	contrast	N	mean	s.e.	Abs(Dif)-LSD	p	contrast	N	mean	s.e.	Abs(Dif)-LSD	p	contrast
10	17	35S	RWA-CD	4	751026	55024.7	-200000	0.9811		4	290484	27650.7	-100000	1		4	70856.2	4003.86	-20000	0.9901		4	73638	963.655	-5221	1		4	4.38652e+06	511813	-3000000	0.8196
21	18	35S	RWA-CD	4	807814	23608.7	-300000	1		4	326266	10856	-100000	0.9992		4	74339.2	3559.03	-30000	0.9999		4	75330.8	1801.33	-3529	0.9587		4	4880917	410782	-3000000	0.9555
4	20	35S	AnAXE1	4	1.15776e+06	126544	-20000	0.0805		4	424831	15669.9	-1279	0.0537	0.0248	4	98133.2	6976.84	-20000	0.7115	0.0003	4	75187.5	1495.64	-3672	0.9767		4	6.67589e+06	1.16969e+06	-5000000	1
8	21	35S	AnAXE1	4	779756	75158.2	-200000	0.9991		4	358371	26321.1	-70000	0.7798		4	94491	11702.5	-20000	0.9111		4	74223	1119.61	-4636	1		4	5.91283e+06	1.06192e+06	-4000000	1
17	22	35S	AnAXE1	4	766838	49033.4	-200000	0.9957		4	353913	31114.4	-70000	0.8453		4	159311	23397.1	44818	<.0001		4	70749.5	1443.46	-2908	0.7954		4	10287741	2.24248e+06	-2000000	0.3421
9	27	35S	HjAXE	5	911190	87114.2	-300000	1		5	427973	51574.1	8546	0.0297	0.0044	5	70252.4	3960.97	-20000	0.9749		5	73331.2	1165.91	-5207	1		5	6.90436e+06	1.18397e+06	-5000000	1
13	28	35S	HjAXE	4	625832	68575.3	-90000	0.3072		4	345894	52109.5	-80000	0.935		4	63684	3932.22	-20000	0.705		4	71752.8	1179.6	-3912	0.993		4	3.85905e+06	143037	-2000000	0.6002
22	29	35S	HjAXE	4	517150	83198.5	15497	0.035		4	432753	25751.4	6643	0.0342		4	75449.5	1309.78	-30000	1		4	73193.8	762.998	-5353	1		4	5530706	876374	-4000000	0.9991
WT	0	none	none	4	856067	36552.1	-300000	1		4	295890	10348.2	-100000	1		4	80959	7636.74	-30000	1		4	73350.2	828.699	-5509	1		4	6744223	1.65062e+06	-5000000	1
25	33	WP	GUS	4	847601	71097.9	-300000	1		4	308935	29832.6	-100000	1		4	89364	11065.8	-30000	0.9984		4	74224.8	1220.53	-4635	1		4	7106864	1.7968e+06	-5000000	1
27	34	WP	GUS	4	861491	92758.2	-300000	1		4	282827	7051.06	-100000	1		4	76932.8	3177.12	-30000	1		4	72975.2	354.113	-5134	1		4	5.11662e+06	1.11442e+06	-4000000	0.9845
1	23	WP	AnAXE1	4	973558	115401	-200000	0.9555		4	343292	35658.7	-80000	0.9549		4	75626.8	5462.62	-30000	1		4	75912	1642.46	-2947	0.8092		4	5.90367e+06	1.3904e+06	-4000000	1
5	24	WP	AnAXE1	4	771543	56458.3	-200000	0.9975		4	282712	14403.9	-100000	1		4	82318.8	2637.71	-30000	1		4	75017	906.073	-3842	0.9897		4	3.51073e+06	119809	-2000000	0.4551
8	25	WP	AnAXE1	3	869477	100382	-300000	1		3	317331	36833.4	-100000	1		3	66883.3	4881.91	-20000	0.9297		3	74013.7	1965.95	-5287	1		3	5759091	1.20294e+06	-5000000	1
10	26	WP	AnAXE1	4	793988	48172.1	-300000	0.9999		4	309372	21821.8	-100000	1		4	77065.8	2602.16	-30000	1		4	75213.2	1224.28	-3646	0.9739		4	7194132	1.7363e+06	-5000000	1
14B	31	WP	HjAXE	4	739224	34917.8	-200000	0.9572		4	282355	15353.7	-100000	1		4	80378.2	4950.47	-30000	1		4	73467.5	1198.16	-5392	1		4	4621610	713474	-3000000	0.8968
14C	32	WP	HjAXE	4	807124	98095.2	-300000	1		4	289049	44252.1	-100000	1		4	81997.2	4074.27	-30000	1		4	72845.5	2193.95	-5004	1		4	7330384	1.04701e+06	-5000000	1
				Salicortin (p.a.)						Salicoyl-tremuloidin (p.a.)							Salicylic acid (p.a.)					Tremulacin (p.a.)						Tremuloidin (p.a.)
Line	Genotype ID	Promoter	Transgene	N	mean	s.e.	Abs(Dif)-LSD	p	contrast	N	mean	s.e.	Abs(Dif)-LSD	p	contrast	N	mean	s.e.	Abs(Dif)-LSD	p	contrast	N	mean	s.e.	Abs(Dif)-LSD	p	contrast	N	mean	s.e.	Abs(Dif)-LSD	p	contrast
10	17	35S	RWA-CD	4	30879527	2.11074e+06	-4000000	0.7348	0.0441	4	2837.5	772.943	-2951	1		4	1.17376e+06	46521.6	-100000	1		4	35370372	2.48623e+06	-10000000	1		4	1.28659e+06	145386	-2000000	0.8451
21	18	35S	RWA-CD	4	32537079	892425	-2000000	0.3143		4	3947.75	588.195	-1841	0.8885		4	1.23027e+06	12076.1	-90000	0.9538		4	39103848	1.80945e+06	-6000000	0.9471		4	1.54902e+06	158150	-2000000	0.9395
4	20	35S	AnAXE1	4	30364714	928467	-5000000	0.8596		4	3484.25	396.393	-2304	0.996		4	1.19599e+06	33989.9	-100000	1		4	40938149	1.64168e+06	-4000000	0.6064		4	2.6366e+06	861377	-4000000	1
8	21	35S	AnAXE1	4	31491292	998094	-3000000	0.5671		4	3747.25	467.689	-2041	0.9614		4	1.15103e+06	19199.1	-100000	0.9998		4	40920287	458100	-4000000	0.6104		4	2.27075e+06	566739	-3000000	0.9999
17	22	35S	AnAXE1	4	21677056	3.32751e+06	-3000000	0.4307		4	3323.75	878.44	-2465	0.9996		4	1118880	24274.7	-80000	0.861		4	35570129	2.75572e+06	-10000000	1		4	7026540	2.82059e+06	-20000	0.0519
9	27	35S	HjAXE	5	30036139	3.29887e+06	-4000000	0.8906		5	2376.4	943.314	-2766	1		5	1.13936e+06	30159.2	-90000	0.989	0.0126	5	40509797	3.54225e+06	-4000000	0.6416		5	2.98597e+06	702266	-4000000	1
13	28	35S	HjAXE	4	27241408	763970	-8000000	1		4	1156	117.773	-1709	0.8167		4	1057349	35507.9	-20000	0.1151		4	31508932	1.14911e+06	-6000000	0.9118		4	1.08712e+06	52501.5	-2000000	0.7467
22	29	35S	HjAXE	4	24262976	1.28567e+06	-5000000	0.9828		4	484.5	27.2075	-1037	0.3736		4	1.04689e+06	13294.5	-6307	0.0692		4	29276388	2.7994e+06	-4000000	0.454		4	1695964	464081	-3000000	0.9709
WT	0	none	none	4	26846382	1.86338e+06	-8000000	1		4	2618	356.688	-3171	1		4	1.17953e+06	18682.7	-100000	1		4	35456250	2.69388e+06	-10000000	1		4	3.06262e+06	1.09323e+06	-4000000	1
25	33	WP	GUS	4	26789272	1.86055e+06	-8000000	1		4	4032.25	682.648	-1756	0.8445		4	1216103	54021.4	-100000	0.9973		4	35933664	1.90495e+06	-9000000	1		4	3.36538e+06	1.33631e+06	-4000000	1
27	34	WP	GUS	4	29079595	511659	-6000000	0.9954		4	3098.75	203.293	-2690	1		4	1.21374e+06	48681.2	-100000	0.9986		4	39288576	1.16887e+06	-6000000	0.9266		4	2142464	548279	-3000000	0.9993
1	23	WP	AnAXE1	4	31066775	2.61036e+06	-4000000	0.6841		4	3983.5	920.766	-1805	0.8707		4	1.1799e+06	43420.9	-100000	1		4	41145071	3.50151e+06	-4000000	0.5598		4	2.36986e+06	621900	-3000000	1
5	24	WP	AnAXE1	4	28702592	822440	-6000000	0.9993		4	2259	450.934	-2812	1		4	1142891	12019.4	-100000	0.9972		4	34722829	1.649e+06	-9000000	1		4	1.13155e+06	62100	-2000000	0.77
8	25	WP	AnAXE1	3	30906895	1.45782e+06	-5000000	0.8047		3	3664.33	1348.44	-2378	0.9888		3	1173812	22958	-100000	1		3	39663010	2.45745e+06	-6000000	0.9188		3	2.12943e+06	440191	-3000000	0.9997
10	26	WP	AnAXE1	4	29746237	1.55158e+06	-5000000	0.9579		4	4147.25	1176.41	-1641	0.7748		4	1201020	36610.7	-100000	1		4	41200815	1.52411e+06	-4000000	0.5474		4	3366577	1016156	-4000000	1
14B	31	WP	HjAXE	4	31337086	907875	-4000000	0.6095		4	3927.75	1023.76	-1861	0.8978		4	1.16843e+06	20543.5	-100000	1		4	39331016	1.76393e+06	-6000000	0.9213		4	1.57016e+06	138778	-2000000	0.945
14C	32	WP	HjAXE	4	29865682	2.30943e+06	-5000000	0.9442		4	4110	1073.31	-1679	0.7984		4	1.15309e+06	41067.6	-100000	0.9999		4	40796852	2.74002e+06	-4000000	0.6385		4	2.99722e+06	707059	-4000000	1

## Sheet: Tab S3 Construct effects 1
Material behind table and graphs: "Modification of cell wall acetylation affects field performance, phenolic composition of foliage and resistance to biotic stress factors in aspen in a construct-dependent fashion"
By: M. Derba-Maceluch, F. Amini, E.N. Donev, P. M.-A. Pawar, L. Michaud, U. Johansson, B.R. Albrectsen, E. J. Mellerowicz
Table S3. Overview of construct effects on continuous data related to growth traits, summary of ANOVA nested models
For growth and leaf trait data, ANOVA nested model including the effect of construct, line nested within construct, and block (random) for data with dwarf lines excluded. Construct Means and s.e. in column AB to AH; Tukey tests letters provided when there were significant construct effects. P values are marked by red font when a significant (p≤0.05) difference from WT is observed. Downregulation …
Model							Fixed effects							Random effects											Construct Means and s.e.
Y	R2	R2Adj	Root Mean Square Error	Mean of Response	N	N		Source	Nparm	DF	DFDen	F Ratio	Prob > F	N		Random Effect	Var Ratio	Var Component	Std Error	95% Lower	95% Upper	Wald p-Value	Pct of Total	N			35S:RWA-C RNAi	35S:AnAXE1	35S:HjAXE	T89	WP:GUS	WP:AnAXE1	WP:HjAXE	N
Height-2014 (cm)	0.224973	0.199353	17.8831	82.8822	501			Construct	6	6	471.1	2.5514	0.0193			Block	0.211564	67.6591	30.0298	8.80169	126.516	0.0243	17.462			mean	82.4687	81.0952	82.9881	77.8393	80.8036	84.5089	89.7679
								line[Construct]	10	10	471	1.1477	0.3246			Residual		319.804	20.8392	282.59	364.927		82.538			s.e.	3.30169	2.93939	2.93939	3.24709	3.24709	2.77276	3.24709
																Total		387.463	36.2225	325.227	469.548		100			Tukey	AB	AB	AB	B	AB	AB	A
Height-2015 (cm)	0.117912	0.088631	22.5868	106.908	499			Construct	6	6	469.2	1.8975	0.0796			Block	0.0675511	34.4621	19.1283	-3.02874	71.9528	0.0716	6.328			mean	107.382	102.52	107.595	102.518	104.732	109.781	112.732
								line[Construct]	10	10	469.2	1.1233	0.3425			Residual		510.163	33.3134	450.684	582.311		93.672			s.e.	3.48409	2.93455	2.92146	3.40171	3.40171	2.65701	3.40171
																Total		544.625	37.6034	477.833	626.549		100			Tukey
Height-2016 (cm)	0.106205	0.076474	40.8949	161.482	498			Construct	6	6	468.1	1.7935	0.0986			Block	0.0585119	97.8551	56.9733	-13.8106	209.521	0.0859	5.528			mean	161.078	157.183	152.821	165.219	161.589	163.406	174.143
								line[Construct]	10	10	468.1	0.957	0.4805			Residual		1672.4	109.331	1477.21	1909.21		94.472			s.e.	6.22186	5.21059	5.18644	6.11624	6.07074	4.69713	6.07074
																Total		1770.25	120.511	1555.91	2032.4		100			Tukey
Height-2017 (cm)	0.173601	0.145997	61.9639	275.865	496			Construct	6	6	466.1	6.1416	<.0001			Block	0.093327	358.332	183.48	-1.28309	717.947	0.0508	8.536			mean	277.147	259.224	248.75	296.949	285.679	283.94	294.821
								line[Construct]	10	10	466.1	0.9344	0.501			Residual		3839.53	251.544	3390.55	4384.49		91.464			s.e.	9.9215	8.47833	8.44416	9.83988	9.70351	7.77982	9.70351
																Total		4197.86	305.493	3658.01	4867.38		100			Tukey	ABC	BC	C	A	AB	AB	A
Height-final 2018 (cm)	0.174074	0.146428	62.1828	283.285	495			Construct	6	6	465.1	5.9639	<.0001			Block	0.0941899	364.204	186.269	-0.877236	729.286	0.0506	8.608			mean	290.757	266.808	255.726	304.951	292.125	291.371	298.107
								line[Construct]	10	10	465.1	1.0275	0.4188			Residual		3866.7	253.599	3414.1	4416.18		91.392			s.e.	10.0508	8.52229	8.48804	9.88686	9.75002	7.82256	9.75002
																Total		4230.91	308.73	3685.48	4907.74		100			Tukey	AB	BC	C	A	AB	AB	AB
Diameter-2014 (mm)	0.251894	0.227163	0.694308	5.14571	501			Construct	6	6	471.1	2.565	0.0187			Block	0.244212	0.117726	0.0514382	0.0169091	0.218543	0.0221	19.628			mean	5.18801	5.03571	5.08333	5	5.125	5.19643	5.42857
								line[Construct]	10	10	471	1.7769	0.0623			Residual		0.482064	0.0314125	0.425969	0.550081		80.372			s.e.	0.132501	0.118945	0.118945	0.13045	0.13045	0.112753	0.13045
																Total		0.59979	0.0598173	0.49787	0.736738		100			Tukey	AB	B	AB	B	AB	AB	A
Diameter-2015 (mm)	0.131683	0.10286	2.1429	9.00601	499			Construct	6	6	469.1	1.4444	0.1959			Block	0.0873686	0.401197	0.208068	-0.006608	0.809003	0.0538	8.035			mean	8.97287	8.69685	9	8.82143	8.625	9.30638	9.46429
								line[Construct]	10	10	469.1	1.2854	0.2357			Residual		4.59201	0.299867	4.05662	5.24144		91.965			s.e.	0.340252	0.289852	0.288658	0.332652	0.332652	0.264661	0.332652
																Total		4.9932	0.358009	4.35961	5.77648		100			Tukey
Diameter-2016 (mm)	0.123066	0.093895	5.38063	17.8735	498			Construct	6	6	468.1	1.6447	0.133			Block	0.0812227	2.35149	1.24379	-0.086288	4.78928	0.0587	7.512			mean	18.1842	17.34	16.8214	18.3293	17.3214	18.2438	19.3393
								line[Construct]	10	10	468.1	0.9292	0.5058			Residual		28.9512	1.89263	25.5724	33.0506		92.488			s.e.	0.846864	0.719009	0.715975	0.833404	0.827617	0.654909	0.827617
																Total		31.3027	2.21957	27.3703	36.1527		100			Tukey
Diameter-2017 (mm)	0.231674	0.206009	7.71865	31.2863	496			Construct	6	6	466.1	6.0405	<.0001			Block	0.18003	10.7257	4.86716	1.18628	20.2652	0.0275	15.256			mean	31.9654	29.7152	27.5833	33.3758	31.4107	32.6257	33.7679
								line[Construct]	10	10	466.1	1.1097	0.3528			Residual		59.5775	3.90301	52.611	68.0332		84.744			s.e.	1.37717	1.21835	1.21465	1.36804	1.35278	1.14375	1.35278
																Total		70.3032	6.16976	59.6204	84.155		100			Tukey	AB	BC	C	AB	ABC	AB	A
Diameter-final 2018 (mm)	0.231145	0.20541	7.69311	31.3172	495			Construct	6	6	465.1	6.0482	<.0001			Block	0.178751	10.5792	4.80561	1.16036	19.998	0.0277	15.164			mean	32.64	29.7678	27.5833	33.4278	31.3214	32.6293	33.4643
								line[Construct]	10	10	465.1	1.0953	0.3638			Residual		59.184	3.88137	52.2568	67.5938		84.836			s.e.	1.37982	1.21209	1.2084	1.36155	1.3463	1.13759	1.3463
																Total		69.7632	6.10844	59.1837	83.4728		100			Tukey	A	AB	B	A	AB	A	A
Volume-2014 (cm3)	0.295329	0.272178	2.33263	6.08096	504			Construct	6	6	474	3.7782	0.0011			Block	0.309385	1.68342	0.71964	0.272947	3.09388	0.0193	23.628			mean	5.76125	5.74854	6.01453	5.42842	6.10394	6.25446	7.28158
								line[Construct]	10	10	474	1.9713	0.0346			Residual		5.44116	0.353441	4.80982	6.20621		76.372			s.e.	0.46627	0.430139	0.430139	0.46627	0.46627	0.410884	0.46627
																Total		7.12458	0.79741	5.78773	8.98742		100			Tukey	B	B	B	B	AB	AB	A
Volume-2015 (cm3)	0.132968	0.104483	16.5235	25.8146	504			Construct	6	6	474	1.8666	0.0849			Block	0.0841216	22.9673	11.9933	-0.53921	46.4738	0.0555	7.759			mean	24.2865	22.9406	25.8779	24.0396	23.7861	28.3881	30.2149
								line[Construct]	10	10	474	1.2846	0.2361			Residual		273.025	17.7349	241.346	311.413		92.241			s.e.	2.55264	2.21152	2.21152	2.55264	2.55264	2.01947	2.55264
																Total		295.992	20.9974	258.793	341.876		100			Tukey
Volume- 2016 (cm3)	0.127454	0.098788	125.65	164.91	504			Construct	6	6	474	1.5822	0.1504			Block	0.0861857	1360.68	706.292	-23.62406	2744.99	0.054	7.935			mean	156.021	155.294	141.104	176.36	160.533	172.575	201.527
								line[Construct]	10	10	474	1.0041	0.4387			Residual		15787.8	1025.53	13955.9	18007.6		92.065			s.e.	19.4709	16.8861	16.8861	19.4709	19.4709	15.4322	19.4709
																Total		17148.5	1221.53	14985.3	19819		100			Tukey
Volume-2017 (cm3)	0.220517	0.194907	512.275	822.686	504			Construct	6	6	474	5.6341	<.0001			Block	0.162744	42708.2	19616.5	4260.62	81155.8	0.0295	13.997			mean	832.618	710.485	592.112	940.033	880.268	899.659	998.043
								line[Construct]	10	10	474	1.3558	0.1981			Residual		262426	17046.4	231976	299324		86.003			s.e.	87.9589	78.5793	78.5793	87.9589	87.9589	73.4416	87.9589
																Total		305134	25675.7	260459	362443		100			Tukey	ABC	BC	C	AB	AB	AB	A
Volume-final 2018 (cm3)	0.216871	0.191142	523.211	842.057	504			Construct	6	6	474	5.5152	<.0001			Block	0.158011	43255.4	19954.9	4144.56	82366.2	0.0302	13.645			mean	851.592	731.758	607.74	967.418	892.063	920.838	1016.52
								line[Construct]	10	10	474	1.3706	0.1908			Residual		273750	17782	241986	312240		86.355			s.e.	89.32	79.6781	79.6781	89.32	89.32	74.39	89.32
																Total		317005	26397.5	271020	375842		100			Tukey	ABC	BC	C	AB	AB	AB	A
Apical Dominance 2017	0.118803	0.059061	2.01775	6.75099	253			Construct	6	6	230.2	1.794	0.1012			Block	0.0195364	0.0795386	0.121693	-0.158976	0.318053	0.5134	1.916			mean	6.89209	7.17816	6.20737	6.48783	7.47812	6.44372	6.92171
								line[Construct]	10	10	230.7	1.3135	0.224			Residual		4.0713	0.384769	3.41111	4.9447		98.084			s.e.	0.390912	0.321919	0.320374	0.3898	0.385057	0.285427	0.391244
																Total		4.15084	0.383663	3.49071	5.01878		100			Tukey
Branching 2017	0.124295	0.064926	4.00781	28.9921	253			Construct	6	6	228.1	0.4635	0.8349			Block	0.0655938	1.0536	0.770771	-0.457081	2.56428	0.1716	6.156			mean	29.4421	28.5815	29.5317	28.2519	28.8431	29.2339	28.8415
								line[Construct]	10	10	228.7	0.9568	0.4821			Residual		16.0625	1.51864	13.4569	19.5099		93.844			s.e.	0.811673	0.680534	0.680049	0.808683	0.800734	0.614326	0.813203
																Total		17.1161	1.6303	14.3216	20.8213		100			Tukey
weight of 1 leaf (g)	0.19229	0.137062	0.011531	0.081796	251			Construct	6	6	225	4.8648	0.0001			Block	0.0248611	3.3058e-06	5.1299e-06	-6.749e-06	1.336e-05	0.5193	2.426			mean	0.0870216	0.0817185	0.0741775	0.0853185	0.0816176	0.0828302	0.084606
								line[Construct]	10	10	226.2	1.5414	0.1259			Residual		0.000133	1.2767e-05	0.0001111	0.000162		97.574			s.e.	0.00224887	0.001877	0.00181179	0.00228163	0.00224879	0.00166568	0.00225143
																Total		0.0001363	1.27e-05	0.0001144	0.0001651		100			Tukey	A	A	B	A	AB	A	A
Chewing 2017 (damage%)	0.30555	0.281757	6.07274	7.55165	484			Construct	6	6	455	23.2241	<.0001			Block	0.0228039	0.840965	0.743698	-0.616656	2.29859	0.2581	2.23			mean	6.29342	14.5903	7.32703	5.08039	5.37507	5.66234	6.7763
								line[Construct]	10	10	454.9	4.89	<.0001			Residual		36.8781	2.44687	32.5157	42.1862		97.77			s.e.	0.889847	0.714219	0.714216	0.862483	0.869879	0.636781	0.854998
																Total		37.7191	2.49147	33.2754	43.1214		100			Tukey	B	A	B	B	B	B	B
Chlorophyll 2017	0.515489	0.482501	0.914322	11.0623	252			Construct	6	6	224.4	23.6341	<.0001			Block	0.128428	0.107364	0.0651626	-0.020353	0.23508	0.0994	11.381			mean	12.0973	10.9793	9.74	11.3913	10.954	11.476	11.4769
								line[Construct]	10	10	225	5.2294	<.0001			Residual		0.835985	0.0795591	0.699598	1.01677		88.619			s.e.	0.195316	0.167056	0.167317	0.194543	0.192974	0.154497	0.195811
																Total		0.943349	0.097911	0.777423	1.16901		100			Tukey	A	B	C	AB	B	AB	AB
Condensed tannins (mg/g DW)	0.401078	0.360126	20.6628	112.854	251			Construct	6	6	222.6	11.7438	<.0001			Block	0.269969	115.264	56.6344	4.26216	226.265	0.0418	21.258			mean	103.238	134.149	101.528	110.784	106.69	117.873	106.952
								line[Construct]	10	10	223	1.0121	0.434			Residual		426.951	40.659	357.256	519.353		78.742			s.e.	4.88218	4.31115	4.32128	4.92709	4.88238	4.0456	4.89541
																Total		542.215	67.9464	430.286	704.554		100			Tukey	C	A	C	BC	BC	B	BC

## Sheet: Tab S4 Construct effects 2
Material behind table and graphs: "Modification of cell wall acetylation affects field performance, phenolic composition of foliage and resistance to biotic stress factors in aspen in a construct-dependent fashion"
By: M. Derba-Maceluch, F. Amini, E.N. Donev, P. M.-A. Pawar, L. Michaud, U. Johansson, B.R. Albrectsen, E. J. Mellerowicz
Table S4. Overview of construct effects on metabolomics data, summary of ANOVA nested models
For chemical compounds data ANOVA Nested model: construct, line nested with construct; data with dwarf lines excluded. Construct Means and s.e. in column Y to AE; Tukey tests letters provided when construct effects were significant and are marked by red font when a significant (p≤0.05) difference from WT is observed. Downregulation is shown in red shading, upregulation in green shading.
Model								Fixed effect					Test effect										Means and s.e.
Y	RSquare	RSquare Adj	Root Mean Square Error	Mean of Response	Observations (or Sum Wgts)	N		Source	DF	Sum of Squares	Mean Square	F Ratio	N		Source	Nparm	DF	Sum of Squares	F Ratio	Prob > F	N			35S:RWA-C RNAi	35S:AnAXE1	35S:HjAXE	T89	WP:GUS	WP:AnAXE1	WP:HjAXE	N
Acetyl-salicin (p.a.)	0.278071	0.037428	379.556	737.908	65			Model	16	2.66351e+06	166469	1.1555			Construct	6	6	1.19086e+06	1.3777	0.2428			mean	664	872.545	546	594	639.125	809.733	926.625
								Error	48	6.91501e+06	144063	Prob > F			line[Construct]	10	10	1.49209e+06	1.0357	0.429			s.e.	134.193	115.495	117.782	189.778	134.193	98.7636	134.193
								C. Total	64	9.57852e+06		0.336											Tukey
Acetyl-salicortin (p.a.)	0.39082	0.199705	77236.6	402993	68			Model	16	195190000000	12200000000	2.0449			Construct	6	6	115810000000	3.2355	0.009			mean	458047	403962	332471	387394	419924	408180	442228
								Error	51	304240000000	5965500000	Prob > F			line[Construct]	10	10	90289000000	1.5135	0.1618			s.e.	27307.3	22296.3	21540.3	38618.3	27307.3	20097.6	27307.3
								C. Total	67	499430000000		0.0274											Tukey	A	AB	B	AB	AB	AB	A
Acetyl-tremulacin (p.a.)	0.68488	0.586018	2698.43	4196.34	68			Model	16	807108242	50444265	6.9277			Construct	6	6	674001730	15.4272	<.0001			mean	2182	10906.9	2293.1	3158.3	2860.6	3205.6	2950
								Error	51	371359073	7.28155e+06	Prob > F			line[Construct]	10	10	141440319	1.9424	0.0604			s.e.	954.041	778.971	752.558	1349.22	954.041	702.155	954.041
								C. Total	67	1178467315		<.0001											Tukey	B	A	B	B	B	B	B
Arachidonic acid (p.a.)	0.363703	0.164081	711.574	6215.38	68			Model	16	14760403	922525	1.822			Construct	6	6	9.16979e+06	3.0183	0.0133			mean	5686.88	6418	5929.31	7235.25	6013.25	6476	6108.38
								Error	51	25823231	506338	Prob > F			line[Construct]	10	10	5.37148e+06	1.0608	0.4088			s.e.	251.579	205.414	198.449	355.787	251.579	185.157	251.579
								C. Total	67	40583634		0.0537											Tukey	B	AB	B	A	AB	AB	AB
Benzoic acid (p.a.)	0.335237	0.126684	1931.98	8248.25	68			Model	16	95998007	5999875	1.6074			Construct	6	6	57638946	2.5737	0.0296			mean	9396.63	9339.5	6842.38	8802.5	7744.63	8337.07	7807.5
								Error	51	190360716	3732563	Prob > F			line[Construct]	10	10	40533732	1.0859	0.3903			s.e.	683.06	557.716	538.805	965.992	683.06	502.718	683.06
								C. Total	67	286358723		0.1007											Tukey	AB	A	B	AB	AB	AB	AB
Caffeic acid (p.a.)	0.227059	-0.01543	61290.7	593219	68			Model	16	56280000000	3517500000	0.9364			Construct	6	6	43677000000	1.9378	0.0924			mean	615547	600569	632435	573803	578404	563207	576938
								Error	51	191580000000	3756600000	Prob > F			line[Construct]	10	10	12756000000	0.3396	0.9658			s.e.	21669.5	17693.1	17093.2	30645.4	21669.5	15948.4	21669.5
								C. Total	67	247860000000		0.5355											Tukey
Catechin (p.a.)	0.393288	0.202948	1434453	19255284	68			Model	16	68025000000000	4252000000000	2.0662			Construct	6	6	39849000000000	3.2277	0.0092			mean	18107820	20517646	19323366	18648679	18937764	19594648	18383082
								Error	51	104940000000000	2058000000000	Prob > F			line[Construct]	10	10	28217000000000	1.3713	0.2203			s.e.	507156	414091	400050	717226	507156	373256	507156
								C. Total	67	172970000000000		0.0257											Tukey	B	A	AB	AB	AB	AB	B
Cholic acid (p.a)	0.085792	-0.20102	65190.3	1013553	68			Model	16	20339000000	1271200000	0.2991			Construct	6	6	5023582091	0.197	0.9762			mean	1001269	1025236	1015112	1007541	1021987	1013338	1000756
								Error	51	216740000000	4249800000	Prob > F			line[Construct]	10	10	15438000000	0.3633	0.9568			s.e.	23048.3	18818.8	18180.7	32595.2	23048.3	16963.1	23048.3
								C. Total	67	237080000000		0.9948											Tukey
Cinnamoyl-salicin (p.a.)	0.409296	0.223976	2792.51	12437	68			Model	16	275567283	17222955	2.2086			Construct	6	6	139401091	2.9794	0.0143			mean	12097	11944.3	10357.6	11807.5	13965.6	12986.9	14649.9
								Error	51	397704905	7.79814e+06	Prob > F			line[Construct]	10	10	151530465	1.9432	0.0603			s.e.	987.303	806.129	778.795	1396.26	987.303	726.635	987.303
								C. Total	67	673272189		0.0166											Tukey	AB	AB	B	AB	A	AB	A
Cinnamoyl-salicortin (p.a.)	0.301295	0.082093	8600.46	21112.4	68			Model	16	1626711949	101669497	1.3745			Construct	6	6	660736648	1.4888	0.2008			mean	20480.5	24055.7	16534.8	18967.5	19348.1	22516.9	24971.1
								Error	51	3772363133	73967905	Prob > F			line[Construct]	10	10	1055140107	1.4265	0.1957			s.e.	3040.72	2482.74	2398.55	4300.23	3040.72	2237.91	3040.72
								C. Total	67	5399075082		0.1922											Tukey
HCH-Ac-salicortin (p.a.)	0.526943	0.378533	6445.84	23133.3	68			Model	16	2360364408	147522775	3.5506			Construct	6	6	1324918063	5.3147	0.0003			mean	30552.1	15154.3	22384.9	22058	25911.9	23953.5	25120.3
								Error	51	2118991338	41548850	Prob > F			line[Construct]	10	10	1040742124	2.5049	0.0157			s.e.	2278.95	1860.75	1797.66	3222.92	2278.95	1677.26	2278.95
								C. Total	67	4479355746		0.0003											Tukey	A	B	AB	AB	A	A	A
HCH-salicortin (p.a.)	0.541707	0.397928	333025	1821937	68			Model	16	6685700000000	417900000000	3.7677			Construct	6	6	1562900000000	2.3487	0.0444			mean	2027209	1941761	1590870	1819946	1814078	1891767	1690340
								Error	51	5656200000000	110900000000	Prob > F			line[Construct]	10	10	5270000000000	4.7518	<.0001			s.e.	117742	96136.1	92876.3	166513	117742	86655.9	117742
								C. Total	67	12342000000000		0.0002											Tukey	A	A	A	A	A	A	A
HCH-Tremulacin (p.a.)	0.497352	0.339659	154634	814580	68			Model	16	1206700000000	75420000000	3.1539			Construct	6	6	370880000000	2.5851	0.029			mean	779420	901451	702145	856067	854546	850986	773174
								Error	51	1219500000000	23910000000	Prob > F			line[Construct]	10	10	888600000000	3.7162	0.0009			s.e.	54671.5	44639.1	43125.4	77317.1	54671.5	40237.1	54671.5
								C. Total	67	2426200000000		0.0009											Tukey	AB	A	B	AB	AB	AB	AB
OH-tremuloidin (p.a.)	0.476666	0.312483	62261.1	335289	68			Model	16	180070000000	11250000000	2.9033			Construct	6	6	131850000000	5.669	0.0001			mean	308376	379038	404189	295890	295881	312900	285702
								Error	51	197700000000	3876400000	Prob > F			line[Construct]	10	10	43769000000	1.1291	0.3597			s.e.	22012.6	17973.2	17363.8	31130.5	22012.6	16200.8	22012.6
								C. Total	67	377770000000		0.002											Tukey	BC	AB	A	ABC	BC	BC	C
p-coumaric acid (p.a.)	0.693346	0.597141	16033.3	83463.8	68			Model	16	29643000000	1852700000	7.207			Construct	6	6	18105000000	11.738	<.0001			mean	72598	117312	69830	80959	83148	76046	81188
								Error	51	13110000000	257066102	Prob > F			line[Construct]	10	10	11641000000	4.5284	0.0001			s.e.	5668.62	4628.41	4471.47	8016.64	5668.62	4171.99	5668.62
								C. Total	67	42753000000		<.0001											Tukey	B	A	B	B	B	B	B
Phenylalanine (p.a.)	0.244722	0.007772	2634.05	73779.7	68			Model	16	114652949	7165809	1.0328			Construct	6	6	46694076	1.1217	0.3631			mean	74484.4	73386.7	72803.2	73350.3	73600	75107.3	73156.5
								Error	51	353849373	6938223	Prob > F			line[Construct]	10	10	65889088	0.9497	0.4974			s.e.	931.278	760.385	734.602	1317.03	931.278	685.402	931.278
								C. Total	67	468502322		0.4403											Tukey
Salicin (p.a.)	0.3562	0.154223	2452666	6000685	68			Model	16	169740000000000	10610000000000	1.7636			Construct	6	6	55560000000000	1.5393	0.1844			mean	4633719	7625487	5544678	6744223	6111740	5580760	5975997
								Error	51	306790000000000	6016000000000	Prob > F			line[Construct]	10	10	115450000000000	1.9192	0.0638			s.e.	867148	708024	684016	1.22633e+06	867148	638204	867148
								C. Total	67	476540000000000		0.0639											Tukey
Salicortin (p.a.)	0.404264	0.217367	3846163	28977236	68			Model	16	511960000000000	32000000000000	2.163			Construct	6	6	183300000000000	2.0652	0.0737			mean	31708303	27844354	27399864	26846382	27934434	30052206	30601384
								Error	51	754440000000000	14790000000000	Prob > F			line[Construct]	10	10	339250000000000	2.2933	0.0261			s.e.	1359824	1.11029e+06	1.07264e+06	1.92308e+06	1359824	1.0008e+06	1359824
								C. Total	67	1266400000000000		0.0191											Tukey
Salicoyl-tremuloidin (p.a.)	0.384524	0.191433	1515.99	3110.37	68			Model	16	73228007	4576750	1.9914			Construct	6	6	54601960	3.9597	0.0025			mean	3392.63	3518.42	1418.77	2618	3565.5	3503.47	4018.88
								Error	51	117210147	2298238	Prob > F			line[Construct]	10	10	21845183	0.9505	0.4967			s.e.	535.985	437.63	422.791	757.997	535.985	394.474	535.985
								C. Total	67	190438154		0.0323											Tukey	AB	A	B	AB	A	A	A
Salicylic acid (p.a.)	0.422086	0.24078	66432.3	1160790	68			Model	16	164390000000	10270000000	2.328			Construct	6	6	122950000000	4.6433	0.0008			mean	1202017	1155301	1085672	1179529	1214922	1174446	1160759
								Error	51	225080000000	4413300000	Prob > F			line[Construct]	10	10	49430000000	1.12	0.366			s.e.	23487.4	19177.4	18527.1	33216.2	23487.4	17286.2	23487.4
								C. Total	67	389460000000		0.0115											Tukey	A	AB	B	AB	A	A	AB
Tremulacin (p.a.)	0.429751	0.250849	4683326	37702805	68			Model	16	843010000000000	52690000000000	2.4022			Construct	6	6	322650000000000	2.4518	0.0369			mean	37237110	39142855	34283867	35456250	37611120	39150926	40063934
								Error	51	1118600000000000	21930000000000	Prob > F			line[Construct]	10	10	568120000000000	2.5902	0.0127			s.e.	1.65581e+06	1.35196e+06	1.30612e+06	2.34166e+06	1.65581e+06	1218640	1.65581e+06
Tremuloidin (p.a.)	0.400493	0.212412	1905156	2522821	68			Model	16	123660000000000	7729000000000	2.1294			Construct	6	6	42942000000000	1.9718	0.087			mean	1417806	3977965	2004784	3062617	2753920	2257348	2283690
								Error	51	185110000000000	3630000000000	Prob > F			line[Construct]	10	10	81887000000000	2.2561	0.0286			s.e.	673575	549971	531323	952578	673575	495737	673575
								C. Total	67	308770000000000		0.0212											Tukey

## Sheet: Tab S5 Construct effects 3
Material behind table and graphs: "Modification of cell wall acetylation affects field performance, phenolic composition of foliage and resistance to biotic stress factors in aspen in a construct-dependent fashion"
By: M. Derba-Maceluch, F. Amini, E.N. Donev, P. M.-A. Pawar, L. Michaud, U. Johansson, B.R. Albrectsen, E. J. Mellerowicz
Table S5. Overview of construct effects on discrete data related to biotic stress, summary of Persson ChiSq test.
Counts are provided and evaluated across all except the dwarf lines, and the Persson χ2 and Likelihood Ratio provided for the overall ratio (JMP: fit y by x, analysis of means of proportions (significance). Significant values ( p≤0.05) are in red font. Downregulation of the occurrence of a trait compared to overall distribution is shown in red shading, upregulation in green shading.
	Tests					Test							Contingency Table
Y		N	DF	-LogLike	RSquare (U)	N			ChiSquare	Prob>ChiSq	N			35S:RWA-CD	35S:AnAXE1	35S:HjAXE	WT	WP:GUS	WP:AnAXE1	WP:HjAXE	N
Injury (0/1)		504	6	4.94753	0.0169			Likelihood Ratio	9.895	0.1291			N(no)	37	70	65	36	39	83	39
								Pearson	9.637	0.1408			N(yes)	19	14	19	20	17	29	17
													N (total)	56	84	84	56	56	112	56
													P<0.05
Multiple injury (0/1)		504	6	3.98473	0.0301			Likelihood Ratio	7.969	0.2403			N(no)	54	81	78	50	48	105	51
								Pearson	8.24	0.221			N(yes)	2	3	6	6	8	7	5
													N (total)	56	84	84	56	56	112	56
													P<0.05
Hare (0/1)		504	6	3.8544	0.012			Likelihood Ratio	11.176	0.0831			N(no)	40	60	55	34	34	68	43
								Pearson	11.529	0.0733			N(yes)	16	24	29	22	22	44	13
													N (total)	56	84	84	56	56	112	56
													P<0.05
Multiple Hare (0/1)		504	6	3.51945	0.0261			Likelihood Ratio	7.039	0.3173			N(no)	54	81	78	50	49	104	50
								Pearson	6.802	0.3395			N(yes)	2	3	6	6	7	8	6
													N (total)	56	84	84	56	56	112	56
													P<0.05
Survival Rate (0/1)		504	6	5.58799	0.1138			Likelihood Ratio	11.176	0.0831			N(no)	4	1	0	2	0	2	1
								Pearson	11.529	0.0733			N(yes)	52	83	84	54	56	110	55
													N (total)	56	84	84	56	56	112	56
													P<0.05
Chlorosis (0/1)		480	6	6.2076	0.0695			Likelihood Ratio	12.415	0.0533			N(no)	48	75	73	54	52	103	53
								Pearson	11.038	0.0872			N(yes)	2	6	8	0	1	3	2
													N (total)	50	81	81	54	53	106	55
													P<0.05
Necrosis (0/1)		480	6	56.674	0.4116			Likelihood Ratio	113.348	<.0001			N(no)	50	77	47	53	53	106	54
								Pearson	146.258	<.0001			N(yes)	0	4	34	1	0	0	1
													N (total)	50	81	81	54	53	106	55
													P<0.05			*
HR (0/1)		481	6	6.73744	0.0311			Likelihood Ratio	13.475	0.0361			N(no)	39	71	74	47	47	83	40
								Pearson	13.436	0.0366			N(yes)	11	11	7	7	6	23	15
													N (total)	50	82	81	54	53	106	55
													P<0.05
Gall organisms (0/1)		481	6	1.86975	0.0099			Likelihood Ratio	3.74	0.7119			N(no)	45	69	72	49	45	93	44
								Pearson	3.871	0.6941			N(yes)	5	12	10	5	8	13	11
													N (total)	50	81	82	54	53	106	55
													P<0.05
Aphids (0/1)		480	6	3.01904	0.0097			Likelihood Ratio	6.038	0.4189			N(no)	34	52	59	35	34	68	29
								Pearson	6.076	0.4148			N(yes)	16	29	22	19	19	38	26
													N (total)	50	81	81	54	53	106	55
													P<0.05
Rust (0/1)		485	6	10.2439	0.0449			Likelihood Ratio	20.488	0.0023			N(no)	5	16	29	7	8	14	8
								Pearson	22.729	0.0009			N(yes)	46	66	53	47	47	92	47
													N (total)	51	82	82	54	55	106	55
													P<0.05			*
Venturia (0/1)		481	6	1.7523	0.0211			Likelihood Ratio	3.505	0.7434			N(no)	48	79	78	51	52	99	54
								Pearson	3.394	0.758			N(yes)	2	3	3	3	1	7	1
													N (total)	50	82	81	54	53	106	55
													P<0.05
Miners (0/1)		485	6	5.50947	0.0406			Likelihood Ratio	11.019	0.0878			N(no)	43	80	78	47	50	97	51
								Pearson	10.709	0.0978			N(yes)	8	2	4	7	4	10	4
													N (total)	51	82	82	54	54	107	55
													P<0.05

## Sheet: Tab S6 Promoter effect
Material behind table and graphs: "Modification of cell wall acetylation affects field performance, phenolic composition of foliage and resistance to biotic stress factors in aspen in a construct-dependent fashion"
By: M. Derba-Maceluch, F. Amini, E.N. Donev, P. M.-A. Pawar, L. Michaud, U. Johansson, B.R. Albrectsen, E. J. Mellerowicz
Table S6. Effects of promoter and transgene analyzed by a 2-way ANOVA model including the effects of promoter (fixed), transgene (fixed) and their interaction.
Dwarf lines were excluded from analyses. Significant effects ( p≤0.05) are in red font. Downregulation is shown in red shading, upregulation in green shading. Data with dwarf lines excluded
Model	Fixed effect								Fixed effect						Fixed effect (promoter)					Fixed effect (transgene)					Fixed effect (interaction)
Y			Source	DF	Sum of Squares	Mean Square	F ratio	Prob>F			Factor	DF	Sum of Squares	F	P				35S	WP			AnAXE1	HjAXE				35S:AnAXE1	35S:HjAXE	WP:AnAXE1	WP:HjAXE
Height-2014			Model	3	2679.06	893.02	2.7002	0.0457*			Promoter	1	2053.68	6.2098	0.0132*			mean	82.0417	87.1384			82.8021	86.378			mean	81.0952	82.9881	84.5089	89.7679
(cm)			Error	332	109798	330.717					Transgene	1	1010.93	3.0568	0.0813			s.e.	1.40305	1.48816			1.31244	1.56866			s.e.	1.98422	1.98422	1.71838	2.43016
			Total	335	112477						Transgene*Promoter	1	223.943	0.6771	0.4112												Tukey p ≤ 0.05
Height-2015			Model	3	4098.23	1366.08	2.756	0.0425*			Promoter	1	3002.06	6.0565	0.0144*			mean	105.051	111.226			106.113	110.164			mean	102.506	107.595	109.721	112.732
(cm)			Error	330	163574	495.68					Transgene	1	1291.25	2.605	0.1075			s.e.	1.72286	1.82462			1.61537	1.92044			s.e.	2.44378	2.42919	2.11319	2.97513
			Total	333	167673						Transgene*Promoter	1	84.9527	0.1714	0.6792												Tukey p ≤ 0.05
Height-2016			Model	3	17120.8	5706.93	3.5012	0.0158*			Promoter	1	14859.9	9.1166	0.0027*			mean	154.953	168.693			160.164	163.482			mean	157.084	152.821	163.243	174.143
(cm)			Error	330	537898	1629.99					Transgene	1	866.718	0.5317	0.4664			s.e.	3.12423	3.30876			2.9293	3.48252			s.e.	4.43153	4.40508	3.83205	5.39509
			Total	333	555019						Transgene*Promoter	1	4523.93	2.7754	0.0967												Tukey p ≤ 0.05
Height-2017			Model	3	102078	34026.1	9.0171	<.0001*			Promoter	1	97268.7	25.7767	<.0001*			mean	254.002	289.183			271.399	271.786			mean	259.253	248.75	283.545	294.821
(cm)			Error	329	1.24149e+06	3773.5					Transgene	1	11.738	0.0031	0.9556			s.e.	4.7536	5.04205			4.46567	5.29875			s.e.	6.7427	6.70245	5.85702	8.20879
			Total	332	1.34357e+06						Transgene*Promoter	1	9318.56	2.4695	0.117												Tukey p ≤ 0.05
Diamater-2014			Model	3	5.96429	1.9881	3.3556	0.0192*			Promoter	1	5.05952	8.5396	0.0037*			mean	5.05952	5.3125			5.11607	5.25595			mean	5.03571	5.08333	5.19643	5.42857
(mm)			Error	332	196.702	0.59248					Transgene	1	1.54692	2.6109	0.1071			s.e.	0.0593856	0.0629879			0.0555501	0.0663951			s.e.	0.0839839	0.0839839	0.0727322	0.102859
			Total	335	202.667						Transgene*Promoter	1	0.672969	1.1359	0.2873												Tukey p ≤ 0.05
Diameter-2015			Model	3	25.9513	8.65043	1.663	0.1748			Promoter	1	22.2262	4.2728	0.0395*			mean	8.8494	9.38079			8.99805	9.23214			mean	8.6988	9	9.2973	9.46429
(mm)			Error	330	1716.59	5.20178					Transgene	1	4.31344	0.8292	0.3632			s.e.	0.176492	0.186917			0.16548	0.196733			s.e.	0.250344	0.248849	0.216478	0.304777
			Total	333	1742.54						Transgene*Promoter	1	0.354474	0.0681	0.7942												Tukey p ≤ 0.05
Diameter -2016			Model	3	249.703	83.2344	2.6119	0.0513			Promoter	1	227.035	7.1244	0.0080*			mean	17.0794	18.7778			17.7768	18.0804			mean	17.3373	16.8214	18.2162	19.3393
(mm)			Error	330	10516.2	31.8674					Transgene	1	7.25376	0.2276	0.6336			s.e.	0.43684	0.462643			0.409585	0.486938			s.e.	0.619633	0.615933	0.535811	0.754361
			Total	333	10765.9						Transgene*Promoter	1	52.8598	1.6587	0.1987												Tukey p ≤ 0.05
Diameter-2017			Model	3	1804.37	601.456	8.7674	<.0001*			Promoter	1	1603.5	23.374	<.0001*			mean	28.6531	33.1703			31.1478	30.6756			mean	29.7229	27.5833	32.5727	33.7679
(mm)			Error	329	22569.9	68.602					Transgene	1	17.5231	0.2554	0.6136			s.e.	0.640939	0.679831			0.602117	0.714443			s.e.	0.909135	0.903707	0.789716	1.10681
			Total	332	24374.3						Transgene*Promoter	1	218.466	3.1846	0.0753												Tukey p ≤ 0.05
Volume-2014			Model	3	85.3358	28.4453	4.2619	0.0057*			Promoter	1	33.0491	9.3086	0.0025*			mean	5.88153	6.76802			6.0015	6.64805			mean	5.74854	6.01453	6.25446	7.28158
(cm3)			Error	332	2215.87	6.6743					Transgene	1	62.1289	4.9517	0.0267*			s.e.	0.199319	0.21141			0.186446	0.222845			s.e.	0.28188	0.28188	0.244115	0.345231
			Total	335	2301.21						Transgene*Promoter	1	11.4496	1.7155	0.1912												Tukey p ≤ 0.05
Volume-2015			Model	3	2254.93	751.643	2.2379	0.0837			Promoter	1	448.594	5.6336	0.0182*			mean	24.4093	29.3015			25.6644	28.0464			mean	22.9406	25.8779	28.3881	30.2149
(cm3)			Error	332	111510	335.872					Transgene	1	1892.16	1.3356	0.2486			s.e.	1.41395	1.49972			1.32262	1.58084			s.e.	1.99962	1.99962	1.73172	2.44902
			Total	335	113765						Transgene*Promoter	1	24.3738	0.0726	0.7878												Tukey p ≤ 0.05
Volume-2016			Model	3	137007	45669.1	2.5178	0.0581			Promoter	1	4306.64	6.5792	0.0108*			mean	148.199	187.051			163.935	171.315			mean	155.294	141.104	172.575	201.527
(cm3)			Error	332	6.02205e+06	18138.7					Transgene	1	119338	0.2374	0.6264			s.e.	10.3908	11.0211			9.71969	11.6173			s.e.	14.6948	14.6948	12.7261	17.9974
			Total	335	6159060						Transgene*Promoter	1	36786.9	2.0281	0.1554												Tukey p ≤ 0.05
Volume-2017			Model	3	7589919	2529973	8.188	<.0001*			Promoter	1	7897	22.6538	<.0001*			mean	651.298	948.851			805.072	795.077			mean	710.485	592.112	899.659	998.043
(cm3)			Error	332	102582641	308984					Transgene	1	6.99966e+06	0.0256	0.8731			s.e.	42.8858	45.4872			40.116	47.9478			s.e.	60.6496	60.6496	52.5241	74.2803
			Total	335	110172560						Transgene*Promoter	1	928615	3.0054	0.0839												Tukey p ≤ 0.05
Chlorophyll			Model	3	82.5767	27.5256	22.4834	<.0001*			Promoter	1	47.769	39.0186	<.0001*			mean	10.3264	11.4263			11.1741	10.5787			mean	10.9392	9.71369	11.409	11.4437
index			Error	163	199.555	1.2243					Transgene	1	13.9973	11.4333	0.0009*			s.e.	0.120021	0.128836			0.113821	0.134345			s.e.	0.170731	0.168734	0.150571	0.209102
			Total	166	282.131						Transgene*Promoter	1	15.6765	12.8049	0.0005*												Tukey p ≤ 0.05	A	B	A	A
Chewing			Model	3	4146.13	1382.04	26.8352	<.0001*			Promoter	1	1709.53	33.194	<.0001*			mean	10.9329	6.22243			10.0968	7.05854			mean	14.5488	7.31707	5.64486	6.8
(% damage)			Error	322	16583.4	51.5					Transgene	1	711.213	13.8097	0.0002*			s.e.	0.560385	0.595337			0.526636	0.625389			s.e.	0.792504	0.792504	0.693772	0.96767
			Total	325	20729.5						Transgene*Promoter	1	1354.82	26.3066	<.0001*												Tukey p ≤ 0.05	A	B	B	B
CT (mg/g DW)			Model	3	26308.2	8769.41	15.7475	<.0001*			Promoter	1	1014.48	1.8217	0.179			mean	117.371	112.311			126.154	103.527			mean	133.89	100.852	118.419	106.202
			Error	164	91328	556.88					Transgene	1	20284.6	36.4255	<.0001*			s.e.	2.55977	2.73923			2.41785	2.86527			s.e.	3.64129	3.5987	3.18199	4.45965
			Total	167	117636						Transgene*Promoter	1	4293.93	7.7107	0.0061*												Tukey p ≤ 0.05	A	C	B	BC
Leaf weight			Model	3	0.00257489	0.000858	6.0105	0.0007*			Promoter	1	0.00120892	8.4658	0.0041*			mean	0.0779568	0.0834775			0.0822468	0.0791875			mean	0.0818227	0.0740909	0.0826709	0.0842842
(g)			Error	164	0.0234192	0.000143					Transgene	1	0.00037122	2.5996	0.1088			s.e.	0.00128999	0.00139144			0.00123768	0.00143817			s.e.	0.00186626	0.00178139	0.00162618	0.00225832
			Total	167	0.0259941						Transgene*Promoter	1	0.00086598	6.0642	0.0148*												Tukey p ≤ 0.05	A	B	A	A
Phenylalanine			Model	3	43666982	14555661	1.9222	0.1399			Promoter	1	12222018	1.614	0.2106			mean	73094.9	74131.9			74247	532.881			mean	73386.7	72803.2	75107.3	73156.5
			Error	44	333182098	7.57232e+06					Transgene	1	18249785	2.4101	0.1277			s.e.	550.798	602.362			72979.9	618.269			s.e.	794.372	763.208	710.508	972.903
			Total	47	376849080						Transgene*Promoter	1	5313024	0.7016	0.4068												Tukey p ≤ 0.05
Caffeic Acid			Model	3	36266000000	12090000000	4.3845	0.0087*			Promoter	1	24502000000	8.8867	0.0047*			mean	616502	570072			581888	604686			mean	600569	632435	563207	576938
			Error	44	121310000000	2757100000					Transgene	1	5907839506	2.1428	0.1504			s.e.	10510.1	11494			10168.2	11797.5			s.e.	15157.8	14563.2	13557.6	18564.5
			Total	47	157580000000						Transgene*Promoter	1	934550460	0.339	0.5634												Tukey p ≤ 0.05
Cholic Acid			Model	3	2917544013	972514671	0.2521	0.8594			Promoter	1	1958562938	0.5078	0.4799			mean	1.02017e+06	1.00705e+06			1.01929e+06	1.00793e+06			mean	1.02524e+06	1.01511e+06	1.01334e+06	1000756
			Error	44	169720000000	3857300000					Transgene	1	1464965312	0.3798	0.5409			s.e.	12431.4	13595.2			12027	13954.2			s.e.	17928.8	17225.4	16036	21958.2
			Total	47	172640000000						Transgene*Promoter	1	1.71832e+07	0.0045	0.9471												Tukey p ≤ 0.05
Arachidonic Acid			Model	3	2602030	867343	1.5318	0.2196			Promoter	1	159697	0.282	0.598			mean	6173.65	6292.19			6447	6018.84			mean	6418	5929.31	6476	6108.38
			Error	44	24913881	566225					Transgene	1	2.08364e+06	3.6799	0.0616			s.e.	150.616	164.717			145.717	169.066			s.e.	217.222	208.7	194.289	266.041
			Total	47	27515911						Transgene*Promoter	1	41649.1	0.0736	0.7875												Tukey p ≤ 0.05
Salicilic Acid			Model	3	61890000000	20630000000	5.2548	0.0035*			Promoter	1	25232000000	6.4269	0.0149*			mean	1.12049e+06	1.1676e+06			1.16487e+06	1.12322e+06			mean	1.1553e+06	1.08567e+06	1.17445e+06	1.16076e+06
			Error	44	172740000000	3925900000					Transgene	1	19724000000	5.0241	0.0301*			s.e.	12541.5	13715.6			12133.5	14077.8			s.e.	18087.6	17378	16178	22152.7
			Total	47	234630000000						Transgene*Promoter	1	8892278852	2.265	0.1395												Tukey p ≤ 0.05
Salicin			Model	3	35991000000000	12000000000000	1.6377	0.1943			Promoter	1	7396700000000	1.0097	0.3205			mean	6.58508e+06	5.77838e+06			6.60312e+06	5.76034e+06			mean	7.62549e+06	5.54468e+06	5.58076e+06	5975997
			Error	44	322330000000000	7326000000000					Transgene	1	8073200000000	1.1021	0.2995			s.e.	541750	592467			524127	608113			s.e.	781323	750670	698836	956921
			Total	47	358320000000000						Transgene*Promoter	1	17421000000000	2.3781	0.1302												Tukey p ≤ 0.05
Salicortin			Model	3	85665000000000	28560000000000	1.3534	0.2694			Promoter	1	83147000000000	3.9409	0.0534			mean	27622109	919399			28948280	29000624			mean	27844354	27399864	30052206	30601384
			Error	44	928340000000000	21100000000000					Transgene	1	31142000000	0.0015	0.9695			s.e.	30326795	1.00547e+06			889492	1.03202e+06			s.e.	1.32598e+06	1.27396e+06	1.18599e+06	1.62398e+06
			Total	47	1014000000000000						Transgene*Promoter	1	2805700000000	0.133	0.7171												Tukey p ≤ 0.05
Tremulacin			Model	3	249130000000000	83040000000000	2.6558	0.0601			Promoter	1	95198000000000	3.0445	0.088			mean	36713361	39607430			39146890	37173900			mean	39142855	34283867	39150926	40063934
			Error	44	1375800000000000	31270000000000					Transgene	1	44245000000000	1.415	0.2406			s.e.	1119275	1.22406e+06			1082866	1.25638e+06			s.e.	1.61424e+06	1.55091e+06	1.44382e+06	1.97703e+06
			Total	47	1625000000000000						Transgene*Promoter	1	94668000000000	3.0275	0.0889												Tukey p ≤ 0.05
HCH-salicortin			Model	3	1026600000000	342200000000	1.5948	0.2042			Promoter	1	6955748290	0.0324	0.8579			mean	1.76632e+06	1.79105e+06			1.91676e+06	1.6406e+06			mean	1.94176e+06	1.59087e+06	1.89177e+06	1.69034e+06
			Error	44	9441500000000	214600000000					Transgene	1	866830000000	4.0397	0.0506			s.e.	92719.6	101400			89703.5	104077			s.e.	133722	128476	119605	163775
			Total	47	10468000000000						Transgene*Promoter	1	63478000000	0.2958	0.5893												Tukey p ≤ 0.05
Cinnamoyl-salicortin			Model	3	509033321	169677774	1.7117	0.1784			Promoter	1	135192030	1.3638	0.2492			mean	20295.2	23744			23286.3	20752.9			mean	24055.7	16534.8	22516.9	24971.1
			Error	44	4361539099	99125889					Transgene	1	72946360	0.7359	0.3956			s.e.	1992.83	2179.4			1928.01	2236.95			s.e.	2874.11	2761.35	2570.68	3520.05
			Total	47	4870572420						Transgene*Promoter	1	282739068	2.8523	0.0983												Tukey p ≤ 0.05
Catechin			Model	3	22827000000000	7609000000000	3.4219	0.0252*			Promoter	1	9865300000000	4.4366	0.0409*			mean	19920506	18988865			20056147	18853224			mean	20517646	19323366	19594648	18383082
			Error	44	97839000000000	2224000000000					Transgene	1	16447000000000	7.3965	0.0093*			s.e.	298475	326417			288765	335037			s.e.	430466	413578	385021	527211
			Total	47	120670000000000						Transgene*Promoter	1	849013320	0.0004	0.9845												Tukey p ≤ 0.05
p-coumaric Acid			Model	3	16825000000	5608300000	11.3282	<.0001*			Promoter	1	2541723481	5.134	0.0284*			mean	93571.1	78617			96679	75509.1			mean	117312	69830.5	76046.3	81187.8
			Error	44	21783000000	495076032					Transgene	1	5093890695	10.2891	0.0025*			s.e.	4453.63	4870.56			4308.75	4999.18			s.e.	6423.11	6171.12	5745	7866.67
			Total	47	38608000000						Transgene*Promoter	1	7868595458	15.8937	0.0002*												Tukey p ≤ 0.05	A	B	B	B
Benzoic Acid			Model	3	40523138	13507713	3.6742	0.0190*			Promoter	1	3957	0.0011	0.974			mean	8090.94	8072.28			8838.28	7324.94			mean	9339.5	6842.38	8337.07	7807.5
			Error	44	161762387	3.67642e+06					Transgene	1	26030701	7.0805	0.0108*			s.e.	383.787	419.716			371.303	430.8			s.e.	553.505	531.791	495.07	677.903
			Total	47	202285525						Transgene*Promoter	1	11000267	2.9921	0.0907												Tukey p ≤ 0.05
Acetyl-salicilin			Model	3	881691	293897	1.7238	0.1771			Promoter	1	270439	1.5862	0.215			mean	709.273	868.179			841.139	736.312			mean	872.545	546	809.733	926.625
			Error	41	6.99022e+06	170493					Transgene	1	117688	0.6903	0.4109			s.e.	88.0323	90.3851			81.9536	95.931			s.e.	124.496	124.496	106.612	145.985
			Total	44	7.87191e+06						Transgene*Promoter	1	526491	3.088	0.0863												Tukey p ≤ 0.05
Tremuloidin			Model	3	29926000000000	9975000000000	1.96	0.1339			Promoter	1	5906200000000	1.1605	0.2872			mean	2.99137e+06	2270519			3.11766e+06	2.14424e+06			mean	3.97797e+06	2.00478e+06	2.25735e+06	2.28369e+06
			Error	44	223940000000000	5089000000000					Transgene	1	10770000000000	2.1161	0.1529			s.e.	451559	493833			436870	506874			s.e.	651247	625698	582493	797612
			Total	47	253860000000000						Transgene*Promoter	1	11361000000000	2.2322	0.1423												Tukey p ≤ 0.05
OH-tremuloidin			Model	3	102010000000	34000000000	6.9782	0.0006*			Promoter	1	96858000000	19.8782	<.0001*			mean	391614	299301			345969	344945			mean	379038	404189	312900	285702
			Error	44	214390000000	4872600000					Transgene	1	1.19131e+07	0.0024	0.9608			s.e.	13972	15280			13517.5	15683.5			s.e.	20150.6	19360.1	18023.3	24679.4
			Total	47	316400000000						Transgene*Promoter	1	7786809244	1.5981	0.2128												Tukey p ≤ 0.05
Cinnamoyl-salicin			Model	3	101814298	33938099	3.2607	0.0302*			Promoter	1	80872517	7.7701	0.0078*			mean	11150.9	13818.4			12465.6	12503.7			mean	11944.2	10357.6	12986.9	14649.9
			Error	44	457960542	10408194					Transgene	1	16574	0.0016	0.9683			s.e.	645.751	706.205			624.746	724.854			s.e.	931.316	894.779	832.994	1140.62
			Total	47	559774840						Transgene*Promoter	1	30007067	2.883	0.0966												Tukey p ≤ 0.05
Acetyl-salicortin			Model	3	71890000000	23960000000	3.1704	0.0335*			Promoter	1	36912000000	4.8835	0.0324*			mean	368217	425204			406071	387350			mean	403962	332471	408180	442228
			Error	44	332570000000	7558400000					Transgene	1	3983693492	0.5271	0.4717			s.e.	17401.8	19030.9			16835.7	19533.5			s.e.	25097.2	24112.6	22447.6	30737.7
			Total	47	404460000000						Transgene*Promoter	1	31650000000	4.1874	0.0467*												Tukey p ≤ 0.05	AB	B	AB	A
Salicoyl-tremuloidin			Model	3	47796892	15932297	6.0479	0.0015*			Promoter	1	18990032	7.2086	0.0102*			mean	2468.59	3761.17			3510.94	2718.82			mean	3518.42	1418.77	3503.47	4018.88
			Error	44	115911464	2.63435e+06					Transgene	1	7131711	2.7072	0.107			s.e.	324.874	355.288			314.306	364.67			s.e.	468.54	450.158	419.074	573.841
			Total	47	163708356						Transgene*Promoter	1	19431851	7.3763	0.0094*												Tukey p ≤ 0.05	A	B	A	A
Acetyl-tremulacin			Model	3	594664040	198221347	18.3555	<.0001*			Promoter	1	141006613	13.0573	0.0008*			mean	6600	3077.8			7056.26	2621.54			mean	10906.9	2293.08	3205.6	2950
			Error	44	475157575	10799036					Transgene	1	223534535	20.6995	<.0001*			s.e.	657.764	719.343			636.368	738.338			s.e.	948.641	911.425	848.49	1161.84
			Total	47	1069821615						Transgene*Promoter	1	198509777	18.3822	<.0001*												Tukey p ≤ 0.05	A	B	B	B
HCH-Ac-salicortin			Model	3	688506008	229502003	4.3122	0.0095*			Promoter	1	378047881	7.1033	0.0107*			mean	18769.6	24536.9			19553.9	23752.6			mean	15154.3	22384.9	23953.5	25120.2
			Error	44	2341756155	53221731					Transgene	1	200372977	3.7649	0.0588			s.e.	1460.23	1596.94			1412.73	1639.11			s.e.	2105.98	2023.36	1883.64	2579.29
			Total	47	3030262163						Transgene*Promoter	1	104482345	1.9632	0.1682												Tukey p ≤ 0.05
HCH-tremulacin			Model	3	287630000000	95880000000	2.2459	0.0962			Promoter	1	1201586134	0.0281	0.8675			mean	801798	812080			876218	737659			mean	901451	702145	850986	773174
			Error	44	1878300000000	42690000000					Transgene	1	218210000000	5.1118	0.0288*			s.e.	41355.6	45227.2			40010.3	46421.5			s.e.	59643.9	57304	53347.1	73048.5
			Total	47	2165900000000						Transgene*Promoter	1	41944000000	0.9826	0.327												Tukey p ≤ 0.05

## Sheet: Tab S7 Strategy effect
Material behind table and graphs: "Modification of cell wall acetylation affects field performance, phenolic composition of foliage and resistance to biotic stress factors in aspen in a construct-dependent fashion"
By: M. Derba-Maceluch, F. Amini, E.N. Donev, P. M.-A. Pawar, L. Michaud, U. Johansson, B.R. Albrectsen, E. J. Mellerowicz
Table S7. Effects of of synthetic versus post-synthetic acetylation reduction strategy analyzed by a nested ANOVA model.
ANOVA nested model including the effect of synthetic/postsynthetic strategy (fixed), construct nested within strategy (fixed), line nested within construct and strategy (fixed); Dwarf lines excluded. Significant effects (P≤0.05) in red font. Construct Means and s.e.; Tukey tests letters provided for significant construct effects. Downregulation is shown in red shading, upregulation in green shadi…
Model					Analysis of Variance							Test effect								Means and s.e.								Means and s.e.
Y	RSquare	RSquare Adj	Root Mean Square Error	Mean of Response	Observations (or Sum Wgts)	N		Source	DF	Sum of Squares	Mean Square	F Ratio	N		Source	Nparm	DF	Sum of Squares	F Ratio	Prob > F	N			synthetic	postsynthetic	N			[synthetic]35S:RWA-CD	[post]35S:AnAXE1	[post]35S:HjAXE
Height-2014 (cm)	0.025178	-0.00686	17.539	82.1176	221			Model	7	1692.33	241.762	0.7859			Strategy	1	1	4.957	0.0161	0.8991			mean	82.3585	82.0417			mean	82.3929	81.0952	82.9881
								Error	213	65522.6	307.618	Prob > F			Construct(strategy)	1	1	150.482	0.4892	0.4851			s.e.	2.41304	1.35317			s.e.	2.41304	1.91367	1.91367
								C. Total	220	67214.9		0.5998			Line[Construct(strategy)]	5	5	1537.81	0.9998	0.4188								Tukey p ≤ 0.05
Height-2015 (cm)	0.027643	-0.00446	22.0334	105.677	220			Model	7	2925.91	417.988	0.861			Strategy	1	1	256.327	0.528	0.4683			mean	107.604	105.066			mean	107.559	102.467	107.595
								Error	212	102920	485.473	Prob > F			Construct(strategy)	1	1	1097.62	2.2609	0.1342			s.e.	3.03139	1.70516			s.e.	3.03139	2.41884	2.40405
								C. Total	219	105846		0.5383			Line[Construct(strategy)]	5	5	1585.49	0.6532	0.6594								Tukey p ≤ 0.05
Height-2016 (cm)	0.014039	-0.01852	39.5403	156.459	220			Model	7	4719.45	674.21	0.4312			Strategy	1	1	1684.15	1.0772	0.3005			mean	161.245	154.94			mean	161.412	157.047	152.821
								Error	212	331449	1563.44	Prob > F			Construct(strategy)	1	1	745.236	0.4767	0.4907			s.e.	5.44001	3.06001			s.e.	5.44001	4.34076	4.31421
								C. Total	219	336169		0.882			Line[Construct(strategy)]	5	5	2361.36	0.3021	0.9113								Tukey p ≤ 0.05
Height-2017 (cm)	0.04896	0.017558	64.5866	259.673	220			Model	7	45526.9	6503.84	1.5591			Strategy	1	1	22767.5	5.458	0.0204			mean	277.642	253.97			mean	277.706	259.025	248.75
								Error	212	884344	4171.43	Prob > F			Construct(strategy)	1	1	4406.71	1.0564	0.3052			s.e.	8.8859	4.99832			s.e.	8.8859	7.09034	7.04698
								C. Total	219	929870		0.1491			Line[Construct(strategy)]	5	5	18378.1	0.8811	0.4946								Tukey p ≤ 0.05
Height-final 2018 (cm)	0.072807	0.042047	62.0919	268.192	219			Model	7	63878.8	9125.54	2.367			Strategy	1	1	35215.2	9.134	0.0028			mean	290.462	261.257			mean	291.027	266.59	255.726
								Error	211	813489	3855.4	Prob > F			Construct(strategy)	1	1	4926.08	1.2777	0.2596			s.e.	8.63618	4.80525			s.e.	8.63618	6.81647	6.77478
								C. Total	218	877368		0.0239			Line[Construct(strategy)]	5	5	24888.7	1.2911	0.2689								Tukey p ≤ 0.05
Diameter-2014 (mm)	0.036819	0.005165	0.78476	5.0905	221			Model	7	5.01433	0.716333	1.1632			Strategy	1	1	0.632784	1.0275	0.3119			mean	5.18868	5.05952			mean	5.185	5.03571	5.08333
								Error	213	131.176	0.615848	Prob > F			Construct(strategy)	1	1	0.0952381	0.1546	0.6945			s.e.	0.107968	0.0605456			s.e.	0.107968	0.0856244	0.0856244
								C. Total	220	136.19		0.3253			Line[Construct(strategy)]	5	5	4.24702	1.3792	0.2332								Tukey p ≤ 0.05
Diameter-2015 (mm)	0.009945	-0.02275	2.15904	8.88636	220			Model	7	9.92629	1.41804	0.3042			Strategy	1	1	0.917898	0.1969	0.6577			mean	9	8.8503			mean	9	8.69753	9
								Error	212	988.233	4.66148	Prob > F			Construct(strategy)	1	1	3.8189	0.8192	0.3664			s.e.	0.297044	0.167087			s.e.	0.297044	0.237021	0.235571
								C. Total	219	998.159		0.9515			Line[Construct(strategy)]	5	5	5.23708	0.2247	0.9516								Tukey p ≤ 0.05
Diameter-2016 (mm)	0.020664	-0.01167	5.56182	17.3545	220			Model	7	138.376	19.768	0.639			Strategy	1	1	53.8	1.7392	0.1887			mean	18.2264	17.0778			mean	18.2379	17.3386	16.8214
								Error	212	6557.97	30.9338	Prob > F			Construct(strategy)	1	1	11.1657	0.361	0.5486			s.e.	0.765201	0.430426			s.e.	0.765201	0.610579	0.606844
								C. Total	219	6696.35		0.7233			Line[Construct(strategy)]	5	5	74.1891	0.4797	0.7912								Tukey p ≤ 0.05
Diameter-2017 (mm)	0.054096	0.022863	8.37728	29.4682	220			Model	7	850.858	121.551	1.732			Strategy	1	1	464.763	6.6225	0.0108			mean	32.0566	28.6467			mean	32.0514	29.7134	27.5833
								Error	212	14877.9	70.179	Prob > F			Construct(strategy)	1	1	189.393	2.6987	0.1019			s.e.	1.15256	0.648313			s.e.	1.15256	0.919661	0.914037
								C. Total	219	15728.8		0.103			Line[Construct(strategy)]	5	5	191.954	0.547	0.7405								Tukey p ≤ 0.05
Diameter-final 2018 (mm)	0.070129	0.03928	8.0983	29.621	219			Model	7	1043.63	149.089	2.2733			Strategy	1	1	645.87	9.8482	0.0019			mean	32.6731	28.6707			mean	32.7173	29.761	27.5833
								Error	211	13837.9	65.583	Prob > F			Construct(strategy)	1	1	197.956	3.0184	0.0838			s.e.	1.12637	0.626723			s.e.	1.12637	0.889035	0.883598
								C. Total	218	14881.5		0.0299			Line[Construct(strategy)]	5	5	208.592	0.6361	0.6724								Tukey p ≤ 0.05
Volume-2014 (cm3)	0.044915	0.013963	2.57886	5.85146	224			Model	7	67.5549	9.6507	1.4511			Strategy	1	1	0.607715	0.0914	0.7627			mean	5.76125	5.88155			mean	5.76125	5.74854	6.01453
								Error	216	1436.51	6.65053	Prob > F			Construct(strategy)	1	1	2.97168	0.4468	0.5046			s.e.	0.344615	0.198963			s.e.	0.344615	0.281377	0.281377
								C. Total	223	1504.07		0.1863			Line[Construct(strategy)]	5	5	63.9755	1.9239	0.0915								Tukey p ≤ 0.05
Volume-2015 (cm3)	0.018956	-0.01284	15.549	24.3786	224			Model	7	1009.09	144.155	0.5962			Strategy	1	1	0.632675	0.0026	0.9592			mean	24.2865	24.4093			mean	24.2865	22.9406	25.8779
								Error	216	52223	241.773	Prob > F			Construct(strategy)	1	1	362.365	1.4988	0.2222			s.e.	2.07783	1.19964			s.e.	2.07783	1.69654	1.69654
								C. Total	223	53232		0.7587			Line[Construct(strategy)]	5	5	646.089	0.5345	0.7501								Tukey p ≤ 0.05
Volume- 2016 (cm3)	0.018963	-0.01283	125.326	150.155	224			Model	7	65577.8	9368.25	0.5965			Strategy	1	1	2569.59	0.1636	0.6863			mean	156.021	148.199			mean	156.021	155.294	141.104
								Error	216	3392611	15706.5	Prob > F			Construct(strategy)	1	1	8457.43	0.5385	0.4639			s.e.	16.7474	9.66909			s.e.	16.7474	13.6742	13.6742
								C. Total	223	3.45819e+06		0.7585			Line[Construct(strategy)]	5	5	54550.7	0.6946	0.628								Tukey p ≤ 0.05
Volume-2017 (cm3)	0.060388	0.029937	496.291	696.629	224			Model	7	3.41922e+06	488460	1.9832			Strategy	1	1	1.38083e+06	5.6062	0.0188			mean	832.62	651.3			mean	832.618	710.485	592.112
								Error	216	53201926	246305	Prob > F			Construct(strategy)	1	1	588509	2.3893	0.1236			s.e.	66.3197	38.2897			s.e.	66.3197	54.1498	54.1498
								C. Total	223	5.66211e+07		0.0586			Line[Construct(strategy)]	5	5	1.44988e+06	1.1773	0.3213								Tukey p ≤ 0.05
Volume-final 2018 (cm3)	0.061221	0.030797	504.722	715.21	224			Model	7	3.58833e+06	512619	2.0123			Strategy	1	1	1.38881e+06	5.4518	0.0205			mean	851.59	669.75			mean	851.592	731.758	607.74
								Error	216	55024755	254744	Prob > F			Construct(strategy)	1	1	645975	2.5358	0.1128			s.e.	67.4463	38.9401			s.e.	67.4463	55.0697	55.0697
								C. Total	223	58613090		0.0548			Line[Construct(strategy)]	5	5	1.55355e+06	1.2197	0.3009								Tukey p ≤ 0.05
Apical Dominance 2017	0.072702	0.010883	2.11817	6.73451	113			Model	7	36.9354	5.27649	1.176			Strategy	1	1	0.822404	0.1833	0.6694			mean	6.89286	6.68235			mean	6.89286	7.19048	6.2
								Error	105	471.1	4.48667	Prob > F			Construct(strategy)	1	1	20.8334	4.6434	0.0335			s.e.	0.400298	0.229824			s.e.	0.400298	0.326842	0.32319
								C. Total	112	508.035		0.3228			Line[Construct(strategy)]	5	5	14.5664	0.6493	0.6626								Tukey p ≤ 0.05	A	A	A
Branching 2017	0.043	-0.0208	3.9671	29.1062	113			Model	7	74.2495	10.6071	0.674			Strategy	1	1	7.86444	0.4997	0.4812			mean	29.5714	28.9529			mean	29.5714	28.5238	29.3968
								Error	105	1652.48	15.7379	Prob > F			Construct(strategy)	1	1	16.1851	1.0284	0.3129			s.e.	0.749711	0.430434			s.e.	0.749711	0.612137	0.605297
								C. Total	112	1726.73		0.6936			Line[Construct(strategy)]	5	5	50.9037	0.6469	0.6645								Tukey p ≤ 0.05
weight of 1 leaf (g)	0.214128	0.162231	0.012265	0.080031	114			Model	7	0.0043444	0.000621	4.126			Strategy	1	1	0.00175253	11.651	0.0009			mean	0.086952	0.077777			mean	0.0869524	0.08173	0.073948
								Error	106	0.0159443	0.00015	Prob > F			Construct(strategy)	1	1	0.00129652	8.6194	0.0041			s.e.	0.00231778	0.00132531			s.e.	0.00231778	0.00191656	0.001831
								C. Total	113	0.0202888		0.0005			Line[Construct(strategy)]	5	5	0.0012836	1.7067	0.1393								Tukey p ≤ 0.05	A	A	B
Chewing 2017 (damage%)	0.293169	0.269267	7.2879	9.84186	215			Model	7	4560.14	651.448	12.2652			Strategy	1	1	836.4	15.7474	<.0001			mean	6.3333	10.9329			mean	6.30357	14.5838	7.33157
								Error	207	10994.5	53.113	Prob > F			Construct(strategy)	1	1	2155.74	40.5874	<.0001			s.e.	1.02545	0.569173			s.e.	1.02545	0.804932	0.804932
								C. Total	214	15554.6		<.0001			Line[Construct(strategy)]	5	5	1592.91	5.9981	<.0001								Tukey p ≤ 0.05	B	A	B
Chlorophyll 2017	0.566481	0.53758	1.0332	10.7686	113			Model	7	146.465	20.9235	19.6006			Strategy	1	1	69.6653	65.2605	<.0001			mean	12.1329	10.3192			mean	12.1329	10.9392	9.68904
								Error	105	112.087	1.0675	Prob > F			Construct(strategy)	1	1	33.1873	31.0889	<.0001			s.e.	0.195256	0.112103			s.e.	0.195256	0.159426	0.157644
								C. Total	112	258.552		<.0001			Line[Construct(strategy)]	5	5	45.2719	8.4819	<.0001								Tukey p ≤ 0.05	A	B	C
Condensed tannins (mg/g DW)	0.339964	0.295962	23.1256	113.939	113			Model	7	28922.9	4131.85	7.726			Strategy	1	1	3680.46	6.882	0.01			mean	104.112	117.176			mean	104.112	133.89	100.774
								Error	105	56153.5	534.8	Prob > F			Construct(strategy)	1	1	23288.8	43.5472	<.0001			s.e.	4.37034	2.50916			s.e.	4.37034	3.56836	3.52849
								C. Total	112	85076.5		<.0001			Line[Construct(strategy)]	5	5	2136.75	0.7991	0.5528								Tukey p ≤ 0.05	B	A	B
Acetyl-salicin (p.a.)	0.359391	0.155561	334.997	697.2	30			Model	7	1.38509e+06	197870	1.7632			Strategy	1	1	4624.8	0.0412	0.841			mean	664	709.273			mean	664	852.667	531.778
								Error	22	2.4689e+06	112223	Prob > F			Construct(strategy)	1	1	545134	4.8576	0.0383			s.e.	118.439	72.797			s.e.	118.439	101.936	103.955
								C. Total	29	3.85399e+06		0.146			Line[Construct(strategy)]	5	5	786589	1.4018	0.2623								Tukey p ≤ 0.05	A	A	A
Acetyl-salicortin (p.a.)	0.495326	0.354017	77746.9	388911	33			Model	7	148320000000	21190000000	3.5053			Strategy	1	1	52141000000	8.6261	0.007			mean	458047	366787			mean	458047	403962	326469
								Error	25	151110000000	6044600000	Prob > F			Construct(strategy)	1	1	37274000000	6.1665	0.0201			s.e.	27487.7	15603.3			s.e.	27487.7	22443.6	21682.6
								C. Total	32	299430000000		0.0093			Line[Construct(strategy)]	5	5	65948000000	2.1821	0.0884								Tukey p ≤ 0.05	A	AB	B
Acetyl-tremulacin (p.a.)	0.695059	0.609675	3475.98	5398.45	33			Model	7	688492067	98356010	8.1404			Strategy	1	1	113892844	9.4263	0.0051			mean	2182	6427.72			mean	2182	10906.9	2134.4
								Error	25	302060149	12082406	Prob > F			Construct(strategy)	1	1	477664440	39.5339	<.0001			s.e.	1228.94	697.605			s.e.	1228.94	1003.43	969.403
								C. Total	32	990552216		<.0001			Line[Construct(strategy)]	5	5	116245757	1.9242	0.1259								Tukey p ≤ 0.05	B	A	B
Arachidonic acid (p.a.)	0.371114	0.195026	604.501	6048.24	33			Model	7	5390995	770142	2.1075			Strategy	1	1	1.4889e+06	4.0745	0.0544			mean	5686.88	6163.88			mean	5686.88	6418	5947.88
								Error	25	9135535	365421	Prob > F			Construct(strategy)	1	1	1.37178e+06	3.754	0.0641			s.e.	213.723	121.319			s.e.	213.723	174.504	168.587
								C. Total	32	14526530		0.0803			Line[Construct(strategy)]	5	5	2.52176e+06	1.3802	0.2654								Tukey p ≤ 0.05
Benzoic acid (p.a.)	0.434083	0.275627	1953.4	8369.64	33			Model	7	73171919	10453131	2.7394			Strategy	1	1	10750522	2.8174	0.1057			mean	9396.63	8041			mean	9396.62	9339.5	6787.8
								Error	25	95394572	3.81578e+06	Prob > F			Construct(strategy)	1	1	40414177	10.5913	0.0033			s.e.	690.632	392.035			s.e.	690.632	563.899	544.778
								C. Total	32	168566492		0.0296			Line[Construct(strategy)]	5	5	23124176	1.212	0.3325								Tukey p ≤ 0.05	A	A	B
Caffeic acid (p.a.)	0.131835	-0.11125	56688.1	616753	33			Model	7	12200000000	1742800000	0.5423			Strategy	1	1	1.68735e+07	0.0053	0.9428			mean	615547	617139			mean	615547	600569	633865
								Error	25	80338000000	3213500000	Prob > F			Construct(strategy)	1	1	6881125877	2.1413	0.1558			s.e.	20042.3	11376.9			s.e.	20042.3	16364.4	15809.5
								C. Total	32	92538000000		0.7942			Line[Construct(strategy)]	5	5	5847883920	0.364	0.8683								Tukey p ≤ 0.05
Catechin (p.a.)	0.413798	0.249661	1655008	19462972	33			Model	7	48337000000000	6905000000000	2.5211			Strategy	1	1	20122000000000	7.3462	0.012			mean	18107820	19896620			mean	18107820	20517646	19345278
								Error	25	68476000000000	2739000000000	Prob > F			Construct(strategy)	1	1	8531100000000	3.1146	0.0898			s.e.	585134	332149			s.e.	585134	477760	461560
								C. Total	32	116810000000000		0.0416			Line[Construct(strategy)]	5	5	20044000000000	1.4636	0.237								Tukey p ≤ 0.05
Cholic acid (p.a)	0.101505	-0.15007	72326.9	1015438	33			Model	7	14774000000	2110600000	0.4035			Strategy	1	1	2314690297	0.4425	0.512			mean	1001269	1019972			mean	1.00127e+06	1.02524e+06	1.01642e+06
								Error	25	130780000000	5231200000	Prob > F			Construct(strategy)	1	1	482251021	0.0922	0.7639			s.e.	25571.4	14515.5			s.e.	25571.4	20879	20171
								C. Total	32	145550000000		0.8911			Line[Construct(strategy)]	5	5	12015000000	0.4594	0.8025								Tukey p ≤ 0.05
Cinnamoyl-salicin (p.a.)	0.454755	0.302086	2691.28	11356.2	33			Model	7	151022964	21574709	2.9787			Strategy	1	1	7222729	0.9972	0.3276			mean	12097	11119.2			mean	12097	11944.2	10064.6
								Error	25	181074815	7.24299e+06	Prob > F			Construct(strategy)	1	1	21930265	3.0278	0.0941			s.e.	951.511	540.122			s.e.	951.511	776.906	750.562
								C. Total	32	332097778		0.0205			Line[Construct(strategy)]	5	5	129519827	3.5764	0.0141								Tukey p ≤ 0.05
Cinnamoyl-salicortin (p.a.)	0.33233	0.145382	9756.39	20226.2	33			Model	7	1184472875	169210411	1.7777			Strategy	1	1	1885909	0.0198	0.8892			mean	20480.5	20144.8			mean	20480.5	24055.7	15788.7
								Error	25	2379677196	95187088	Prob > F			Construct(strategy)	1	1	424192883	4.4564	0.0449			s.e.	3449.4	1958.04			s.e.	3449.4	2816.43	2720.93
								C. Total	32	3564150071		0.1366			Line[Construct(strategy)]	5	5	830831153	1.7457	0.161								Tukey p ≤ 0.05	A	A	A
HCH-Ac-salicortin (p.a.)	0.672727	0.58109	6382.78	21735.5	33			Model	7	2093576816	299082402	7.3413			Strategy	1	1	849023725	20.8401	0.0001			mean	30552.1	18914.2			mean	30552.1	15154.3	22258.2
								Error	25	1018498636	40739945	Prob > F			Construct(strategy)	1	1	313227608	7.6885	0.0103			s.e.	2256.66	1280.98			s.e.	2256.66	1842.55	1780.07
								C. Total	32	3112075452		<.0001			Line[Construct(strategy)]	5	5	946489995	4.6465	0.0039								Tukey p ≤ 0.05	A	C	B
HCH-salicortin (p.a.)	0.670572	0.578333	342030	1824246	33			Model	7	5953300000000	850500000000	7.2699			Strategy	1	1	449500000000	3.8424	0.0612			mean	2027209	1759298			mean	2.02721e+06	1.94176e+06	1.56752e+06
								Error	25	2924600000000	117000000000	Prob > F			Construct(strategy)	1	1	869310000000	7.4309	0.0115			s.e.	120926	68643.2			s.e.	120926	98735.7	95387.7
								C. Total	32	8877900000000		<.0001			Line[Construct(strategy)]	5	5	4750000000000	8.1206	0.0001								Tukey p ≤ 0.05	A	A	B
HCH-Tremulacin (p.a.)	0.622974	0.517407	157872	793353	33			Model	7	1029600000000	147100000000	5.9012			Strategy	1	1	1130241148	0.0453	0.8331			mean	779420	797812			mean	779420	901451	684724
								Error	25	623090000000	24920000000	Prob > F			Construct(strategy)	1	1	291540000000	11.6974	0.0022			s.e.	55816.3	31683.9			s.e.	55816.3	45573.8	44028.5
								C. Total	32	1652600000000		0.0004			Line[Construct(strategy)]	5	5	779630000000	6.2562	0.0007								Tukey p ≤ 0.05	AB	A	B
OH-tremuloidin (p.a.)	0.38996	0.219149	71332	371816	33			Model	7	81315000000	11620000000	2.283			Strategy	1	1	40929000000	8.0437	0.0089			mean	308376	392117			mean	308376	379038	402207
								Error	25	127210000000	5088300000	Prob > F			Construct(strategy)	1	1	3331710191	0.6548	0.426			s.e.	25219.7	14315.9			s.e.	25219.7	20591.8	19893.6
								C. Total	32	208520000000		0.0607			Line[Construct(strategy)]	5	5	34868000000	1.3705	0.2689								Tukey p ≤ 0.05
p-coumaric acid (p.a.)	0.739398	0.666429	19658	87767.2	33			Model	7	27410000000	3915800000	10.1331			Strategy	1	1	2656998209	6.8757	0.0147			mean	72597.8	92621.4			mean	72597.8	117312	69795.3
								Error	25	9660881007	386435240	Prob > F			Construct(strategy)	1	1	14014000000	36.2647	<.0001			s.e.	6950.14	3945.22			s.e.	6950.14	5674.76	5482.34
								C. Total	32	37071000000		<.0001			Line[Construct(strategy)]	5	5	10913000000	5.6478	0.0013								Tukey p ≤ 0.05	B	A	B
Phenylalanine (p.a.)	0.293599	0.095807	2591.06	73422.9	33			Model	7	69758489	9965498	1.4844			Strategy	1	1	12053166	1.7953	0.1923			mean	74484.4	73083.3			mean	74484.4	73386.7	72759.2
								Error	25	167839481	6713579	Prob > F			Construct(strategy)	1	1	2443485	0.364	0.5517			s.e.	916.077	520.008			s.e.	916.077	747.974	722.611
								C. Total	32	237597970		0.2181			Line[Construct(strategy)]	5	5	55737032	1.6604	0.181								Tukey p ≤ 0.05
Salicin (p.a.)	0.461416	0.310612	2306174	6080497	33			Model	7	113910000000000	16270000000000	3.0597			Strategy	1	1	21721000000000	4.084	0.0541			mean	4633719	6543466			mean	4.63372e+06	7.62549e+06	5.43137e+06
								Error	25	132960000000000	5318000000000	Prob > F			Construct(strategy)	1	1	29881000000000	5.6184	0.0258			s.e.	815356	462834			s.e.	815356	665735	643161
								C. Total	32	246870000000000		0.0181			Line[Construct(strategy)]	5	5	64789000000000	2.4364	0.0626								Tukey p ≤ 0.05	B	A	AB
Salicortin (p.a.)	0.471831	0.323944	4301984	28605967	33			Model	7	413320000000000	59050000000000	3.1905			Strategy	1	1	106530000000000	5.7561	0.0242			mean	31708303	27613219			mean	31708303	27844354	27180174
								Error	25	462680000000000	18510000000000	Prob > F			Construct(strategy)	1	1	2738100000000	0.1479	0.7038			s.e.	1520981	863379			s.e.	1520981	1.24188e+06	1199766
								C. Total	32	876000000000000		0.0148			Line[Construct(strategy)]	5	5	310460000000000	3.355	0.0187								Tukey p ≤ 0.05
Salicoyl-tremuloidin (p.a.)	0.507353	0.369412	1312.45	2660.79	33			Model	7	44348873	6335553	3.678			Strategy	1	1	5621854	3.2637	0.0829			mean	3392.63	2426.6			mean	3392.62	3518.42	1338.97
								Error	25	43063330	1722533	Prob > F			Construct(strategy)	1	1	29482773	17.1159	0.0003			s.e.	464.022	263.4			s.e.	464.022	378.873	366.026
								C. Total	32	87412204		0.0073			Line[Construct(strategy)]	5	5	11183929	1.2985	0.2962								Tukey p ≤ 0.05	A	A	B
Salicylic acid (p.a.)	0.562787	0.440368	59505.1	1139196	33			Model	7	113950000000	16280000000	4.5972			Strategy	1	1	42455000000	11.9901	0.0019			mean	1202017	1119094			mean	1.20202e+06	1.1553e+06	1.0812e+06
								Error	25	88521000000	3540900000	Prob > F			Construct(strategy)	1	1	34083000000	9.6255	0.0047			s.e.	21038.2	11942.3			s.e.	21038.2	17177.7	16595.2
								C. Total	32	202470000000		0.002			Line[Construct(strategy)]	5	5	42020000000	2.3735	0.0681								Tukey p ≤ 0.05	A	A	B
Tremulacin (p.a.)	0.49099	0.348467	4900159	36766709	33			Model	7	579040000000000	82720000000000	3.445			Strategy	1	1	3711000000000	0.1546	0.6976			mean	37237110	36616181			mean	37237110	39142855	33765039
								Error	25	600290000000000	24010000000000	Prob > F			Construct(strategy)	1	1	179510000000000	7.4759	0.0113			s.e.	1.73247e+06	983429			s.e.	1.73247e+06	1.41455e+06	1.36659e+06
								C. Total	32	1179300000000000		0.0102			Line[Construct(strategy)]	5	5	429380000000000	3.5764	0.0141								Tukey p ≤ 0.05	AB	A	B
Tremuloidin (p.a.)	0.459984	0.30878	2202378	2580007	33			Model	7	103290000000000	14760000000000	3.0421			Strategy	1	1	14213000000000	2.9303	0.0993			mean	1417806	2951911			mean	1.41781e+06	3.97797e+06	1.92302e+06
								Error	25	121260000000000	4850000000000	Prob > F			Construct(strategy)	1	1	26211000000000	5.4037	0.0285			s.e.	778658	442002			s.e.	778658	635772	614214
								C. Total	32	224550000000000		0.0186			Line[Construct(strategy)]	5	5	64732000000000	2.6691	0.0458								Tukey p ≤ 0.05	B	A	AB
